# Supplementary material for: N–N atropisomer synthesis via electrolyte- and base-free electrochemical cobalt-catalysed C–H annulation
Source: Royal Society of Chemistry journal article supplement (doi:10.1039/d4gc04390a), 2024-01-01
Supplement: d4gc04390a1.pdf [file d4gc04390a1.pdf]

## Supplementary Information

### **N–N Atropisomer Synthesis via Electrolyte- and Base-Free Electrochemical Cobalt-Catalysed C–H Annulation**

Jiating Cai,<sup>a,§</sup> Linzai Li,<sup>a,§</sup> Chuitian Wang,<sup>a</sup> Shi Qin,<sup>a</sup> Yuanyuan Li,<sup>a</sup> Si-Yan Liao,<sup>a</sup> Shengdong Wang,<sup>a</sup> Hui Gao,<sup>a</sup> Zhi Zhou,<sup>a</sup> Yugang Huang,<sup>a,\*</sup> Wei Yi<sup>a,\*</sup> and Zhongyi Zeng<sup>a,\*</sup>

<sup>a</sup>Guangzhou Municipal and Guangdong Provincial Key Laboratory of Molecular Target & Clinical Pharmacology, the NMPA and State Key Laboratory of Respiratory Disease, School of Pharmaceutical Sciences and the Fifth Affiliated Hospital, Guangzhou Medical University, Guangzhou, Guangdong 511436, China

<sup>§</sup>These authors contributed equally to this work.

\*E-mail: hyug@gzhmu.edu.cn; yiwei@gzhmu.edu.cn (W. Y.); zzeng@gzhmu.edu.cn (Z. Zeng)

## Table of Contents

|    |                                                                    |     |
|----|--------------------------------------------------------------------|-----|
| 1. | General Remarks.....                                               | S1  |
| 2. | Substrate List.....                                                | S2  |
| 3. | General Procedure.....                                             | S3  |
| 4. | Determining the Absolute Configuration of Enantiopure Product..... | S4  |
| 5. | Mechanistic Investigation.....                                     | S6  |
|    | Reversibility of C–H activation.....                               | S6  |
|    | Reversibility of C–H activation.....                               | S7  |
|    | Detection of dihydrogen gas.....                                   | S8  |
|    | Cyclic voltammetric studies.....                                   | S9  |
| 6. | Synthetic Application.....                                         | S12 |
|    | Electrophilic C–H chlorination.....                                | S12 |
|    | Electrophilic C–H bromination.....                                 | S13 |
|    | Electrophilic C–H iodination.....                                  | S14 |
|    | O-to-S exchange.....                                               | S15 |
| 7. | Synthesis and Characterization of Products.....                    | S16 |
| 8. | Copies of NMR spectra.....                                         | S38 |
| 9. | References.....                                                    | S81 |

## 1. General Remarks

Benzamides **1**<sup>1,2</sup> and Salox ligands<sup>3,4</sup> were prepared according to reported procedures. Co(OAc)<sub>2</sub>·4H<sub>2</sub>O, TFE and other chemicals were purchased from J&K (China) and used without further purification.

Platinum electrodes (10 mm × 20 mm × 0.3 mm, 99.99%) and graphite felt electrodes (10 mm × 20 mm × 2 mm) were obtained from Jianhuxian Lianhua Labware (China) and connected using stainless steel adapters. Electrolysis was conducted using an MYWAVE MPD-3003S potentiostat in constant current mode.

Nuclear magnetic resonance (NMR) spectra recorded on JEOL 400 MHz spectrometers at ambient temperature (25 °C) in either CDCl<sub>3</sub>. Abbreviations for data quoted are s, singlet; brs, broad singlet; d, doublet; t, triplet; q, quartet; dd, doublet of doublets; dt, doublet of triplets; td, triplet of doublets; m, multiplet. All NMR-data are reported in parts per million (ppm) relative to the solvent signal (CDCl<sub>3</sub>: δ<sub>H</sub> = 7.26 ppm, δ<sub>C</sub> = 77.16 ppm).

High-resolution mass spectrometry (HRMS) analyses were obtained on an agilent TOF-G6230B mass spectrometer and Thermo-DFS mass spectrometer with positive ion mode. Headspace analysis of the reaction mixture was performed on GC-7920A gas chromatograph (GC) system by Beijing Zhongjiao Jinyuan Technology Co., Ltd (China).

Thin-layer chromatographies were done on pre-coated silica gel 60 F254 plates (Merck). Silica gel 60H (200-300 mesh) and preparative TLC (200x200 mm, 0.2-0.25 mm in thickness) manufactured by Qingdao Haiyang Chemical Group Co. (China) were used for general chromatography. The enantiomeric excess (ee) of the products was determined by high-performance liquid chromatography (HPLC) with a chiral stationary phase in comparison with the authentic racemate sample. All the chiral stationary phases including Chiralcel IB, IB-3, IC-3, ID-3, IE-3, OD-RH and AS-RH used in this study were purchased from Daicel Chiral Technologies. Optical rotations were reported as follows: [α]<sub>D</sub><sup>20</sup> = (c: g/100 mL, in CH<sub>2</sub>Cl<sub>2</sub>).

Melting points were measured on a Mettler Hanon-MP450 and not corrected.

## 2. Substrate List

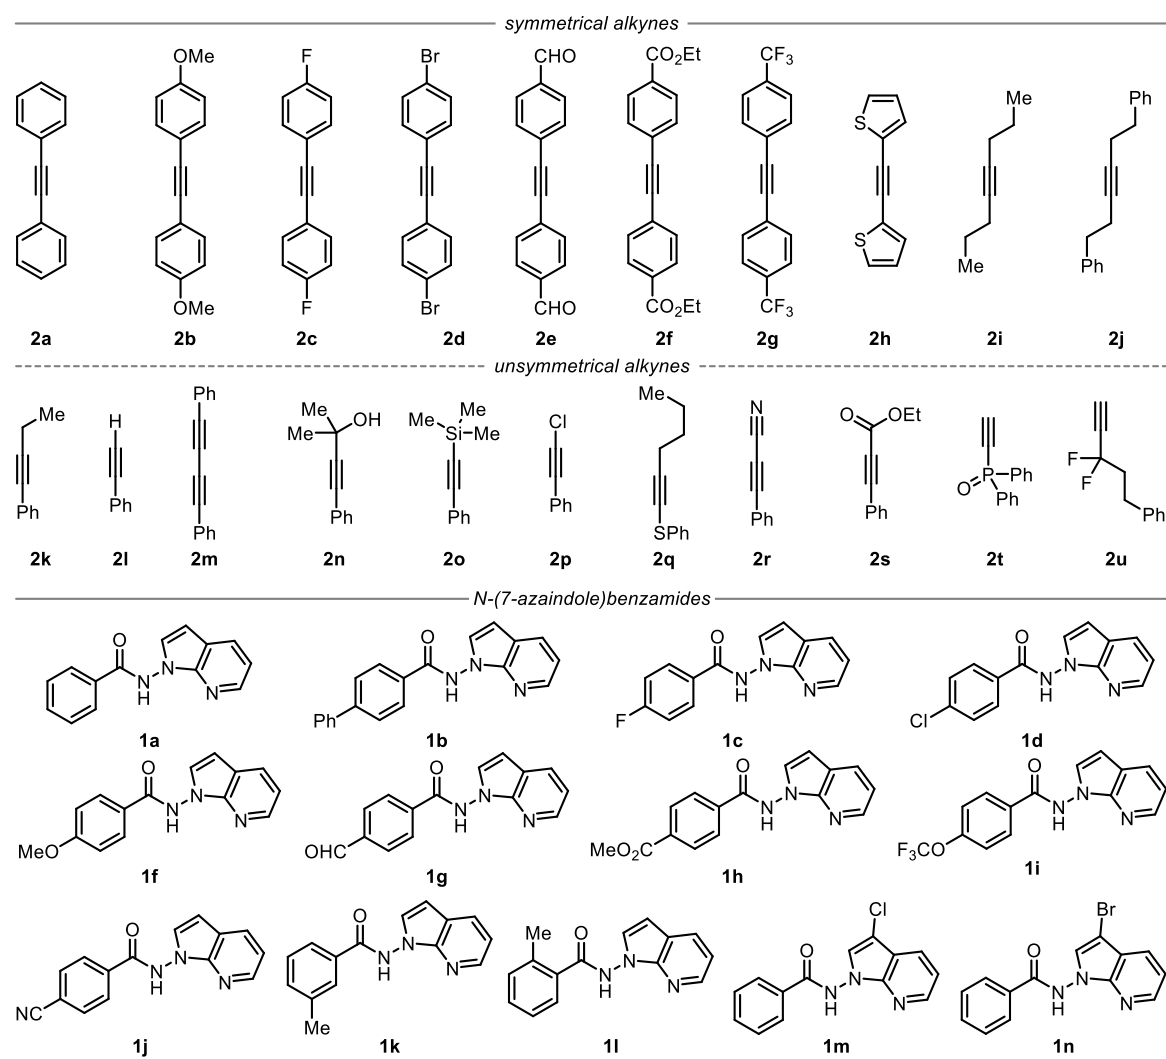

**Figure S1.** Tested alkyne and benzamides substrates.

### 3. General Procedure

#### General procedure (GP) for electrochemical cobalt-catalyzed atroposelective C–H annulation

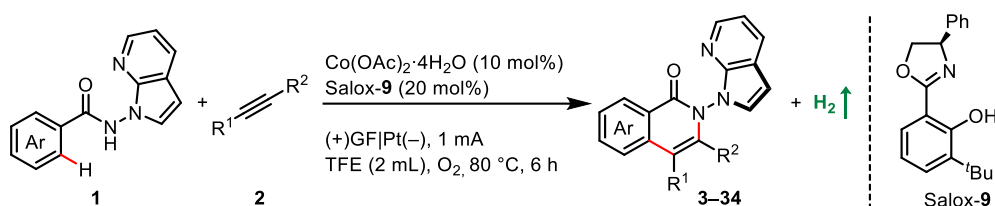

A dry 10 mL undivided cell with a Teflon™-coated stirring bar was charged with benzamides **1** (0.08 mmol, 1 equiv.), alkynes **2** (0.16 mmol, 2 equiv.),  $\text{Co}(\text{OAc})_2 \cdot 4\text{H}_2\text{O}$  (2.0 mg, 0.008 mmol, 10 mol%), Salox-**9** (4.7 mg, 0.016 mmol, 20 mol%), TFE (2 mL). The cell was sealed using a screw cap carrying a graphite felt anode (10 mm × 20 mm × 2 mm) and a platinum cathode (10 mm × 20 mm × 0.3 mm). The mixture was subjected to three cycles of vacuum/ $\text{O}_2$  and then electrolyzed at a constant current of 1.0 mA for 6 h (cumulated charge: 2.8 F·mol<sup>-1</sup>) at 80 °C with an aluminum block (Figure S4) under  $\text{O}_2$  atmosphere. Once completed, the mixture was filtered through a pad of silica gel and washed with EtOAc (1 mL × 3). The volatiles were removed with a rotary evaporator under reduced pressure and the residue was subjected to flash column chromatography or preparative thin layer chromatography over silica gel to give the corresponding products.

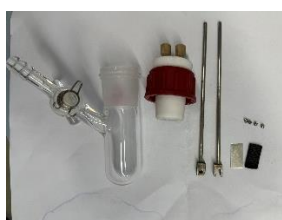

**Figure S2.** Detailed electrochemical parts.

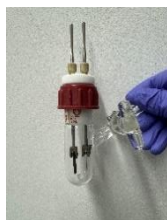

**Figure S3.** Undivided cell.

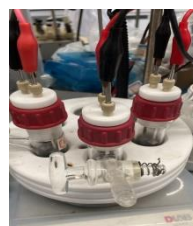

**Figure S4.** Running electrolytic reactions.

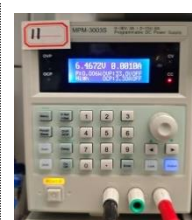

**Figure S5.** Power supply.

#### General procedure for the synthesis of racemic product.

A similar synthetic procedure was followed for synthesis of chiral products except that (*rac*)-Salox-**9** was used.

#### 4. Determining the Absolute Configuration of Enantiopure Product

##### Product comparison with literature

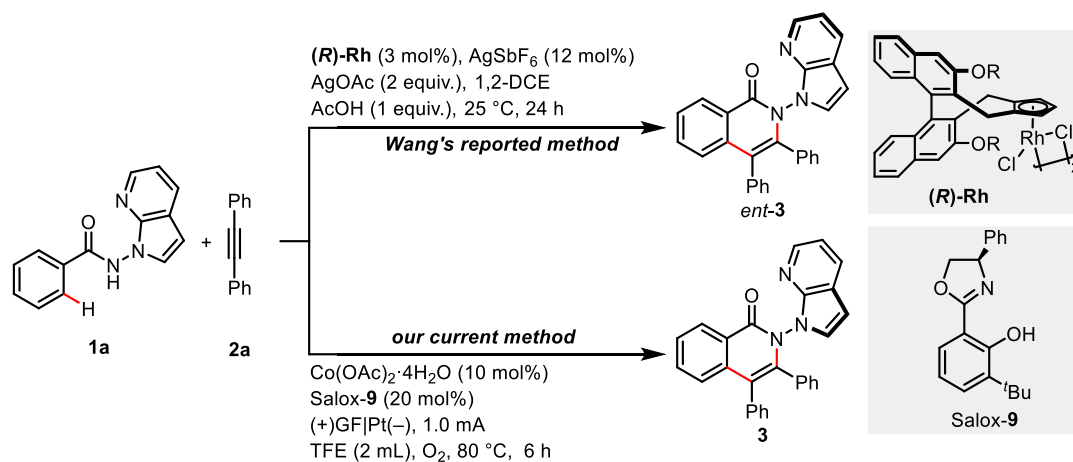

The procedure of Wang's report<sup>5</sup>: A dry 10 mL Schlenk tube with a Teflon™-coated stirring bar was charged with benzamide **1a** (24.0 mg, 0.1 mmol, 1 equiv.), alkyne **2a** (17.8 mg, 0.1 mmol, 1 equiv.), **(R)-Rh** (5.4 mg, 0.003 mmol, 3 mol%), AgSbF<sub>6</sub> (3.0 mg, 0.0012 mmol, 12 mol%), AgOAc (33.4 mg, 0.2 mmol, 2 equiv.), HOAc (6.0 mg, 0.1 mmol, 1.0 equiv.), and 1,2-DCE (1 mL). The reaction mixture was stirred at room temperature (25 °C) for 24 h. Then the mixture was filtered through a pad of silica gel and washed with EtOAc (1 mL x 3). The volatiles were removed with a rotary evaporator under reduced pressure and the residue was subjected to preparative thin layer chromatography over silica gel to give the corresponding product *ent-3*.

**HPLC conditions:** Daicel Chiralpak ID-3 column (85:15 *n*-hexane:2-propanol, 1.0 mL/min, 27 °C, 254 nm); *t<sub>r</sub>* (minor) = 36.7 min, *t<sub>r</sub>* (major) = 44.2 min, 95% ee.

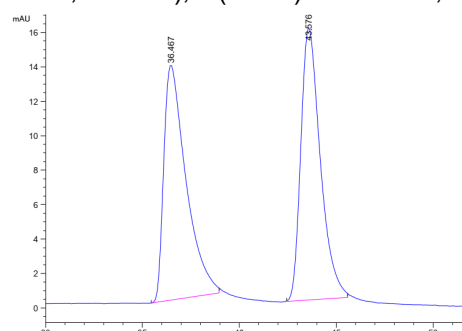

| No. | Time | Area   | Area (%) |
|-----|------|--------|----------|
| 1   | 36.5 | 1088.2 | 49.6     |
| 2   | 43.6 | 1105.5 | 50.4     |

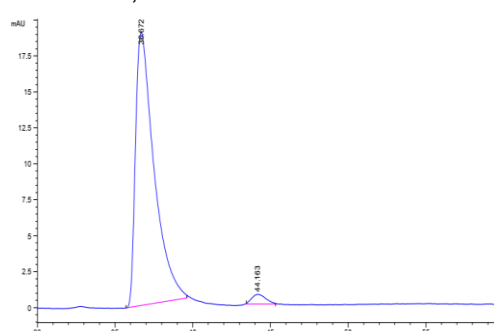

| No. | Time | Area   | Area (%) |
|-----|------|--------|----------|
| 1   | 36.7 | 1681.2 | 97.4     |
| 2   | 44.2 | 42.7   | 2.6      |

**Our newly developed procedure:** A dry 10 mL undivided cell with a Teflon™-coated stirring bar was charged with benzamide **1a** (19.2 mg, 0.08 mmol, 1 equiv.), alkyne **2a** (28.5 mg, 0.16 mmol, 2 equiv.), Co(OAc)<sub>2</sub>·4H<sub>2</sub>O (2.0 mg, 0.008 mmol, 10 mol%), Salox-9 (4.7 mg, 0.016 mmol, 20 mol%), TFE (2 mL). The cell was sealed using a screw cap carrying a graphite felt anode (10 mm × 20 mm × 2 mm) and a platinum cathode (10 mm × 20 mm × 0.3 mm). The mixture was subjected to three cycles of vacuum/O<sub>2</sub> and then electrolyzed at a constant current of 1.0 mA for 6 h (cumulated charge: 2.8 F·mol<sup>-1</sup>) at 80 °C with an aluminum block under O<sub>2</sub> atmosphere. Once completed, the mixture was filtered through a pad of silica gel and washed with EtOAc (1 mL × 3). The volatiles were removed with a rotary evaporator under reduced pressure and the residue was subjected to preparative thin layer chromatography over silica gel to give the corresponding product **3**.

**HPLC conditions:** Daicel Chiralpak ID-3 column (85:15 *n*-hexane:2-propanol, 1.0 mL/min, 27 °C, 254 nm); t<sub>r</sub> (minor) = 36.7 min, t<sub>r</sub> (major) = 42.5 min, 96% ee.

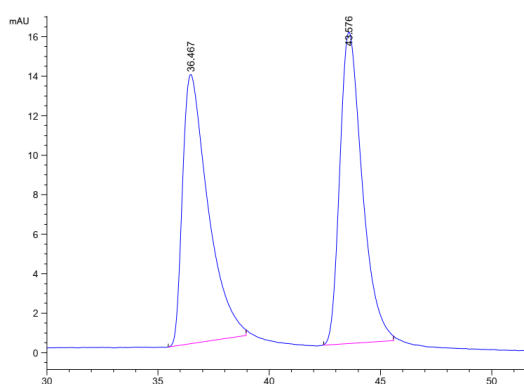

| No. | Time | Area   | Area (%) |
|-----|------|--------|----------|
| 1   | 36.5 | 1088.2 | 49.6     |
| 2   | 43.6 | 1105.5 | 50.4     |

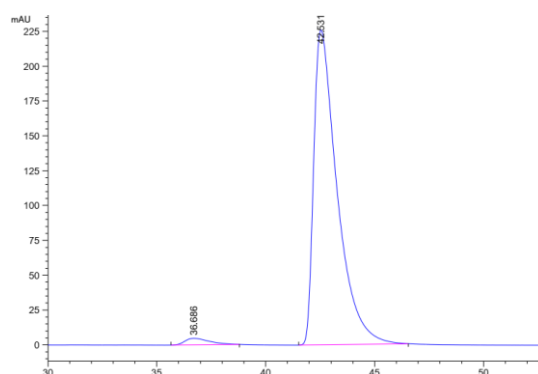

| No. | Time | Area    | Area (%) |
|-----|------|---------|----------|
| 1   | 36.7 | 377.4   | 2.2      |
| 2   | 42.5 | 16882.9 | 97.8     |

**Analysis and conclusion:** The product obtained by our newly developed method shows an opposite chiral HPLC traces with that of the one following the Wang's procedure, which was reported as (*S*)-chirality. Accordingly, the absolute configuration of our product **3** should be (*R*). In addition, this result can be supported by comparing the optical rotations from our new protocol ( $[\alpha]_D^{25} = +110.7$ , CH<sub>2</sub>Cl<sub>2</sub>) with Wang's initial report ( $[\alpha]_D^{20} = -12$  in CHCl<sub>3</sub>). Overall, our product **3** was assigned to be (*R*)-chirality, which extrapolated to the other products.

## 5. Mechanistic Investigation

### Reversibility of C–H activation

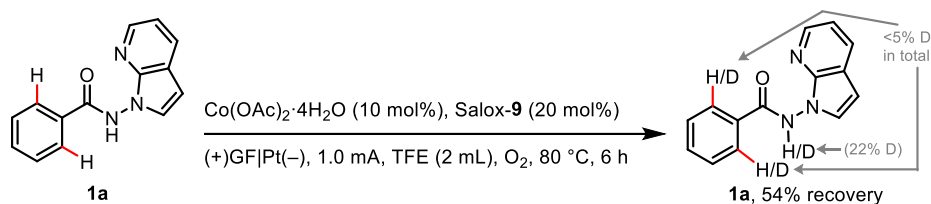

A dry 10 mL undivided cell with a Teflon™-coated stirring bar was charged with benzamide **1a** (19.2 mg, 0.08 mmol, 1 equiv.),  $\text{Co}(\text{OAc})_2 \cdot 4\text{H}_2\text{O}$  (2.0 mg, 0.008 mmol, 10 mol%), Salox-9 (4.7 mg, 0.016 mmol, 20 mol%), TFE (2 mL). The cell was sealed using a screw cap carrying a graphite felt anode (10 mm × 20 mm × 2 mm) and a platinum cathode (10 mm × 20 mm × 0.3 mm). The mixture was subjected to three cycles of vacuum/ $\text{O}_2$  and then electrolyzed at a constant current of 1.0 mA for 6 h (cumulated charge: 2.8 F·mol<sup>-1</sup>) at 80 °C with an aluminum block under  $\text{O}_2$  atmosphere. Once completed, the mixture was filtered through a pad of silica gel through a pad of silica gel and washed with EtOAc (1 mL × 3). The volatiles were removed with a rotary evaporator under reduced pressure and the residue was subjected to preparative thin layer chromatography over silica gel to give the substrate **1a** in 54% recovery. <sup>1</sup>H NMR analysis indicated that there is no obvious deuterium (<5% D) at the *ortho*-positions, which implies that C–H bond cleavage in this case is irreversible (Figure S6).

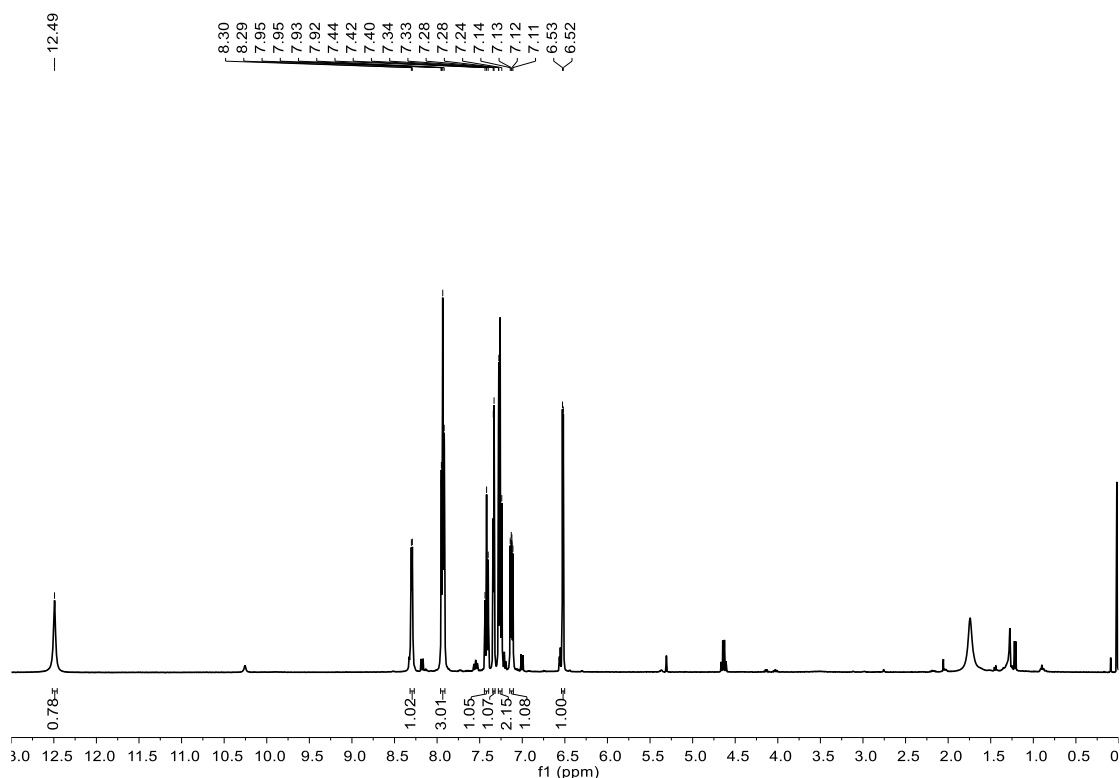

Figure S6. <sup>1</sup>H NMR spectrum of recovered **1a** (400 MHz,  $\text{CDCl}_3$ ).



## Reversibility of C–H activation

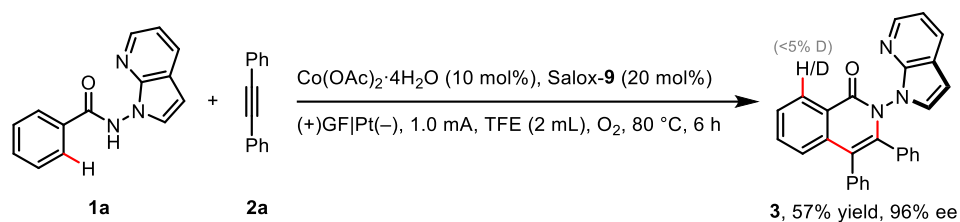

A dry 10 mL undivided cell with a Teflon™-coated stirring bar was charged with benzamide **1a** (19.2 mg, 0.08 mmol, 1 equiv.), alkyne **2a** (28.5 mg, 0.16 mmol, 2 equiv.),  $\text{Co}(\text{OAc})_2 \cdot 4\text{H}_2\text{O}$  (2.0 mg, 0.008 mmol, 10 mol%), Salox-9 (4.7 mg, 0.016 mmol, 20 mol%), TFE (2 mL). The cell was sealed using a screw cap carrying a graphite felt anode (10 mm × 20 mm × 2 mm) and a platinum cathode (10 mm × 20 mm × 0.3 mm). The mixture was subjected to three cycles of vacuum/ $\text{O}_2$  and then electrolyzed at a constant current of 1.0 mA for 6 h (cumulated charge: 2.8 F·mol<sup>-1</sup>) at 80 °C with an aluminum block under  $\text{O}_2$  atmosphere. Once completed, the mixture was filtered through a pad of silica gel and washed with EtOAc (1 mL × 3). The volatiles were removed with a rotary evaporator under reduced pressure and the residue was subjected to preparative thin layer chromatography over silica gel to give the corresponding product **3**. <sup>1</sup>H NMR analysis indicated that there is no obvious deuterium (<5% D) at the unreacted *ortho*-position (Figure S7).

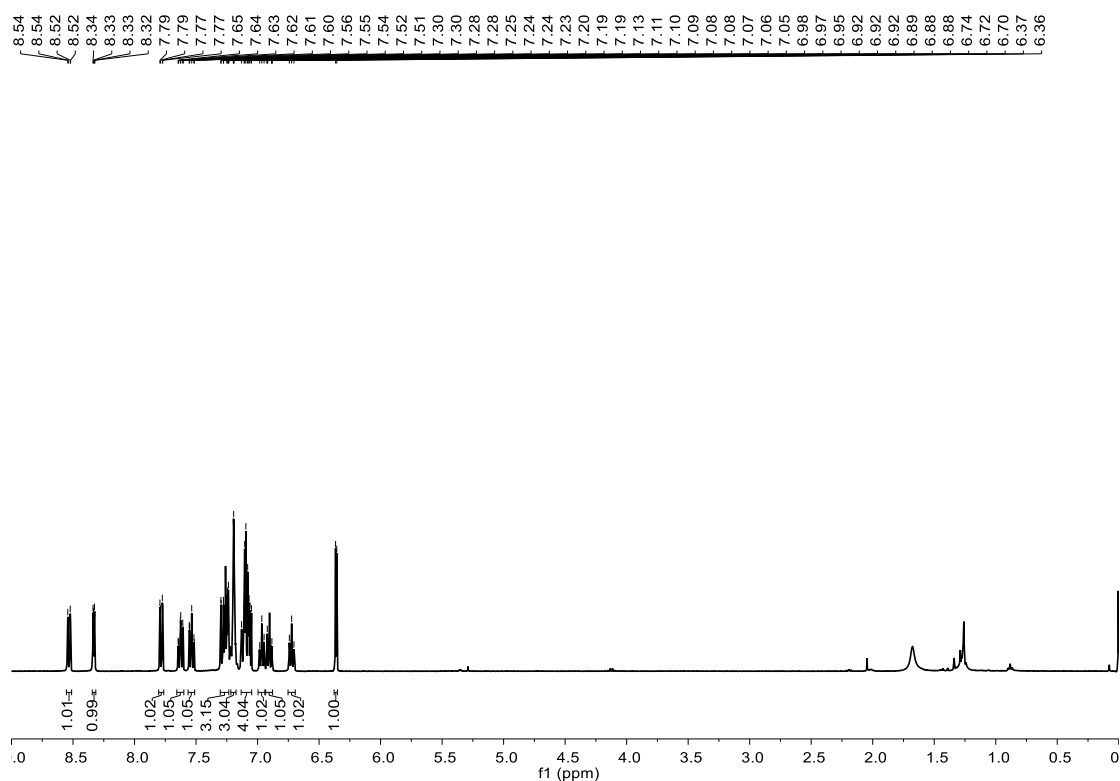

Figure S7. <sup>1</sup>H NMR spectrum of **3** (400 MHz,  $\text{CDCl}_3$ ).

## Detection of dihydrogen gas

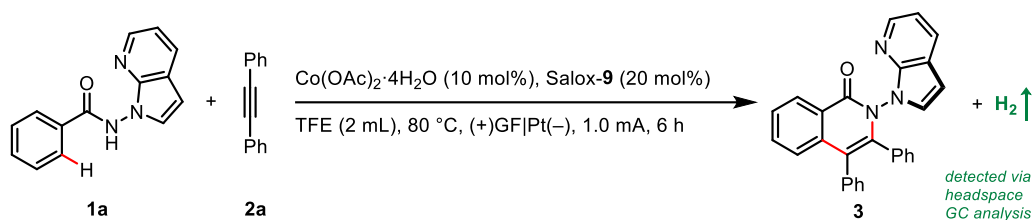

A dry 10 mL undivided cell with a Teflon™-coated stirring bar was charged with benzamide **1a** (19.2 mg, 0.08 mmol, 1 equiv.), alkyne **2a** (28.5 mg, 0.16 mmol, 2 equiv.),  $\text{Co}(\text{OAc})_2 \cdot 4\text{H}_2\text{O}$  (2.0 mg, 0.008 mmol, 10 mol%), Salox-**9** (4.7 mg, 0.016 mmol, 20 mol%), TFE (2 mL). The cell was sealed using a screw cap carrying a graphite felt anode (10 mm × 20 mm × 2 mm) and a platinum cathode (10 mm × 20 mm × 0.3 mm). The mixture was subjected to three cycles of vacuum/ $\text{O}_2$  and then electrolyzed at a constant current of 1.0 mA for 6 h (cumulated charge: 2.8 F·mol<sup>-1</sup>) at 80 °C with an aluminum block under  $\text{O}_2$  atmosphere (balloon). Once completed, 1 mL gas volume was taken from the headspace of the reaction flask with a gas syringe and analyzed by headspace-GC (Figure S8).

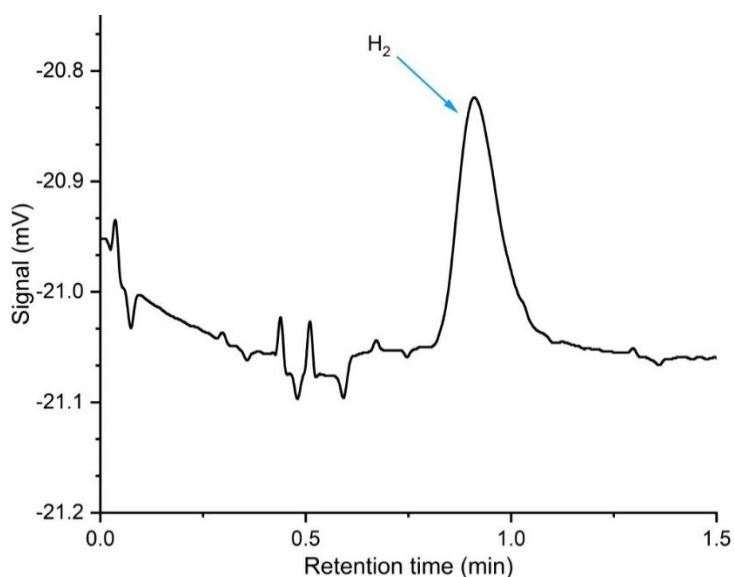

**Figure S8.** Chromatogram of the GC-headspace analysis.

## Cyclic voltammetric studies

The cyclic voltammetry (CV) was carried out with a CHI600E-potentiostat and Electrochemical Software 22.1.0.0 by CH Instruments, Inc. A glassy-carbon electrode (3 mm diameter) was used as the working electrode, a Pt-wire as counter electrode and a silver chloride electrode was used as the reference. The measurements were carried out at a scan rate of 100 mV/s. Anhydrous 2,2,2-trifluoroethanol (TFE) was degassed by bubbling nitrogen into the liquid for at least 5 minutes. The samples were dissolved in TFE, including supporting electrolyte  $n\text{Bu}_4\text{NBF}_4$  (100 mM), benzamide **1a** (10 mM), alkyne **2a** (10 mM),  $\text{Co}(\text{OAc})_2 \cdot 4\text{H}_2\text{O}$  (10 mM), Salox-**3** (10 mM), Salox-**8** (10 mM), Salox-**9** (10 mM). For each sample, three to five potential sweeps between 0 and +2.0 V vs. Ag/AgCl were performed. No significant changes between the first and last ones were observed over these cyclic voltammetry cycles, which demonstrates that the electrode surface is stable at these potentials.

**CV Analysis:** In the CV experiment (Figure S9 and Figure S10), benzamide **1a** showed an oxidation peak at +1.14 V (vs Ag/AgCl, same below, curve b), being supportive of its tendency to anodic oxidation. Instead, alkyne **2a** has a much higher oxidation peak (+1.86 V). Although Salox-**9** exhibited two pairs of reversible redox peaks and  $\text{Co}(\text{OAc})_2 \cdot 4\text{H}_2\text{O}$  seemed redox inert (curve c/d), their combination led to a shift forward of the oxidation wave with a potential of 0.60 V (curve e) and the reversibility of **1a** is significantly less pronounced. This implies that the *in-situ* coordination of  $\text{Co}^{\text{II}}$  salt with Salox-**9** could not only prevent the ligand decomposition, but also facilitate the oxidation of  $\text{Co}^{\text{II}}$  to  $\text{Co}^{\text{III}}$ . Such facilitation effect can be further observed in the presence of **1a** (curve f), which showed a lower oxidation potential of +0.52 V.

Moreover, we measured the cyclic voltammograms of three representative Salox ligands, including Salox-**3**, Salox-**8**, and Salox-**9**. As illustrated in Figure S11, the first oxidation peak of Salox-**9** ( $E_{\text{pa}1} = +0.86$  V, curve c) move slightly backward compared to those of Salox-**3** ( $E_{\text{pa}1} = +0.83$  V, curve a) and Salox-**8** ( $E_{\text{pa}1} = +0.77$  V, curve b). More importantly, although these three Salox ligands all exhibited two pairs of redox peaks, redox peaks of Salox-**9** appears much more reversible than those of Salox-**3** and Salox-**8**, which indicates the latter two ligands are more likely to degrade under electrolysis.

Finally, we conducted cyclic voltammograms of the combination of  $\text{Co}(\text{OAc})_2 \cdot 4\text{H}_2\text{O}$  with these three Salox ligands (Figure S12). The  $\text{Co}^{\text{II}}$ /Salox-**9** system shows an obvious oxidation peak at +0.59 V (curve c), which is significantly lower than those of both  $\text{Co}^{\text{II}}$ /Salox-**3** ( $E_{\text{pa}} = +1.05$  V, curve a) and  $\text{Co}^{\text{II}}$ /Salox-**8** ( $E_{\text{pa}} = +0.91$  V, curve b) combinations. Taking together, compared to Salox-**3** and Salox-**8**, Salox-**9** is less likely to electrochemically decompose and facilitate the oxidation of  $\text{Co}^{\text{II}}$  to  $\text{Co}^{\text{III}}$ .

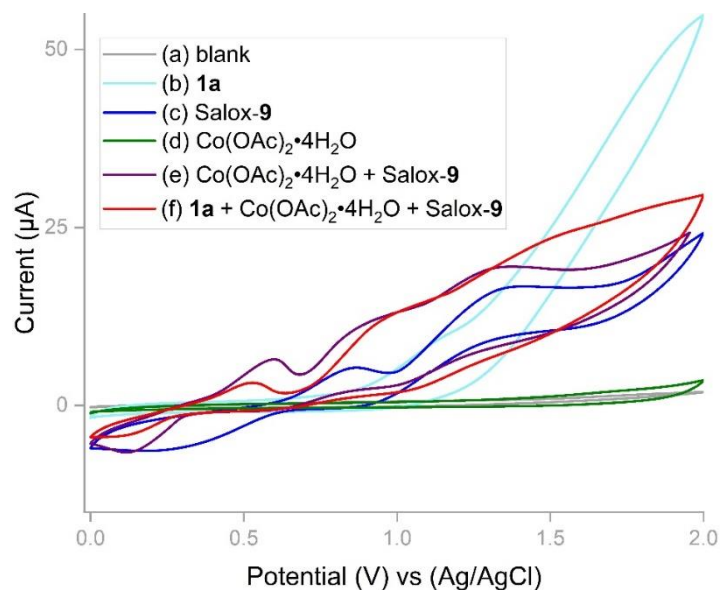

**Figure S9.** Cyclic voltammograms recorded on at the scan rate of 100 mV/s. (a) 3.0 mL  $t\text{Bu}_4\text{NBF}_4$  (100 mM) solution; (b) **1a** (10 mM) dissolved in 3.0 mL of  $t\text{Bu}_4\text{NBF}_4$  solution; (c) Salox-**9** (10 mM) dissolved in 3.0 mL of  $t\text{Bu}_4\text{NBF}_4$  solution; (d)  $\text{Co}(\text{OAc})_2 \cdot 4\text{H}_2\text{O}$  (10 mM) dissolved in 3.0 mL of  $t\text{Bu}_4\text{NBF}_4$  solution; (e)  $\text{Co}(\text{OAc})_2 \cdot 4\text{H}_2\text{O}$  (10 mM) and Salox-**9** (10 mM) dissolved in 3.0 mL of  $t\text{Bu}_4\text{NBF}_4$  solution; (f) **1a** (10 mM),  $\text{Co}(\text{OAc})_2 \cdot 4\text{H}_2\text{O}$  (10 mM) and Salox-**9** (10 mM) dissolved in 3.0 mL of  $t\text{Bu}_4\text{NBF}_4$  solution.

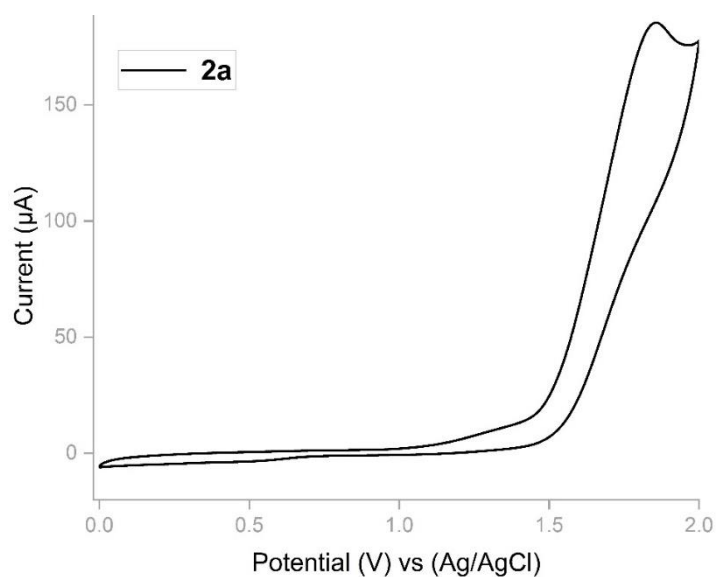

**Figure S10.** Cyclic voltammograms recorded on at the scan rate of 100 mV/s. **2a** (10 mM) dissolved in 3.0 mL of  $t\text{Bu}_4\text{NBF}_4$  solution.

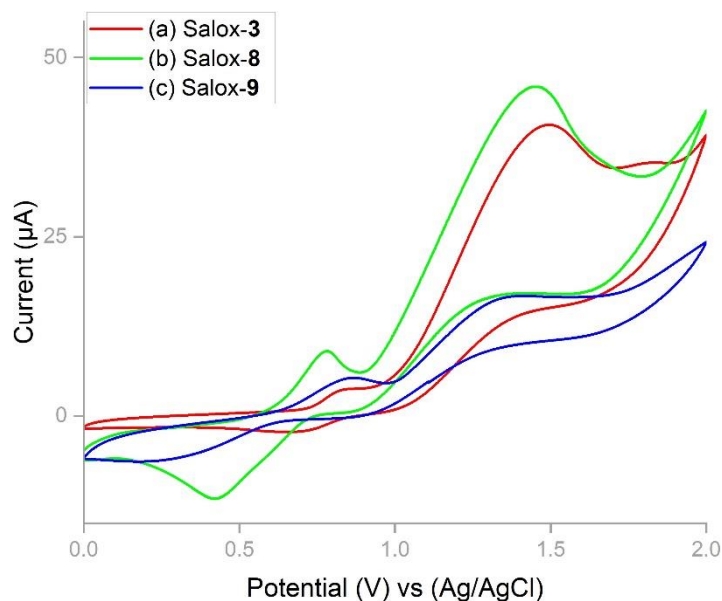

**Figure S11.** Cyclic voltammograms recorded on at the scan rate of 100 mV/s. (a) Salox-3 (10 mM) dissolved in 3.0 mL of  $t\text{Bu}_4\text{NBF}_4$  solution; (b) Salox-8 (10 mM) dissolved in 3.0 mL of  $t\text{Bu}_4\text{NBF}_4$  solution; (c) Salox-9 (10 mM) dissolved in 3.0 mL of  $t\text{Bu}_4\text{NBF}_4$  solution.

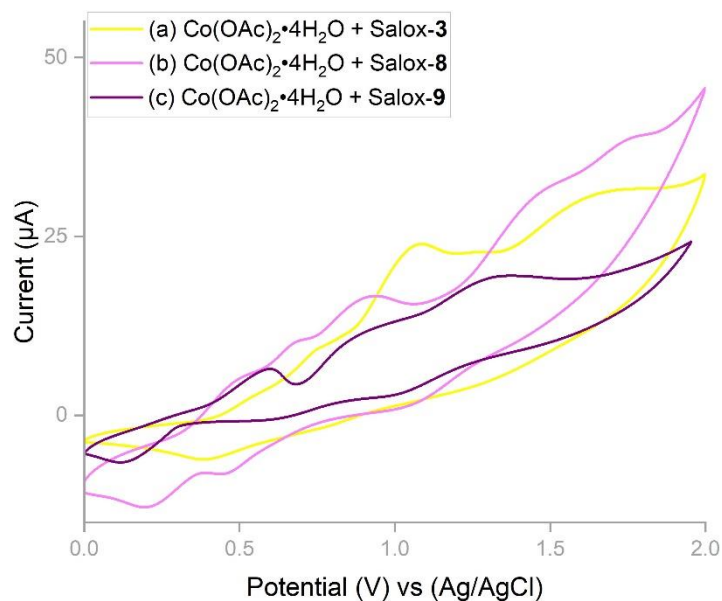

**Figure S12.** Cyclic voltammograms recorded on at the scan rate of 100 mV/s. (a)  $\text{Co}(\text{OAc})_2 \cdot 4\text{H}_2\text{O}$  (10 mM) and Salox-3 (10 mM) dissolved in 3.0 mL of  $t\text{Bu}_4\text{NBF}_4$  solution; (b)  $\text{Co}(\text{OAc})_2 \cdot 4\text{H}_2\text{O}$  (10 mM) and Salox-8 (10 mM) dissolved in 3.0 mL of  $t\text{Bu}_4\text{NBF}_4$  solution; (c)  $\text{Co}(\text{OAc})_2 \cdot 4\text{H}_2\text{O}$  (10 mM) and Salox-9 (10 mM) dissolved in 3.0 mL of  $t\text{Bu}_4\text{NBF}_4$  solution.

## 6. Synthetic Application

### Electrophilic C–H chlorination

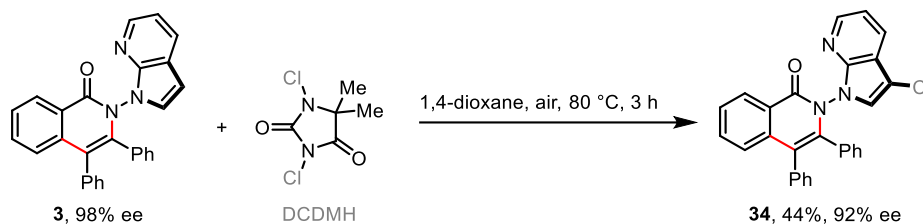

A dry 10 mL glass vessel with a Teflon<sup>TM</sup>-coated stirring bar was charged with isoquinolinone **3** (41.3 mg, 0.1 mmol, 1 equiv.), 1,3-dichloro-5,5-dimethylhydantoin (DCDMH, 10.8 mg, 0.055 mmol, 0.55 equiv.) and 1,4-dioxane (1 mL) under air atmosphere. The reaction mixture was allowed to stir at 80 °C for 3 h. Upon completion, the reaction mixture was extracted with EtOAc (5 mL x 3). The combined organic phase was dried over Na<sub>2</sub>SO<sub>4</sub> and filtered. The volatiles were removed with a rotary evaporator under reduced pressure and the residue was subjected to preparative thin layer chromatography over silica gel to give the chlorinated product **34** as white solid (19.7 mg, 0.044 mmol, 44%) with 92% ee. R<sub>f</sub> = 0.7 (PE/EtOAc = 3/1). m.p.: 162–164 °C.

**HPLC conditions:** Daicel Chiralpak AS-RH column (85:15 *n*-hexane: 2-propanol, 1.0 mL/min, 25 °C, 254 nm); t<sub>r</sub> (minor) = 4.4 min, t<sub>r</sub> (major) = 26.6 min, 92% ee.

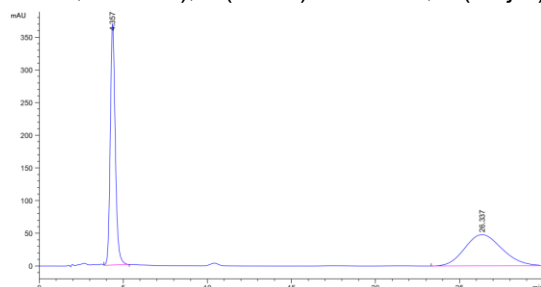

| No. | Time | Area   | Area (%) |
|-----|------|--------|----------|
| 1   | 4.4  | 7656.8 | 50.8510  |
| 2   | 26.3 | 7400.5 | 49.1490  |

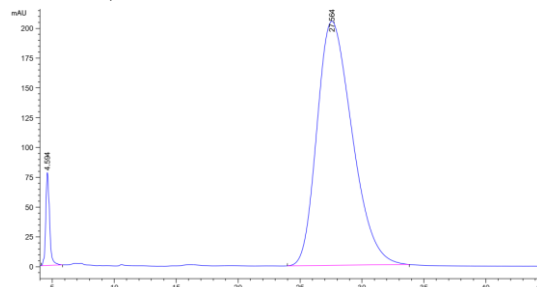

| No. | Time | Area    | Area (%) |
|-----|------|---------|----------|
| 1   | 4.6  | 1675.1  | 3.9787   |
| 2   | 27.6 | 40426.2 | 96.0213  |

## Electrophilic C–H bromination

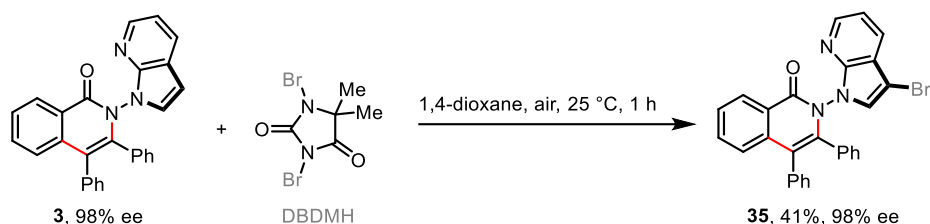

A dry 10 mL glass vessel with a Teflon™-coated stirring bar was charged with isoquinolinone **3** (41.3 mg, 0.1 mmol, 1 equiv.), 1,3-dibromo-5,5-dimethylhydantoin (DBDMH, 15.7 mg, 0.055 mmol, 0.55 equiv.) and 1,4-dioxane (1 mL) under air atmosphere. The reaction mixture was allowed to stir at room temperature (25 °C) for 1 h. Upon completion, the reaction mixture was extracted with EtOAc (5 mL x 3). The combined organic phase was dried over Na<sub>2</sub>SO<sub>4</sub> and filtered. The volatiles were removed with a rotary evaporator under reduced pressure and the residue was subjected to preparative thin layer chromatography over silica gel to give the brominated product **35** as white solid (20.2 mg, 0.041 mmol, 41%) with 96% ee. *R*<sub>f</sub> = 0.6 (PE/EtOAc =3/1). m.p.: 180–182 °C

**HPLC conditions:** Daicel Chiralpak IB-3 column (96:4 *n*-hexane: 2-propanol, 1.0 mL/min, 27 °C, 254 nm); *t*<sub>r</sub> (minor) = 25.7 min, *t*<sub>r</sub> (major) = 30.4 min, 96% ee.

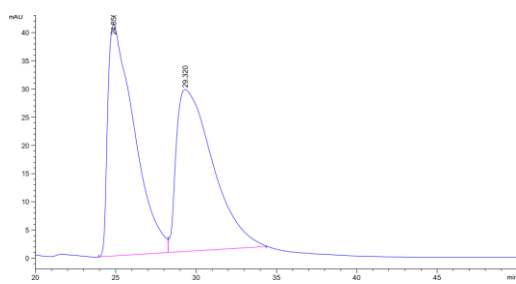

| No. | Time | Area   | Area (%) |
|-----|------|--------|----------|
| 1   | 24.9 | 4693.8 | 50.7784  |
| 2   | 29.3 | 4549.9 | 49.2216  |

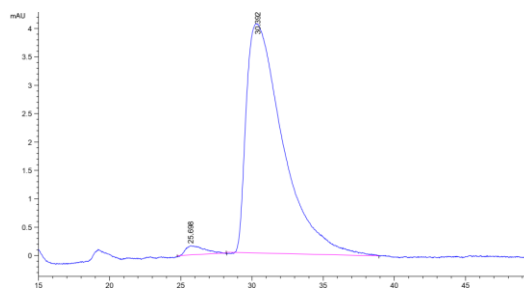

| No. | Time | Area  | Area (%) |
|-----|------|-------|----------|
| 1   | 25.7 | 14.8  | 2.0167   |
| 2   | 30.4 | 721.1 | 97.9833  |

## Electrophilic C–H iodination

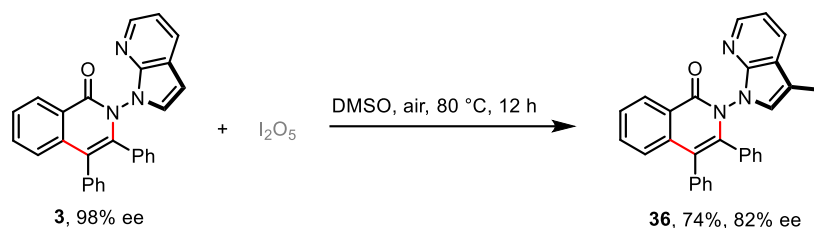

A dry 10 mL glass vessel with a Teflon™-coated stirring bar was charged with isoquinolinone **3** (41.3 mg, 0.1 mmol, 1 equiv.),  $I_2O_5$  (40.1 mg, 0.12 mmol, 1.2 equiv.) and DMSO (1 mL) under air atmosphere. The reaction mixture was allowed to stir at 80 °C for 12 h. Upon completion, the reaction mixture was extracted with EtOAc (5 mL x 3). The combined organic phase was dried over  $Na_2SO_4$  and filtered. The volatiles were removed with a rotary evaporator under reduced pressure and the residue was subjected to preparative thin layer chromatography over silica gel to give the brominated product **36** as pale yellow solid (39.9 mg, 0.074 mmol, 74%) with 82% ee.  $R_f = 0.5$  (PE/EtOAc = 3/1). m.p.: 218–220 °C.

### (*R*)-2-(3-iodo-1H-pyrrolo[2,3-b]pyridin-1-yl)-3,4-diphenylisoquinolin-1(2H)-one (**36**)

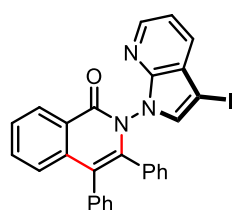

**$^1H$  NMR** (400 MHz,  $CDCl_3$ ):  $\delta$  8.52 (d,  $J = 3.8$  Hz, 1H), 8.33 (dd,  $J = 4.8$ , 1.4 Hz, 1H), 7.63 (td,  $J = 8.3$ , 7.8, 1.4 Hz, 1H), 7.59 (dd,  $J = 7.9$ , 1.4 Hz, 1H), 7.56 – 7.53 (m, 2H), 7.29 – 7.27 (m, 1H), 7.25 – 7.18 (m, 5H), 7.14 (dd,  $J = 7.9$ , 4.8 Hz, 1H), 7.08 (t,  $J = 8.5$  Hz, 2H), 7.00 (t,  $J = 7.9$  Hz, 1H), 6.94 – 6.91 (m, 1H), 6.72 (t,  $J = 7.6$  Hz, 1H) ppm.

**$^{13}C$  NMR** (100 MHz,  $CDCl_3$ ):  $\delta$  160.90, 146.67, 145.20, 141.72, 137.62, 135.46, 133.38, 132.76, 131.91, 131.50, 131.30, 129.93, 129.762, 129.756, 128.66, 128.36, 128.26, 128.01, 127.40, 127.27, 127.17, 127.04, 126.14, 125.23, 121.50, 119.56, 117.95 ppm.

**HRMS (ESI)**  $m/z$ :  $[M+H]^+$  Calcd for  $C_{28}H_{19}IN_3O$ : 540.0567; Found: 540.0569.

$[\alpha]_D^{25} = +105.7$  ( $c = 0.1$ ,  $CH_2Cl_2$ ).

**HPLC conditions:** Daicel Chiralpak IB-3 column (96:4 *n*-hexane: 2-propanol, 1.0 mL/min, 27 °C, 254 nm);  $t_r$  (minor) = 28.1 min,  $t_r$  (major) = 31.6 min, 82% ee.

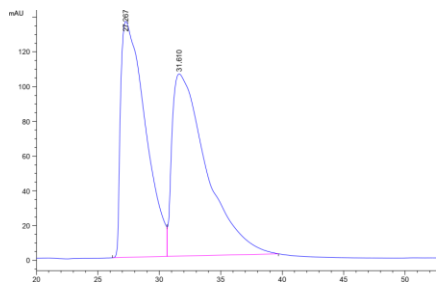

| No. | Time | Area    | Area (%) |
|-----|------|---------|----------|
| 1   | 27.3 | 18894.6 | 47.9349  |
| 2   | 31.6 | 20522.7 | 52.0651  |

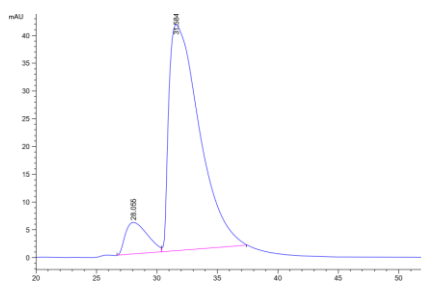

| No. | Time | Area   | Area (%) |
|-----|------|--------|----------|
| 1   | 28.1 | 717.6  | 9.1236   |
| 2   | 31.6 | 7147.9 | 90.8764  |



## O-to-S exchange

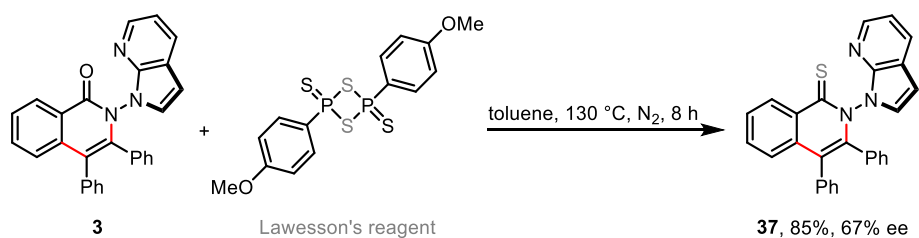

A dry 10 mL Schlenk tube with a Teflon™-coated stirring bar was charged with isoquinolinone **3** (41.3 mg, 0.1 mmol, 1 equiv.), Lawesson's reagent (161.8 mg, 0.4 mmol, 4.0 equiv.), and toluene (1 mL). The mixture was subjected to three cycles of vacuum/nitrogen and was allowed to stir at 130 °C for 8 h. Upon completion, the reaction mixture was extracted with EtOAc (5 mL x 3). The combined organic phase was dried over Na<sub>2</sub>SO<sub>4</sub> and filtered. The volatiles were removed with a rotary evaporator under reduced pressure and the residue was subjected to preparative thin layer chromatography over silica gel to give the product **37** as pale yellow solid (36.5 mg, 0.085 mmol, 85%) with 67% ee. R<sub>f</sub> = 0.7 (PE/EtOAc =3/1). m.p.: 108–110 °C.

### (*R*)-3,4-diphenyl-2-(1H-pyrrolo[2,3-b]pyridin-1-yl)isoquinoline-1(2H)-thione (**37**)

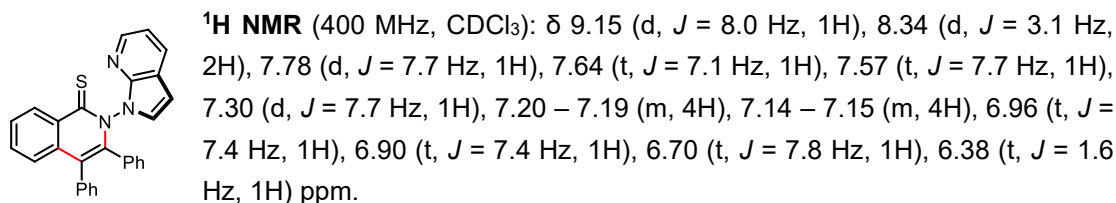

**<sup>13</sup>C NMR** (100 MHz, CDCl<sub>3</sub>): δ 186.70, 145.57, 144.39, 144.22, 135.34, 133.61, 133.59, 133.39, 133.23, 132.51, 131.30, 131.08, 129.80, 129.78, 129.56, 128.61, 128.37, 128.12, 128.10, 127.57, 127.02, 126.93, 126.54, 124.80, 118.44, 117.28, 100.58 ppm.

**HRMS (ESI)** *m/z*: [M+H]<sup>+</sup> Calcd for C<sub>28</sub>H<sub>20</sub>N<sub>3</sub>S: 430.1372; Found: 430.1375.

[α]<sub>D</sub><sup>25</sup> = +109.0 (*c* = 0.1, CH<sub>2</sub>Cl<sub>2</sub>).

**HPLC conditions:** Daicel Chiralpak AS-RH column (95:5 *n*-hexane: 2-propanol, 1.0 mL/min, 30°C, 254 nm); t<sub>r</sub> (minor) = 4.6 min, t<sub>r</sub> (major) = 9.3 min, 67% ee.

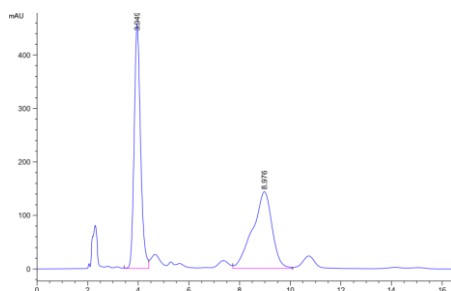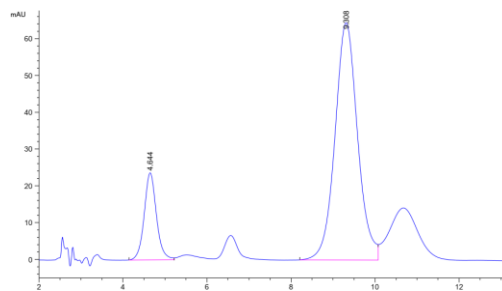

## 7. Synthesis and Characterization of Products

### (*R*)-3,4-diphenyl-2-(1*H*-pyrrolo[2,3-*b*]pyridin-1-yl)isoquinolin-1(2*H*)-one (**3**)

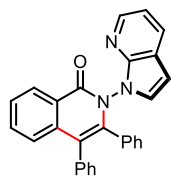

Following the general procedure, the title compound was obtained as white solid in 71% yield (23.2 mg, 0.06 mmol) with 96% ee.  $R_f = 0.6$  (PE/EtOAc = 3/1). m.p.: 153–155 °C.

**$^1\text{H NMR}$**  (400 MHz,  $\text{CDCl}_3$ ):  $\delta$  8.53 (dd,  $J = 8.0, 1.2$  Hz, 1H), 8.33 (dd,  $J = 4.8, 1.4$  Hz, 1H), 7.79 (dd,  $J = 7.8, 1.4$  Hz, 1H), 7.63 (td,  $J = 8.4, 7.8, 1.4$  Hz, 1H), 7.56 – 7.52 (m, 1H), 7.29 (d,  $J = 8.2$  Hz, 2H), 7.25 – 7.18 (m, 4H), 7.11 – 7.05 (m, 4H), 6.97 (t,  $J = 7.1$  Hz, 1H), 6.93 – 6.88 (m, 1H), 6.73 (t,  $J = 7.4$  Hz, 1H), 6.36 (d,  $J = 3.8$  Hz, 1H) ppm.

**$^{13}\text{C NMR}$**  (100 MHz,  $\text{CDCl}_3$ ):  $\delta$  161.20, 146.91, 144.21, 142.09, 137.75, 135.72, 133.34, 132.34, 131.68, 131.44, 129.96, 129.85, 129.54, 128.84, 128.75, 128.38, 128.25, 128.05, 127.38, 127.30, 127.09, 127.08, 126.15, 125.45, 119.46, 118.71, 117.25, 100.70 ppm.

**HRMS (ESI)**  $m/z$ :  $[\text{M}+\text{H}]^+$  Calcd for  $\text{C}_{28}\text{H}_{20}\text{N}_3\text{O}$ : 414.1606; Found: 414.1596.

$[\alpha]_D^{25} = +110.7$  ( $c = 0.1, \text{CH}_2\text{Cl}_2$ ).

**HPLC conditions:** Daicel Chiralpak ID-3 column (85:15 *n*-hexane: 2-propanol, 1.0 mL/min, 27 °C, 254 nm);  $t_r$  (minor) = 36.7 min,  $t_r$  (major) = 42.5 min, 96% ee.

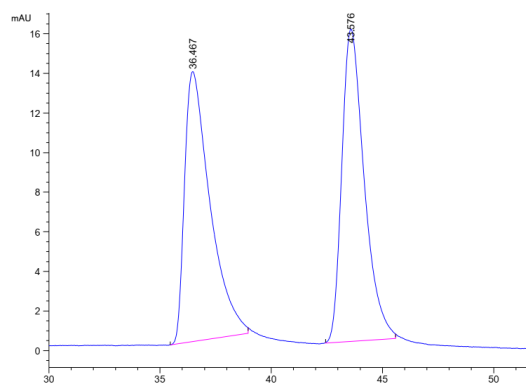

| No. | Time | Area   | Area (%) |
|-----|------|--------|----------|
| 1   | 36.5 | 1088.2 | 49.6     |
| 2   | 43.6 | 1105.5 | 50.4     |

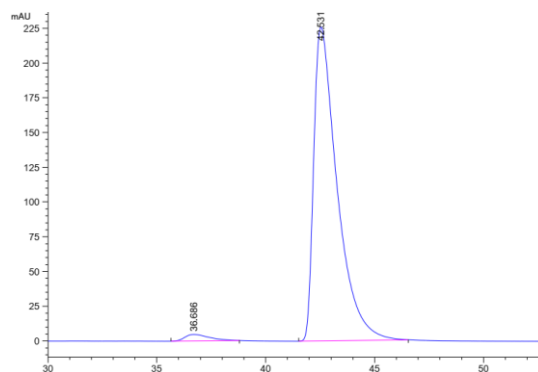

| No. | Time | Area    | Area (%) |
|-----|------|---------|----------|
| 1   | 36.7 | 377.4   | 2.2      |
| 2   | 42.5 | 16882.9 | 97.8     |

### (*R*)-3,4-bis(4-methoxyphenyl)-2-(1*H*-pyrrolo[2,3-*b*]pyridin-1-yl)isoquinolin-1(2*H*)-one (**4**)

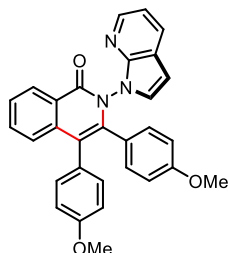

Following the general procedure, the title compound was obtained as white solid in 54% yield (20.4 mg, 0.04 mmol) with 96% ee.  $R_f = 0.7$  (PE/EtOAc = 1/1). m.p.: 109–113 °C.

**$^1\text{H NMR}$**  (400 MHz,  $\text{CDCl}_3$ ):  $\delta$  8.50 (ddd,  $J = 8.0, 1.5, 0.5$  Hz, 1H), 8.32 (dd,  $J = 4.8, 1.5$  Hz, 1H), 7.80 (dd,  $J = 7.8, 1.5$  Hz, 1H), 7.61 (ddd,  $J = 8.2, 7.2, 1.5$  Hz, 1H), 7.51 (ddd,  $J = 8.3, 7.2, 1.2$  Hz, 1H), 7.30 (ddd,  $J = 8.2, 1.2, 0.6$  Hz, 1H), 7.14 (dd,  $J = 8.4, 2.1$  Hz, 1H), 7.08–7.05 (m,  $J = 7.6, 3.1, 1.6$  Hz, 3H), 7.00 (ddd,  $J = 14.4, 8.5, 2.1$  Hz, 2H), 6.81 (dd,  $J = 8.4, 2.6$  Hz, 1H), 6.74 (dd,  $J = 8.5, 2.7$  Hz, 1H), 6.49 (dd,  $J = 8.4, 2.6$  Hz, 1H), 6.38 (d,  $J = 3.8$  Hz, 1H), 6.25 (dd,  $J = 8.5, 2.7$  Hz, 1H), 3.76 (s, 3H), 3.56 (s, 3H) ppm.

**$^{13}\text{C NMR}$**  (100 MHz,  $\text{CDCl}_3$ ):  $\delta$  161.29, 158.97, 158.48, 146.98, 144.19, 142.11, 138.15, 133.24, 132.72, 132.46, 131.25, 131.05, 129.54, 128.86, 128.69, 128.13, 127.20, 126.13, 125.37, 124.91, 119.30, 118.77, 117.19, 113.69, 113.63, 112.62, 112.49, 100.72, 55.24, 54.98

ppm.

**HRMS (ESI) m/z:** [M+H]<sup>+</sup> Calcd for C<sub>30</sub>H<sub>24</sub>N<sub>3</sub>O<sub>3</sub>: 474.1818; Found: 474.1814.

**[α]<sub>D</sub><sup>25</sup>** = +315.3 (c = 0.1, CH<sub>2</sub>Cl<sub>2</sub>).

**HPLC conditions:** Daicel Chiralpak ID-3 column (80:20 *n*-hexane: 2-propanol, 1.0 mL/min, 30°C, 254 nm); t<sub>r</sub> (minor) = 44.5 min, t<sub>r</sub> (major) = 47.3 min, 96% ee.

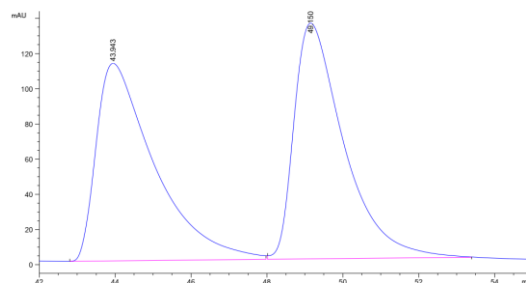

| No. | Time | Area    | Area (%) |
|-----|------|---------|----------|
| 1   | 43.9 | 11970.6 | 49.5     |
| 2   | 49.2 | 12235.8 | 50.5     |

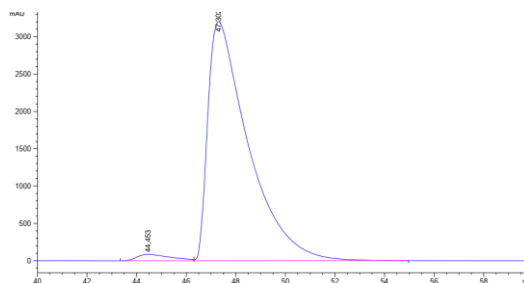

| No. | Time | Area   | Area (%) |
|-----|------|--------|----------|
| 1   | 44.5 | 7863.8 | 2.1      |
| 2   | 47.3 | 362643 | 97.9     |

(*R*)-3,4-bis(4-fluorophenyl)-2-(1H-pyrrolo[2,3-*b*]pyridin-1-yl)isoquinolin-1(2H)-one (**5**)

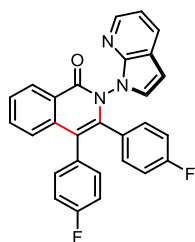

Following the general procedure, the title compound was obtained as white solid in 48% yield (19.4 mg, 0.04 mmol) with 97% ee. R<sub>f</sub> = 0.7 (PE/EtOAc = 1/1). m.p.: 97–99 °C.

**<sup>1</sup>H NMR** (400 MHz, CDCl<sub>3</sub>): δ 8.52 (d, *J* = 8.3 Hz, 1H), 8.31 (d, *J* = 4.7 Hz, 1H), 7.82 – 7.80 (m, 1H), 7.67 – 7.63 (m, 1H), 7.55 (t, *J* = 7.6 Hz, 1H), 7.24 (s, 1H), 7.19 – 7.15 (m, 2H), 7.13 – 7.04 (m, 4H), 7.00 – 6.90 (m, 2H), 6.68 (td, *J* = 8.5, 2.5 Hz, 1H), 6.44 (td, *J* = 8.6, 2.5 Hz, 1H), 6.41 – 6.40 (m, 1H) ppm.

**<sup>13</sup>C NMR** (100 MHz, CDCl<sub>3</sub>): δ 162.22 (d, *J*<sub>C-F</sub> = 248.9 Hz), 161.97 (d, *J*<sub>C-F</sub> = 247.3 Hz), 161.10, 146.82, 144.27, 141.45, 137.51, 133.52, 133.24 (d, *J*<sub>C-F</sub> = 8.2 Hz), 132.96 (d, *J*<sub>C-F</sub> = 8.3 Hz), 131.81 (d, *J*<sub>C-F</sub> = 8.1 Hz), 131.62 (d, *J*<sub>C-F</sub> = 8.5 Hz), 131.49 (d, *J* = 3.8 Hz), 129.70, 128.86, 128.65, 128.28 (d, *J*<sub>C-F</sub> = 3.8 Hz), 127.66, 125.94, 125.51, 118.79, 118.75, 117.43, 115.61 (d, *J*<sub>C-F</sub> = 21.3 Hz), 115.35 (d, *J* = 21.5 Hz), 114.58, 114.36, 101.01 ppm.

**<sup>19</sup>F NMR** (376 MHz, CDCl<sub>3</sub>): δ -111.68 – -111.73 (m, 1F), -114.00 – -114.05 (m, 1F) ppm.

**HRMS (ESI) m/z:** [M+H]<sup>+</sup> Calcd for C<sub>28</sub>H<sub>18</sub>F<sub>2</sub>N<sub>3</sub>O: 450.1418; Found: 450.1413.

**[α]<sub>D</sub><sup>25</sup>** = +110.3 (c = 0.1, CH<sub>2</sub>Cl<sub>2</sub>).

**HPLC conditions:** Daicel Chiralpak ID-3 column (92:8 *n*-hexane: 2-propanol, 1.0 mL/min, 27 °C, 254 nm); t<sub>r</sub> (minor) = 34.8 min, t<sub>r</sub> (major) = 38.5 min, 97% ee.

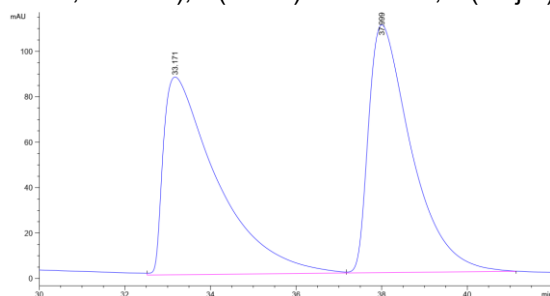

| No. | Time | Area   | Area (%) |
|-----|------|--------|----------|
| 1   | 33.2 | 7636.7 | 50.1620  |
| 2   | 38.0 | 7587.3 | 49.8380  |

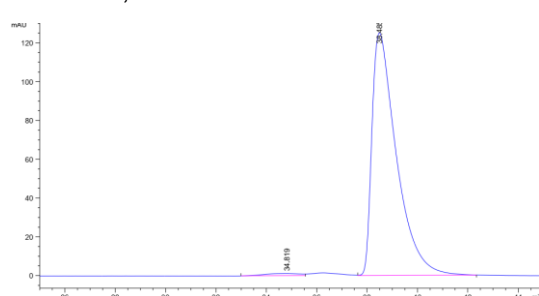

| No. | Time | Area   | Area (%) |
|-----|------|--------|----------|
| 1   | 34.8 | 119.9  | 1.4000   |
| 2   | 38.5 | 8444.1 | 98.6000  |

(*R*)-3,4-bis(4-bromophenyl)-2-(1H-pyrrolo[2,3-*b*]pyridin-1-yl)isoquinolin-1(2H)-one (**6**)

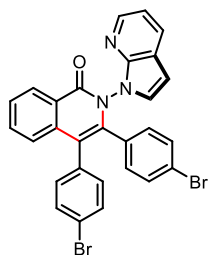

Following the general procedure, the title compound was obtained as white solid in 40% yield (18.2 mg, 0.03 mmol) with 99.5% ee.  $R_f = 0.7$  (PE/EtOAc = 1/1). m.p.: 121–123 °C.

**$^1\text{H NMR}$**  (400 MHz,  $\text{CDCl}_3$ ):  $\delta$  8.51 (d,  $J = 7.9$  Hz, 1H), 8.30 (d,  $J = 4.7$  Hz, 1H), 7.82 (dt,  $J = 7.9, 1.5$  Hz, 1H), 7.67 – 7.62 (m, 1H), 7.55 (t,  $J = 7.6$  Hz, 1H), 7.44 – 7.41 (m, 1H), 7.39 (dd,  $J = 8.1, 1.4$  Hz, 1H), 7.22 (d,  $J = 8.1$  Hz, 1H), 7.14 (d,  $J = 8.1$  Hz, 1H), 7.11 – 7.07 (m, 2H), 7.07 – 7.01 (m, 3H),

6.95 (d,  $J = 7.9$  Hz, 1H), 6.90 (d,  $J = 8.2$  Hz, 1H), 6.41 (dd,  $J = 3.8, 1.3$  Hz, 1H) ppm.

**$^{13}\text{C NMR}$**  (100 MHz,  $\text{CDCl}_3$ ):  $\delta$  160.99, 146.95, 144.30, 141.13, 137.19, 134.44, 133.57, 133.24, 132.99, 131.90, 131.59, 131.45, 131.30, 131.09, 130.64, 130.62, 129.77, 128.91, 128.65, 127.79, 125.89, 125.55, 122.96, 121.87, 118.83, 118.44, 117.52, 101.25 ppm.

**HRMS (ESI)**  $m/z$ :  $[\text{M}+\text{H}]^+$  Calcd for  $\text{C}_{28}\text{H}_{18}\text{Br}_2\text{N}_3\text{O}$ : 569.9811; Found: 571.9787.

$[\alpha]_D^{25} = +264.9$  ( $c = 0.1$ ,  $\text{CH}_2\text{Cl}_2$ ).

**HPLC conditions:** Daicel Chiralpak IB column (70:30 *n*-hexane: 2-propanol, 1.0 mL/min, 30°C, 254 nm);  $t_r$  (minor) = 17.4 min,  $t_r$  (major) = 22.5 min, 99.5% ee.

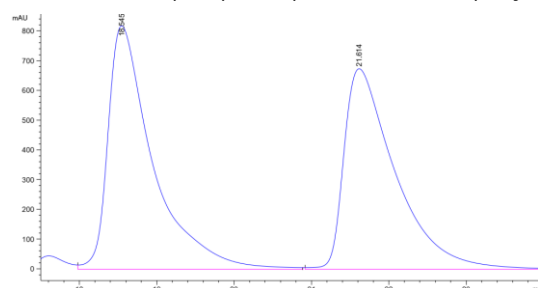

| No. | Time | Area    | Area (%) |
|-----|------|---------|----------|
| 1   | 18.5 | 33073.5 | 51.4519  |
| 2   | 21.6 | 31207.0 | 48.5481  |

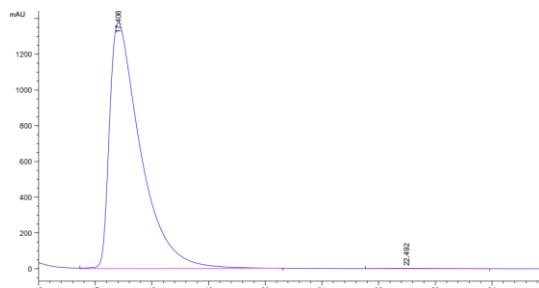

| No. | Time | Area    | Area (%) |
|-----|------|---------|----------|
| 1   | 17.4 | 52170.5 | 99.7697  |
| 2   | 22.5 | 120.4   | 0.2303   |

(*R*)-4,4'-(1-oxo-2-(1H-pyrrolo[2,3-b]pyridin-1-yl)-1,2-dihydroisoquinoline-3,4-diyl)dibenzaldehyde (**7**)

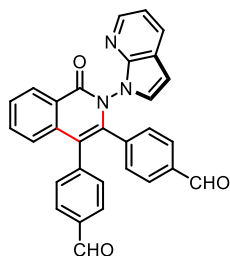

Following the general procedure, the title compound was obtained as black solid in 43% yield (16.2 mg, 0.03 mmol) with 98% ee.  $R_f = 0.4$  (PE/EtOAc = 1/1). m.p.: 108–110 °C.

**$^1\text{H NMR}$**  (400 MHz,  $\text{CDCl}_3$ ):  $\delta$  9.95 (s, 1H), 9.71 (s, 1H), 8.54 (dd,  $J = 8.1, 1.3$  Hz, 1H), 8.32 (dd,  $J = 4.8, 1.5$  Hz, 1H), 7.80 (d,  $J = 1.6$  Hz, 1H), 7.78 (d,  $J = 1.5$  Hz, 1H), 7.76 – 7.73 (m, 1H), 7.67 (ddd,  $J = 8.3, 7.3, 1.5$  Hz, 1H), 7.59 (td,  $J = 7.8, 7.3, 1.2$  Hz, 1H), 7.50 (dd,  $J = 7.8, 1.6$  Hz,

1H), 7.41 (d,  $J = 1.9$  Hz, 1H), 7.39 (d,  $J = 1.9$  Hz, 1H), 7.36 (dd,  $J = 7.9, 1.6$  Hz, 1H), 7.27 (dt,  $J = 5.6, 3.6$  Hz, 2H), 7.23 – 7.21 (m, 1H), 7.12 (d,  $J = 3.8$  Hz, 1H), 7.09 (dd,  $J = 7.8, 4.8$  Hz, 1H), 6.39 (d,  $J = 3.8$  Hz, 1H) ppm.

**$^{13}\text{C NMR}$**  (100 MHz,  $\text{CDCl}_3$ ):  $\delta$ . 191.74, 191.47, 160.86, 146.83, 144.40, 141.79, 140.99, 137.83, 136.65, 135.77, 135.45, 133.80, 132.39, 132.16, 130.75, 130.46, 130.08, 129.84, 129.49, 129.07, 128.71, 128.54, 128.43, 128.15, 125.77, 125.61, 118.74, 118.49, 117.67, 101.40 ppm.

**HRMS (ESI)**  $m/z$ :  $[\text{M}+\text{H}]^+$  Calcd for  $\text{C}_{30}\text{H}_{20}\text{N}_3\text{O}_3$ : 470.1505; Found: 470.1496.

$[\alpha]_D^{25} = +195.7$  ( $c = 0.1$ ,  $\text{CH}_2\text{Cl}_2$ ).

**HPLC conditions:** Daicel Chiralpak OD-RH column (70:30 *n*-hexane: 2-propanol, 1.0 mL/min, 30°C, 254 nm);  $t_r$  (minor) = 19.6 min,  $t_r$  (major) = 24.0 min, 98% ee.

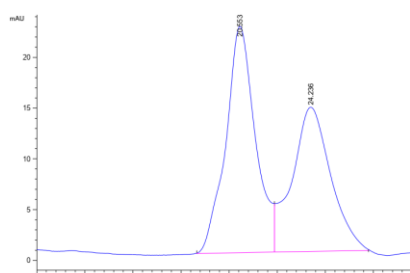

| No. | Time | Area   | Area (%) |
|-----|------|--------|----------|
| 1   | 20.6 | 2446.8 | 53.1648  |
| 2   | 24.2 | 2155.5 | 46.8352  |

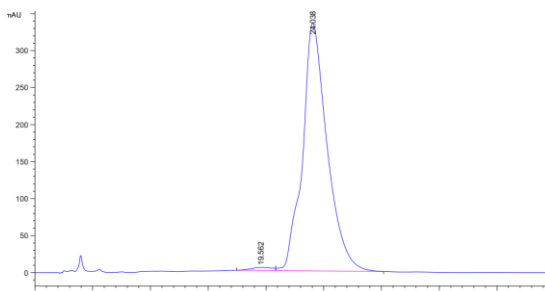

| No. | Time | Area    | Area (%) |
|-----|------|---------|----------|
| 1   | 19.6 | 558.5   | 1.1087   |
| 2   | 24.0 | 49815.4 | 98.8913  |

**(R)-diethyl 4,4'-(1-oxo-2-(1H-pyrrolo[2,3-b]pyridin-1-yl)-1,2-dihydroisoquinoline-3,4-diyl) dibenzoate (8)**

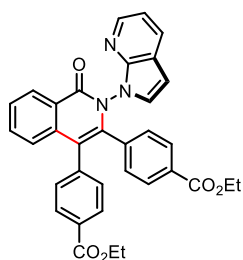

Following the general procedure, the title compound was obtained as white solid in 57% yield (25.4 mg, 0.05 mmol) with 97% ee.  $R_f = 0.4$  (PE/EtOAc = 2/1). m.p.: 136–138 °C.

<sup>1</sup>H NMR (400 MHz, CDCl<sub>3</sub>): δ 8.53 (d,  $J = 8.0$  Hz, 1H), 8.32 (d,  $J = 4.8$  Hz, 1H), 7.95 (dd,  $J = 8.0, 1.7$  Hz, 1H), 7.90 (dt,  $J = 8.0, 1.6$  Hz, 1H), 7.81 – 7.78 (m, 1H), 7.68 – 7.62 (m, 2H), 7.59 – 7.55 (m, 1H), 7.43 (d,  $J = 8.1$  Hz, 1H), 7.29 (ddd,  $J = 13.4, 9.2, 2.7$  Hz, 3H), 7.24 – 7.17 (m, 3H), 7.09 (ddd,  $J = 7.7, 5.4, 3.3$  Hz, 2H), 6.39 (dd,  $J = 3.8, 2.2$  Hz, 1H), 4.35 (qd,  $J = 7.1, 1.9$  Hz, 2H), 4.25 – 4.19 (m, 2H), 1.37 (td,  $J = 7.1, 1.9$  Hz, 3H), 1.28 (td,  $J = 7.1, 2.0$  Hz, 3H) ppm.

<sup>13</sup>C NMR (100 MHz, CDCl<sub>3</sub>): δ 166.31, 165.88, 160.96, 146.89, 144.36, 141.21, 140.17, 136.97, 136.46, 133.64, 131.69, 131.46, 130.30, 129.97, 129.87, 129.78, 129.67, 129.51, 128.94, 128.61, 128.56, 128.48, 127.89, 125.87, 125.53, 118.75, 118.69, 117.55, 101.25, 61.24, 14.42, 14.28 ppm.

**HRMS (ESI)** m/z: [M+H]<sup>+</sup> Calcd for C<sub>34</sub>H<sub>28</sub>N<sub>3</sub>O<sub>5</sub>: 558.2029; Found: 558.2021.

$[\alpha]_D^{25} = +184.0$  (c = 0.1, CH<sub>2</sub>Cl<sub>2</sub>).

**HPLC conditions:** Daicel Chiralpak ID-3 column (80:20 *n*-hexane: 2-propanol, 1.0 mL/min, 27 °C, 254 nm);  $t_r$  (minor) = 43.8 min,  $t_r$  (major) = 46.2 min, 97% ee.

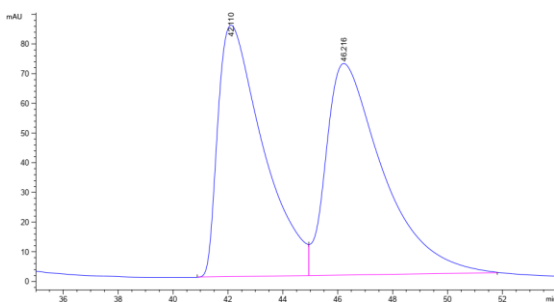

| No. | Time | Area    | Area (%) |
|-----|------|---------|----------|
| 1   | 42.1 | 9690.6  | 48.5931  |
| 2   | 46.2 | 10251.7 | 51.4069  |

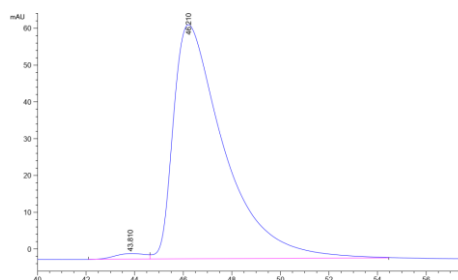

| No. | Time | Area   | Area (%) |
|-----|------|--------|----------|
| 1   | 43.8 | 133.3  | 1.4210   |
| 2   | 46.2 | 9244.1 | 98.5790  |

**(R)-2-(1H-pyrrolo[2,3-b]pyridin-1-yl)-3,4-bis(4-(trifluoromethyl)phenyl)isoquinolin-1(2H)-one (9)**

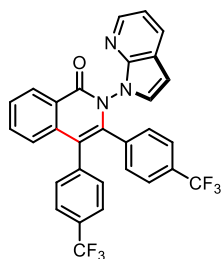

Following the general procedure, the title compound was obtained as white solid in 64% yield (28.2 mg, 0.05 mmol) with 97% ee.  $R_f = 0.4$  (PE/EtOAc = 3/1). m.p.: 95–97 °C.

**$^1\text{H NMR}$**  (400 MHz,  $\text{CDCl}_3$ ):  $\delta$  8.54 (d,  $J = 7.9$  Hz, 1H), 8.32 (dt,  $J = 4.8, 1.3$  Hz, 1H), 7.82 (dt,  $J = 7.8, 1.3$  Hz, 1H), 7.69 – 7.65 (m, 1H), 7.60 – 7.55 (m, 2H), 7.52 (d,  $J = 8.0$  Hz, 1H), 7.35 (t,  $J = 8.6$  Hz, 3H), 7.30 – 7.27 (m, 1H), 7.24 – 7.18 (m, 2H), 7.11 – 7.08 (m, 2H), 7.03 (d,  $J = 8.1$  Hz, 1H), 6.41 (dd,  $J = 3.8, 0.9$  Hz, 1H) ppm.

**$^{13}\text{C NMR}$**  (100 MHz,  $\text{CDCl}_3$ ):  $\delta$  160.90, 146.90, 144.36, 140.95, 139.14, 136.85, 135.51, 133.77, 132.01, 131.78, 131.42, 131.06, 130.74, 130.37, 130.16, 130.07, 129.86, 129.75, 129.42, 129.28, 128.99, 128.58, 128.10, 127.59, 125.83, 125.66, 125.60, 125.38, 125.34, 124.88, 124.42, 124.38, 124.32, 124.28, 122.63, 122.17, 119.92, 119.46, 118.82, 118.43, 117.66, 101.45 ppm (coupling constants were difficult to provide owing to overlap posed by two very similar  $\text{CF}_3$  groups). **HRMS (ESI)**  $m/z$ :  $[\text{M}+\text{H}]^+$  Calcd  $\text{C}_{30}\text{H}_{18}\text{F}_6\text{N}_3\text{O}$ : 550.1351; Found: 550.1348.

$[\alpha]_{\text{D}}^{25} = +126.0$  ( $c = 0.1, \text{CH}_2\text{Cl}_2$ ).

**HPLC conditions:** Daicel Chiralpak ID-3 column (85:15 *n*-hexane: 2-propanol, 1.0 mL/min, 27 °C, 254 nm);  $t_r$  (minor) = 9.8 min,  $t_r$  (major) = 11.0 min, 97% ee.

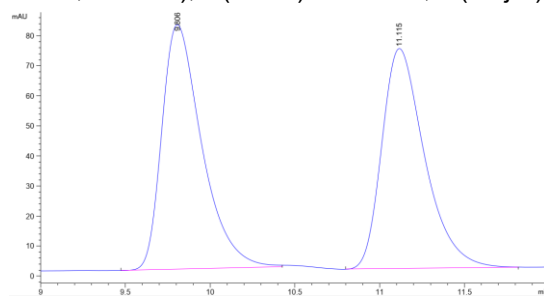

| No. | Time | Area   | Area (%) |
|-----|------|--------|----------|
| 1   | 9.8  | 1334.6 | 50.9174  |
| 2   | 11.1 | 1286.5 | 49.0826  |

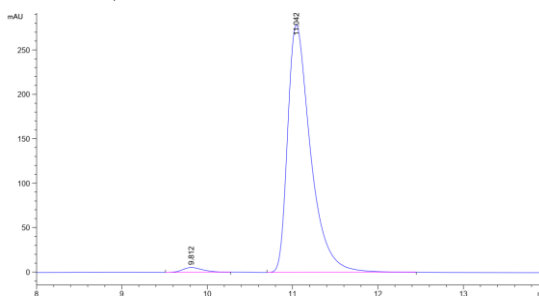

| No. | Time | Area   | Area (%) |
|-----|------|--------|----------|
| 1   | 9.8  | 88.5   | 1.6748   |
| 2   | 11.0 | 5195.6 | 98.3252  |

**(R)-2-(1H-pyrrolo[2,3-b]pyridin-1-yl)-3,4-di(thiophen-2-yl)isoquinolin-1(2H)-one (10)**

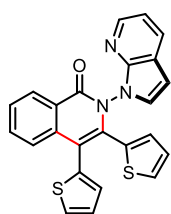

Following the general procedure, the title compound was obtained as gray-black oily liquid in 69% yield (23.5 mg, 0.06 mmol) with 97% ee.  $R_f = 0.5$  (PE/EtOAc = 3/1).

**$^1\text{H NMR}$**  (400 MHz,  $\text{CDCl}_3$ ):  $\delta$  8.50 (dd,  $J = 8.3, 1.1$  Hz, 1H), 8.35 (dd,  $J = 4.8, 1.5$  Hz, 1H), 7.86 (dd,  $J = 7.8, 1.5$  Hz, 1H), 7.71 – 7.67 (m, 1H), 7.59 – 7.55 (m, 1H), 7.53 – 7.50 (m, 1H), 7.30 (ddd,  $J = 4.8, 1.5, 0.5$  Hz, 1H), 7.15 (d,  $J =$

3.8 Hz, 1H), 7.11 (ddd,  $J = 7.8, 4.8, 0.5$  Hz, 1H), 7.03 (ddd,  $J = 5.1, 1.1, 0.5$  Hz, 1H), 7.00 – 6.97 (m, 2H), 6.78 (ddd,  $J = 3.6, 1.2, 0.6$  Hz, 1H), 6.54 (ddd,  $J = 5.1, 3.6, 0.5$  Hz, 1H), 6.46 (dd,  $J = 3.8, 0.5$  Hz, 1H) ppm.

**$^{13}\text{C NMR}$**  (100 MHz,  $\text{CDCl}_3$ ):  $\delta$  161.05, 147.02, 144.31, 137.60, 137.25, 136.21, 133.65, 131.75, 130.69, 130.20, 129.70, 128.94, 128.70, 128.10, 127.91, 127.03, 126.79, 126.33, 125.88, 125.46, 118.83, 117.44, 115.00, 100.88 ppm.

**HRMS (ESI)**  $m/z$ :  $[\text{M}+\text{H}]^+$  Calcd for  $\text{C}_{24}\text{H}_{16}\text{N}_3\text{OS}_2$ : 426.0735; Found: 426.0728.

$[\alpha]_{\text{D}}^{25} = +378.7$  ( $c = 0.1, \text{CH}_2\text{Cl}_2$ ).

**HPLC conditions:** Daicel Chiralpak ID-3 column (80:20 *n*-hexane: 2-propanol, 1.0 mL/min, 30°C, 254 nm);  $t_r$  (minor) = 23.7 min,  $t_r$  (major) = 33.2 min, 97% ee.

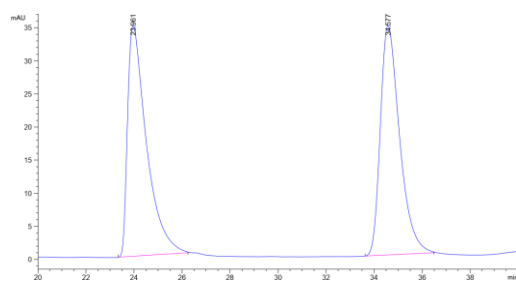

| No. | Time | Area   | Area (%) |
|-----|------|--------|----------|
| 1   | 24.0 | 1907.3 | 49.6753  |
| 2   | 34.6 | 1932.2 | 50.3247  |

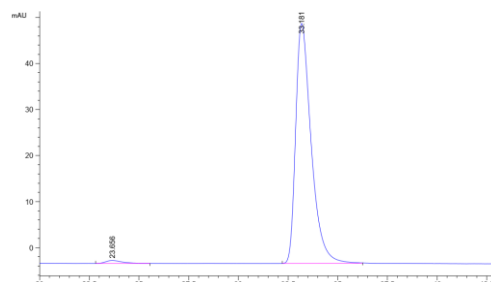

| No. | Time | Area   | Area (%) |
|-----|------|--------|----------|
| 1   | 24.0 | 37.5   | 1.3089   |
| 2   | 33.2 | 1468.1 | 98.6911  |

(*R*)-3,4-dipropyl-2-(1H-pyrrolo[2,3-*b*]pyridin-1-yl)isoquinolin-1(2H)-one (**11**)

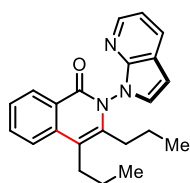

Following the general procedure, the title compound was obtained as white solid in 63% yield (17.5 mg, 0.05 mmol) with 97% ee.  $R_f$  = 0.5 (PE/EtOAc =2/1). m.p.: 126–128 °C.

**$^1\text{H NMR}$**  (400 MHz,  $\text{CDCl}_3$ ):  $\delta$  8.38 (dt,  $J$  = 8.0, 1.1 Hz, 1H), 8.30 (dd,  $J$  = 4.8, 1.5 Hz, 1H), 7.99 (dd,  $J$  = 7.8, 1.5 Hz, 1H), 7.72 (dd,  $J$  = 2.1, 1.1 Hz, 1H), 7.71 (d,  $J$  = 1.1 Hz, 1H), 7.44 (ddd,  $J$  = 8.1, 5.2, 3.0 Hz, 1H), 7.28 (d,  $J$  = 3.8 Hz, 1H), 7.15 (dd,  $J$  = 7.8, 4.8 Hz, 1H), 6.70 (d,  $J$  = 3.8 Hz, 1H), 2.77 (t,  $J$  = 8.3 Hz, 2H), 2.63 – 2.56 (m, 1H), 2.43 – 2.34 (m, 1H), 1.76 – 1.68 (m, 2H), 1.54 – 1.48 (m, 2H), 1.12 (t,  $J$  = 7.3 Hz, 3H), 0.74 (t,  $J$  = 7.3 Hz, 3H) ppm.

**$^{13}\text{C NMR}$**  (100 MHz,  $\text{CDCl}_3$ ):  $\delta$  161.61, 147.41, 144.61, 141.48, 137.20, 133.22, 129.83, 129.81, 128.95, 126.37, 125.30, 123.37, 119.23, 117.63, 114.53, 101.21, 31.28, 30.27, 23.64, 23.47, 14.72, 14.44 ppm.

**HRMS (ESI)**  $m/z$ :  $[\text{M}+\text{H}]^+$  Calcd for  $\text{C}_{22}\text{H}_{24}\text{N}_3\text{O}$ : 346.1919; Found: 346.1910.

$[\alpha]_D^{25}$  = -216.0 ( $c$  = 0.1,  $\text{CH}_2\text{Cl}_2$ ).

**HPLC conditions:** Daicel Chiralpak ID-3 column (80:20 *n*-hexane: 2-propanol, 1.0 mL/min, 30°C, 254 nm);  $t_r$  (minor) = 27.5 min,  $t_r$  (major) = 33.9 min, 97% ee.

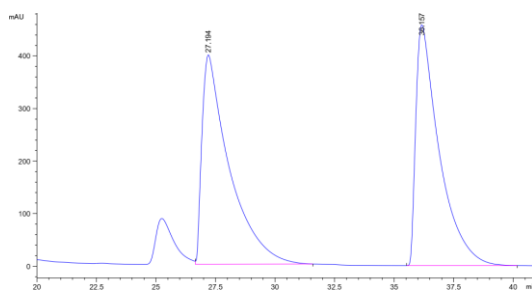

| No. | Time | Area    | Area (%) |
|-----|------|---------|----------|
| 1   | 27.2 | 31760.5 | 50.3894  |
| 2   | 36.2 | 31269.6 | 49.6106  |

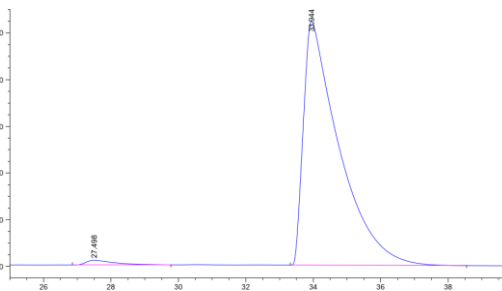

| No. | Time | Area    | Area (%) |
|-----|------|---------|----------|
| 1   | 27.5 | 1171.3  | 1.5060   |
| 2   | 33.9 | 76603.1 | 98.4940  |

(*R*)-3,4-diphenethyl-2-(1H-pyrrolo[2,3-*b*]pyridin-1-yl)isoquinolin-1(2H)-one (**12**)

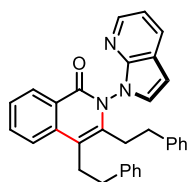

Following the general procedure, the title compound was obtained as white solid in 35% yield (13.1 mg, 0.03 mmol) with 98% ee.  $R_f$  = 0.4 (PE/EtOAc =2/1). m.p.: 136–138 °C.

**$^1\text{H NMR}$**  (400 MHz,  $\text{CDCl}_3$ ):  $\delta$  8.48 (dd,  $J$  = 8.0, 1.1 Hz, 1H), 8.35 (dd,  $J$  =

4.7, 1.4 Hz, 1H), 8.05 (dd,  $J = 7.9, 1.5$  Hz, 1H), 7.87 (d,  $J = 8.2$  Hz, 1H), 7.81 (ddd,  $J = 8.3, 7.1, 1.4$  Hz, 1H), 7.54 – 7.52 (m, 1H), 7.39 – 7.36 (m, 2H), 7.30 – 7.27 (m, 4H), 7.20 (dd,  $J = 7.9, 4.7$  Hz, 1H), 7.17 – 7.12 (m, 3H), 6.77 – 6.72 (m, 3H), 3.18 – 3.09 (m, 2H), 3.07 – 2.96 (m, 2H), 2.80 – 2.75 (m, 2H), 2.74 – 2.69 (m, 2H) ppm.

$^{13}\text{C}$  NMR (100 MHz,  $\text{CDCl}_3$ ):  $\delta$  161.51, 147.34, 144.69, 141.30, 140.88, 140.50, 136.70, 133.47, 129.89, 129.56, 129.15, 128.71, 128.55, 128.37, 128.03, 126.70, 126.44, 126.32, 125.49, 123.13, 119.20, 117.73, 113.82, 101.44, 36.19, 35.69, 31.70, 30.09 ppm.

**HRMS (ESI)**  $m/z$ :  $[\text{M}+\text{H}]^+$  Calcd for  $\text{C}_{32}\text{H}_{28}\text{N}_3\text{O}$ : 470.2232; Found: 470.2233.

$[\alpha]_{\text{D}}^{25} = +58.0$  ( $c = 0.1, \text{CH}_2\text{Cl}_2$ ).

**HPLC conditions:** Daicel Chiralpak ID-3 column (80:20 *n*-hexane: 2-propanol, 1.0 mL/min, 30°C, 254 nm);  $t_{\text{r}}$  (minor) = 25.4 min,  $t_{\text{r}}$  (major) = 44.2 min, 98% ee.

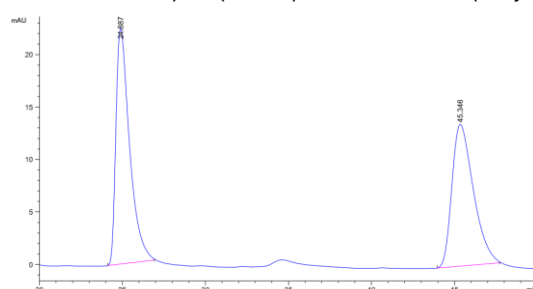

| No. | Time | Area   | Area (%) |
|-----|------|--------|----------|
| 1   | 24.9 | 1285.0 | 51.4390  |
| 2   | 45.3 | 1213.1 | 48.5610  |

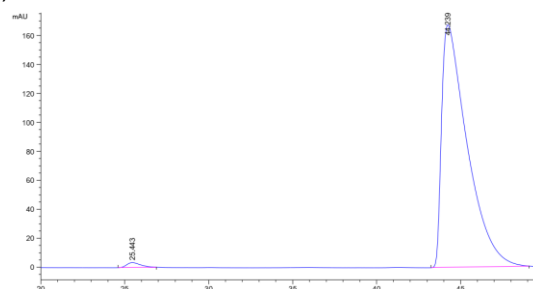

| No. | Time | Area    | Area (%) |
|-----|------|---------|----------|
| 1   | 25.4 | 195.4   | 1.0916   |
| 2   | 44.2 | 17705.8 | 98.9084  |

**(*R*)-4-ethyl-3-phenyl-2-(1H-pyrrolo[2,3-*b*]pyridin-1-yl)isoquinolin-1(2H)-one (13)**

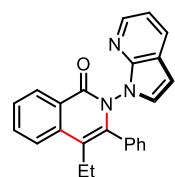

Following the general procedure, the title compound was obtained as white solid in 65% yield (19.0 mg, 0.05 mmol) with 99% ee.  $R_{\text{f}} = 0.4$  (PE/EtOAc = 3/1). m.p.: 158–160 °C.

$^1\text{H}$  NMR (400 MHz,  $\text{CDCl}_3$ ):  $\delta$  8.53 – 8.51 (m, 1H), 8.30 – 8.28 (m, 1H), 7.83 – 7.79 (m, 2H), 7.77 – 7.74 (m, 1H), 7.57 – 7.53 (m, 1H), 7.29 (d,  $J = 7.8$  Hz, 1H), 7.25 – 7.23 (m, 2H), 7.15 (t,  $J = 7.4$  Hz, 1H), 7.06 – 7.02 (m, 2H), 6.97 – 6.93 (m, 1H), 6.32 (d,  $J = 3.8$  Hz, 1H), 2.59 – 2.48 (m, 2H), 1.15 (t,  $J = 7.5$  Hz, 3H) ppm.

$^{13}\text{C}$  NMR (100 MHz,  $\text{CDCl}_3$ ):  $\delta$  161.13, 146.74, 144.10, 141.04, 136.62, 133.40, 132.63, 129.42, 129.28, 129.24, 128.89, 128.78, 127.69, 127.12, 126.17, 123.93, 118.64, 117.49, 117.15, 100.43, 21.86, 14.80 ppm.

**HRMS (ESI)**  $m/z$ :  $[\text{M}+\text{H}]^+$  Calcd for  $\text{C}_{24}\text{H}_{20}\text{N}_3\text{O}$ : 366.1606; Found: 366.1622.

$[\alpha]_{\text{D}}^{25} = +34.3$  ( $c = 0.1, \text{CH}_2\text{Cl}_2$ ).

**HPLC conditions:** Daicel Chiralpak ID-3 column (80:20 *n*-hexane: 2-propanol, 1.0 mL/min, 27 °C, 254 nm);  $t_{\text{r}}$  (minor) = 29.9 min,  $t_{\text{r}}$  (major) = 40.2 min, 99% ee.

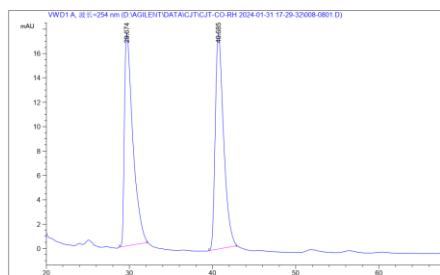

| No. | Time  | Area   | Area (%) |
|-----|-------|--------|----------|
| 1   | 29.67 | 1277.0 | 50.3500  |

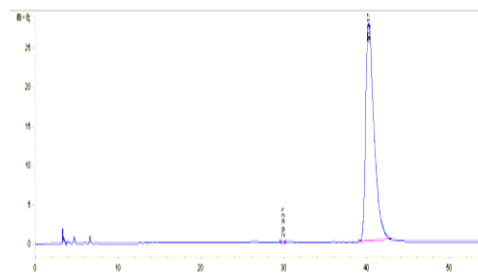

| No. | Time  | Area | Area (%) |
|-----|-------|------|----------|
| 1   | 29.93 | 9.4  | 0.4782   |



|   |       |        |         |
|---|-------|--------|---------|
| 2 | 40.68 | 1259.2 | 49.6500 |
|---|-------|--------|---------|

|   |       |        |         |
|---|-------|--------|---------|
| 2 | 40.21 | 1966.2 | 99.5218 |
|---|-------|--------|---------|

**(R)-3-phenyl-2-(1H-pyrrolo[2,3-b]pyridin-1-yl)isoquinolin-1(2H)-one (14)**

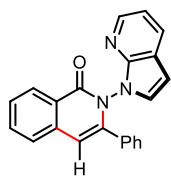

Following the general procedure, the title compound was obtained as white solid in 49% yield (13.5 mg, 0.04 mmol) with 99% ee.  $R_f = 0.7$  (PE/EtOAc = 2/1). m.p.: 142–144 °C.

**$^1\text{H NMR}$**  (400 MHz,  $\text{CDCl}_3$ ):  $\delta$  8.41 (d,  $J = 8.0$  Hz, 1H), 8.31 (dd,  $J = 4.8, 1.4$  Hz, 1H), 7.83 (dt,  $J = 7.8, 1.2$  Hz, 1H), 7.75 – 7.70 (m, 1H), 7.60 (d,  $J = 8.0$  Hz, 1H), 7.54 – 7.50 (m, 1H), 7.369 – 7.366 (m, 1H), 7.35 (t,  $J = 1.5$  Hz, 1H), 7.23 – 7.17 (m, 1H), 7.14 – 7.06 (m, 4H), 6.64 (s, 1H), 6.44 (dd,  $J = 3.8, 0.8$  Hz, 1H) ppm.

**$^{13}\text{C NMR}$**  (100 MHz,  $\text{CDCl}_3$ ):  $\delta$  161.73, 147.24, 144.59, 144.45, 136.76, 133.63, 133.55, 129.61, 129.09, 128.91, 128.74, 128.57, 127.88, 127.32, 126.56, 125.36, 118.83, 117.34, 107.89, 100.95 ppm.

**HRMS (ESI)**  $m/z$ :  $[\text{M}+\text{H}]^+$  Calcd for  $\text{C}_{22}\text{H}_{16}\text{N}_3\text{O}$ : 338.1293; Found: 338.1283.

$[\alpha]_D^{25} = +191.0$  ( $c = 0.1$ ,  $\text{CH}_2\text{Cl}_2$ ).

**HPLC conditions:** Daicel Chiralpak IB-3 column (70:30 *n*-hexane: 2-propanol, 1.0 mL/min, 30°C, 254 nm);  $t_r$  (minor) = 10.7 min,  $t_r$  (major) = 17.4 min, 99% ee.

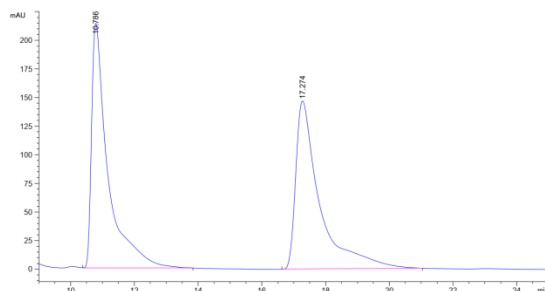

|   | Time | Area   | Area (%) |
|---|------|--------|----------|
| 1 | 10.8 | 7612.9 | 49.8038  |
| 2 | 17.3 | 7672.9 | 50.1962  |

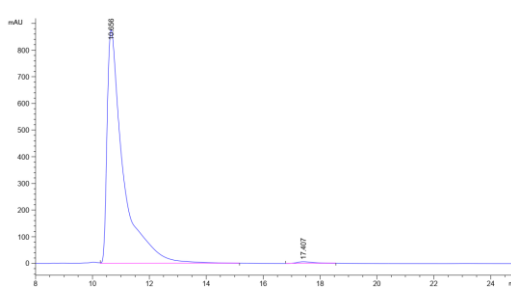

| No. | Time | Area     | Area (%) |
|-----|------|----------|----------|
| 1   | 10.7 | 34422.2e | 99.2758  |
| 2   | 17.4 | 251.1    | 0.7242   |

**(R)-4-phenyl-3-(phenylethynyl)-2-(1H-pyrrolo[2,3-b]pyridin-1-yl)isoquinolin-1(2H)-one (15)**

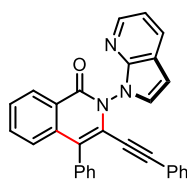

Following the general procedure, the title compound was obtained as white solid in 64% yield (22.4 mg, 0.05 mmol) with 97% ee.  $R_f = 0.4$  (PE/EtOAc = 3/1). m.p.: 180–182 °C.

**$^1\text{H NMR}$**  (400 MHz,  $\text{CDCl}_3$ ):  $\delta$  8.55 (dd,  $J = 8.0, 1.5$  Hz, 1H), 8.37 (dt,  $J = 5.1, 1.8$  Hz, 1H), 8.04 (dt,  $J = 7.8, 1.8$  Hz, 1H), 7.68 – 7.62 (m, 2H), 7.59 – 7.47 (m, 6H), 7.44 (d,  $J = 8.1$  Hz, 1H), 7.19 – 7.14 (m, 2H), 7.09 – 7.05 (m, 2H), 6.74 (dd,  $J = 3.8, 2.3$  Hz, 1H), 6.56 – 6.52 (m, 2H) ppm.

**$^{13}\text{C NMR}$**  (100 MHz,  $\text{CDCl}_3$ ):  $\delta$  160.73, 146.70, 144.61, 136.80, 135.36, 133.40, 131.50, 131.27, 131.04, 129.63, 129.07, 129.04, 128.81, 128.54, 128.39, 128.37, 128.17, 128.16, 126.27, 126.21, 126.19, 125.22, 121.36, 119.03, 117.49, 100.69, 98.51, 80.94 ppm.

**HRMS (ESI)**  $m/z$ :  $[\text{M}+\text{H}]^+$  Calcd for  $\text{C}_{30}\text{H}_{20}\text{N}_3\text{O}$ : 438.1606; Found: 438.1625.

$[\alpha]_D^{25} = +163.3$  ( $c = 0.1$ ,  $\text{CH}_2\text{Cl}_2$ ).

**HPLC conditions:** Daicel Chiralpak ID-3 column (80:20 *n*-hexane: 2-propanol, 1.0 mL/min, 27 °C, 254 nm);  $t_r$  (minor) = 25.2 min,  $t_r$  (major) = 33.9 min, 97% ee.

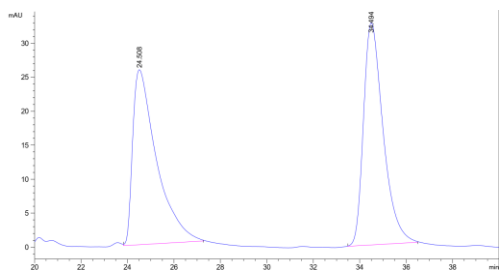

| No. | Time | Area   | Area (%) |
|-----|------|--------|----------|
| 1   | 24.5 | 1840.7 | 48.8393  |
| 2   | 34.5 | 1928.2 | 51.1607  |

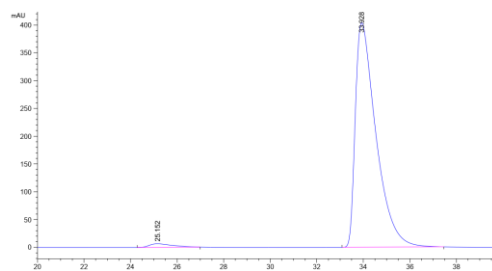

| No. | Time | Area    | Area (%) |
|-----|------|---------|----------|
| 1   | 25.2 | 452.0   | 1.7846   |
| 2   | 33.9 | 24878.0 | 98.2154  |

**(R)-4-(2-hydroxypropan-2-yl)-3-phenyl-2-(1H-pyrrolo[2,3-b]pyridin-1-yl)isoquinolin-1(2H)-one (16)**

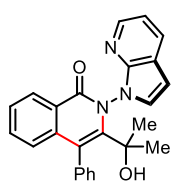

Following the general procedure, the title compound was obtained as black solid in 57% yield (18.0 mg, 0.05 mmol) with 99% ee.  $R_f = 0.4$  (PE/EtOAc = 1/1). m.p.: 85–87 °C.

**$^1\text{H NMR}$**  (400 MHz,  $\text{CDCl}_3$ ):  $\delta$  8.75 (d,  $J = 8.7$  Hz, 1H), 8.51 (d,  $J = 9.6$  Hz, 1H), 8.28 (d,  $J = 6.2$  Hz, 1H), 7.77 – 7.72 (m, 2H), 7.53 (ddd,  $J = 8.1, 7.1, 1.0$  Hz, 1H), 7.26 – 7.23 (m, 1H), 7.20 – 7.16 (m, 2H), 7.12 – 7.08 (m, 1H), 7.04 (ddd,  $J = 7.8, 4.8, 0.5$  Hz, 1H), 6.91 (d,  $J = 3.8$  Hz, 1H), 6.86 – 6.81 (m, 1H), 6.28 (d,  $J = 3.8$  Hz, 1H), 1.83 (s, 1H), 1.54 (s, 3H), 1.37 (s, 3H) ppm.

**$^{13}\text{C NMR}$**  (100 MHz,  $\text{CDCl}_3$ ): 160.78, 146.79, 144.01, 140.32, 136.30, 134.41, 132.28, 129.80, 129.72, 129.41, 129.11, 128.92, 127.31, 127.09, 126.99, 126.51, 122.42, 122.41, 118.55, 117.19, 100.46, 74.25, 33.76, 32.70 ppm.

**HRMS (ESI)**  $m/z$ :  $[\text{M}+\text{H}]^+$  Calcd for  $\text{C}_{25}\text{H}_{22}\text{N}_3\text{O}_2$ : 396.1712; Found: 396.1737.

$[\alpha]_D^{25} = +130.5$  ( $c = 0.1$ ,  $\text{CH}_2\text{Cl}_2$ ).

**HPLC conditions:** Daicel Chiralpak ID-3 column (80:20 *n*-hexane: 2-propanol, 1.0 mL/min, 27 °C, 254 nm);  $t_r$  (minor) = 20.3 min,  $t_r$  (major) = 27.1 min, 99% ee.

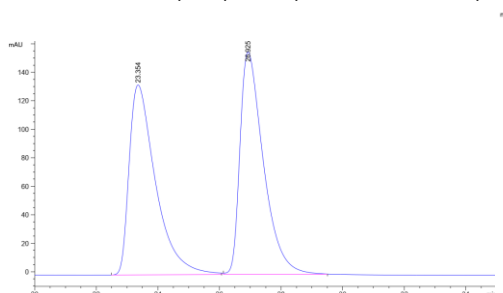

| No. | Time | Area   | Area (%) |
|-----|------|--------|----------|
| 1   | 23.4 | 7953.9 | 49.1025  |
| 2   | 26.9 | 8244.7 | 50.8975  |

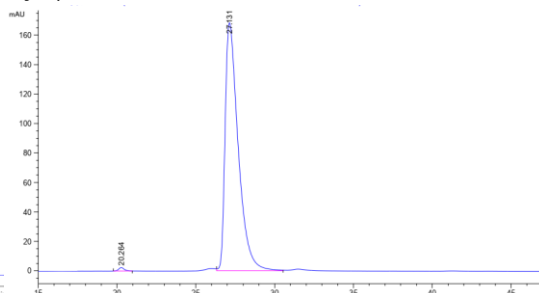

| No. | Time | Area   | Area (%) |
|-----|------|--------|----------|
| 1   | 20.3 | 58.8   | 0.6004   |
| 2   | 27.1 | 9598.9 | 99.3996  |

**(R)-3-phenyl-2-(1H-pyrrolo[2,3-b]pyridin-1-yl)-4-(trimethylsilyl)isoquinolin-1(2H)-one (17)**

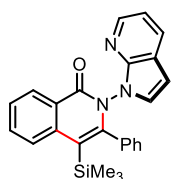

Following the general procedure, the title compound was obtained as white solid in 41% yield (13.4 mg, 0.03 mmol) with 87% ee.  $R_f = 0.4$  (PE/EtOAc = 2/1). m.p.: 72–74 °C.

**$^1\text{H NMR}$**  (400 MHz,  $\text{CDCl}_3$ ):  $\delta$  8.49 (dt,  $J = 8.0, 1.5$  Hz, 1H), 8.30 (dt,  $J = 4.6,$

1.6 Hz, 1H), 7.96 (d,  $J = 9.0$  Hz, 1H), 7.78 – 7.71 (m, 2H), 7.54 – 7.49 (m, 1H), 7.29 – 7.27 (m, 1H), 7.24 – 7.21 (m, 2H), 7.15 – 7.10 (m, 1H), 7.07 – 7.03 (m, 1H), 6.95 (dd,  $J = 3.7, 1.8$  Hz, 1H), 6.89 – 6.83 (m, 1H), 6.31 (dd,  $J = 3.8, 2.0$  Hz, 1H), 0.02 – 0.00 (m, 9H) ppm.

$^{13}\text{C}$  NMR (100 MHz,  $\text{CDCl}_3$ ):  $\delta$  161.27, 149.30, 146.90, 144.09, 139.82, 134.77, 132.53, 130.29, 130.05, 129.42, 129.13, 129.11, 128.91, 127.92, 127.27, 127.17, 126.71, 126.20, 118.63, 117.14, 113.30, 100.50, 1.97 ppm.

**HRMS (ESI)**  $m/z$ :  $[\text{M}+\text{H}]^+$  Calcd for  $\text{C}_{25}\text{H}_{24}\text{N}_3\text{OSi}$ : 410.1689; Found: 410.1670.

$[\alpha]_{\text{D}}^{25} = +61.0$  ( $c = 0.1, \text{CH}_2\text{Cl}_2$ ).

**HPLC conditions:** Daicel Chiralpak ID-3 column (94:6 *n*-hexane: 2-propanol, 1.0 mL/min, 27 °C, 254 nm);  $t_{\text{r}}$  (minor) = 13.2 min,  $t_{\text{r}}$  (major) = 16.3 min, 87% ee.

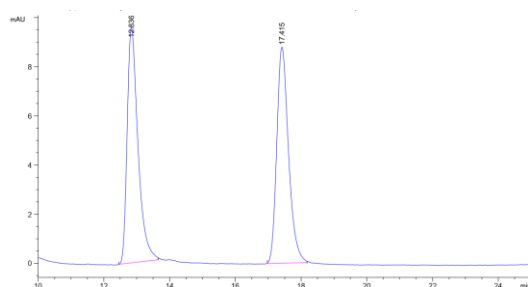

| No. | Time | Area  | Area (%) |
|-----|------|-------|----------|
| 1   | 12.8 | 219.1 | 50.0683  |
| 2   | 17.4 | 218.5 | 49.9317  |

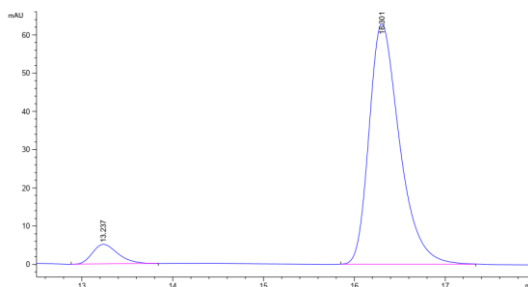

| No. | Time | Area   | Area (%) |
|-----|------|--------|----------|
| 1   | 13.2 | 100.7  | 6.4164   |
| 2   | 16.3 | 1468.1 | 93.5836  |

**(R)-4-chloro-3-phenyl-2-(1H-pyrrolo[2,3-b]pyridin-1-yl)isoquinolin-1(2H)-one (18)**

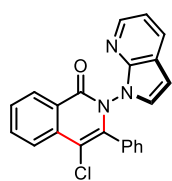

Following the general procedure, the title compound was obtained as white solid in 45% yield (13.4 mg, 0.04 mmol) with 95% ee.  $R_{\text{f}} = 0.7$  (PE/EtOAc = 3/1). m.p.: 110–112 °C.

$^1\text{H}$  NMR (400 MHz,  $\text{CDCl}_3$ ):  $\delta$  8.49 (d,  $J = 8.0$  Hz, 1H), 8.30 (d,  $J = 4.7$  Hz, 1H), 8.09 (d,  $J = 8.1$  Hz, 1H), 7.88 – 7.84 (m, 1H), 7.79 – 7.77 (m, 1H), 7.63 (t,  $J = 7.6$  Hz, 1H), 7.37 (d,  $J = 7.6$  Hz, 1H), 7.29 (t,  $J = 6.2$  Hz, 2H), 7.21 – 7.17 (m, 1H), 7.08 – 7.05 (m, 2H), 7.00 (t,  $J = 7.6$  Hz, 1H), 6.36 (d,  $J = 3.8$  Hz, 1H) ppm.

$^{13}\text{C}$  NMR (100 MHz,  $\text{CDCl}_3$ ):  $\delta$  160.65, 146.79, 144.36, 141.56, 135.08, 134.15, 131.56, 129.57, 129.41, 129.25, 129.05, 128.65, 128.43, 127.85, 127.84, 125.36, 124.59, 118.68, 117.47, 111.82, 100.92 ppm.

**HRMS (ESI)**  $m/z$ :  $[\text{M}+\text{H}]^+$  Calcd for  $\text{C}_{22}\text{H}_{15}\text{ClN}_3\text{O}$ : 372.0904; Found: 372.0888.

$[\alpha]_{\text{D}}^{25} = +14.3$  ( $c = 0.1, \text{CH}_2\text{Cl}_2$ ).

**HPLC conditions:** Daicel Chiralpak IE-3 column (80:20 *n*-hexane: 2-propanol, 1.0 mL/min, 30 °C, 254 nm);  $t_{\text{r}}$  (minor) = 29.1 min,  $t_{\text{r}}$  (major) = 54.3 min, 95% ee.

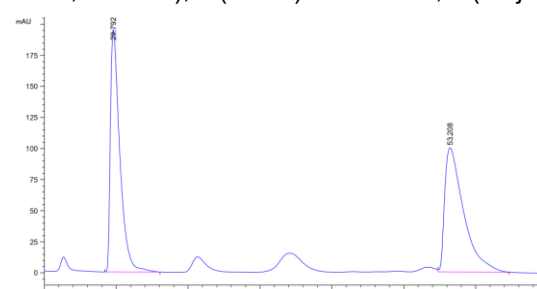

| No. | Time | Area   | Area (%) |
|-----|------|--------|----------|
| 1   | 29.8 | 8905.4 | 49.3347  |
| 2   | 53.2 | 9145.6 | 50.6653  |

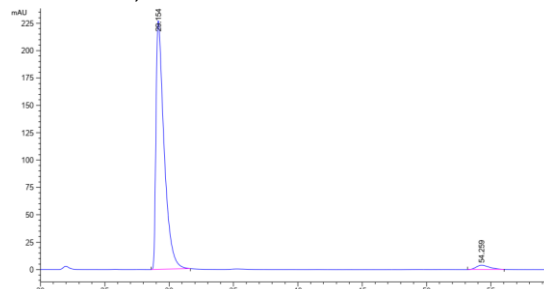

| No. | Time | Area    | Area (%) |
|-----|------|---------|----------|
| 1   | 29.1 | 10006.2 | 97.3764  |
| 2   | 54.3 | 269.6   | 2.6236   |

(*R*)-3-butyl-4-(phenylthio)-2-(1H-pyrrolo[2,3-*b*]pyridin-1-yl)isoquinolin-1(2H)-one (**19**)

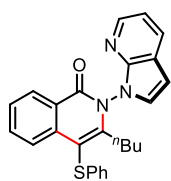

Following the general procedure, the title compound was obtained as black solid in 32% yield (10.9 mg, 0.03 mmol) with 98% ee.  $R_f = 0.7$  (PE/EtOAc =3/1). m.p.: 50–52 °C.

**$^1\text{H NMR}$**  (400 MHz,  $\text{CDCl}_3$ ):  $\delta$  8.37 (d,  $J = 8.0$  Hz, 1H), 8.32 (d,  $J = 4.7$  Hz, 1H), 8.11 (d,  $J = 8.3$  Hz, 1H), 8.00 (dt,  $J = 7.9, 1.2$  Hz, 1H), 7.67–7.64 (m, 1H), 7.48–7.44 (m, 1H), 7.32 (d,  $J = 3.4$  Hz, 1H), 7.24 (d,  $J = 7.7$  Hz, 2H), 7.17 (dd,  $J = 7.8, 1.8$  Hz, 3H), 7.14–7.10 (m, 1H), 6.72 (dd,  $J = 3.8, 0.8$  Hz, 1H), 3.12–3.04 (m, 1H), 2.72–2.65 (m, 1H), 1.52–1.44 (m, 2H), 1.12–1.02 (m, 2H), 0.56 (t,  $J = 7.3$  Hz, 3H) ppm.

**$^{13}\text{C NMR}$**  (100 MHz,  $\text{CDCl}_3$ ):  $\delta$  161.68, 153.40, 147.19, 144.73, 137.88, 137.51, 134.04, 129.91, 129.36, 129.23, 128.74, 127.27, 126.04, 125.83, 125.41, 125.08, 119.21, 117.88, 105.83, 101.53, 31.80, 31.68, 22.61, 13.24 ppm.

**HRMS (ESI)**  $m/z$ :  $[\text{M}+\text{H}]^+$  Calcd for  $\text{C}_{26}\text{H}_{24}\text{N}_3\text{OS}$ : 426.1640; Found: 426.1619.

$[\alpha]_{\text{D}}^{25} = +34.7$  ( $c = 0.1$ ,  $\text{CH}_2\text{Cl}_2$ ).

**HPLC conditions:** Daicel Chiralpak ID-3 column (70:30 *n*-hexane: 2-propanol, 1.0 mL/min, 30°C, 254 nm);  $t_r$  (minor) = 19.3 min,  $t_r$  (major) = 21.6 min, 98% ee.

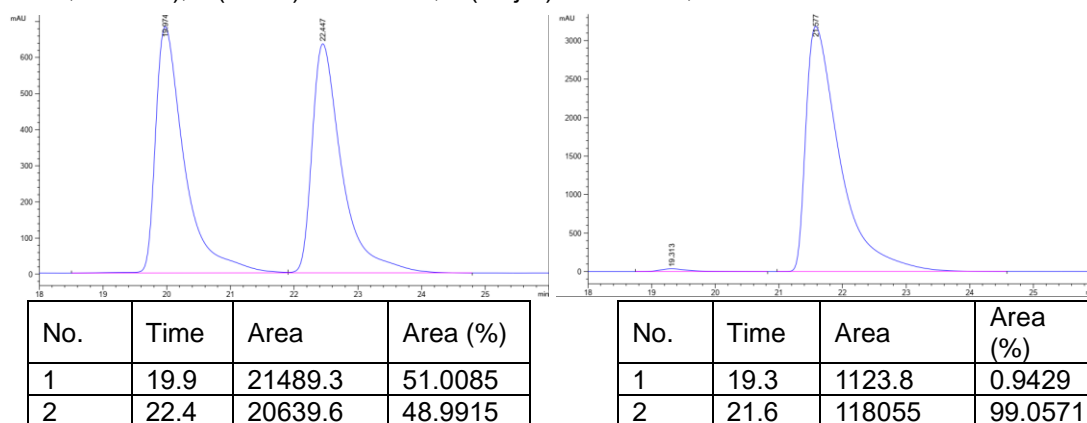

(*S*)-4-butyl-3-(phenylthio)-2-(1H-pyrrolo[2,3-*b*]pyridin-1-yl)isoquinolin-1(2H)-one (**19'**)

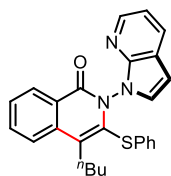

Following the general procedure, the title compound was obtained as white solid in 50% yield (17.0 mg, 0.04 mmol) with >99% ee.  $R_f = 0.5$  (PE/EtOAc =3/1). m.p.: 54–56 °C.

**$^1\text{H NMR}$**  (400 MHz,  $\text{CDCl}_3$ ):  $\delta$  8.48–8.46 (m, 1H), 8.14 (dt,  $J = 4.7, 1.3$  Hz, 1H), 7.88–7.79 (m, 3H), 7.60–7.56 (m, 1H), 7.11–7.05 (m, 3H), 7.03 (ddd,  $J = 7.7, 4.8, 1.2$  Hz, 1H), 6.99–6.96 (m, 2H), 6.77 (d,  $J = 3.8$  Hz, 1H), 6.41–6.40 (m, 1H), 3.31–3.15 (m, 2H), 1.65 (d,  $J = 5.9$  Hz, 2H), 1.50 (dt,  $J = 14.8, 7.3$  Hz, 2H), 0.97 (t,  $J = 7.3$  Hz, 3H) ppm.

**$^{13}\text{C NMR}$**  (100 MHz,  $\text{CDCl}_3$ ):  $\delta$  161.64, 146.67, 144.10, 136.01, 134.70, 133.95, 133.63, 129.40, 129.33, 129.27, 129.06, 128.38, 127.89, 127.61, 127.07, 126.78, 124.76, 118.80, 117.20, 100.12, 32.59, 30.97, 23.19, 14.03 ppm.

**HRMS (ESI)**  $m/z$ :  $[\text{M}+\text{H}]^+$  Calcd for  $\text{C}_{26}\text{H}_{24}\text{N}_3\text{OS}$ : 426.1640; Found: 426.1623.

$[\alpha]_{\text{D}}^{25} = -44.2$  ( $c = 0.1$ ,  $\text{CH}_2\text{Cl}_2$ ).

**HPLC conditions:** Daicel Chiralpak ID-3 column (70:30 *n*-hexane: 2-propanol, 1.0 mL/min, 30°C, 254 nm);  $t_r$  (minor) = 10.5 min,  $t_r$  (major) = 14.2 min, >99% ee.

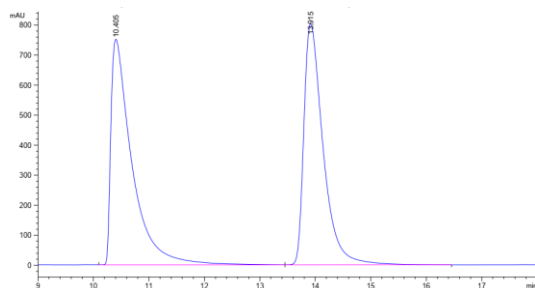

| No. | Time | Area    | Area (%) |
|-----|------|---------|----------|
| 1   | 10.4 | 19953.3 | 50.6828  |
| 2   | 13.9 | 19415.7 | 49.3172  |

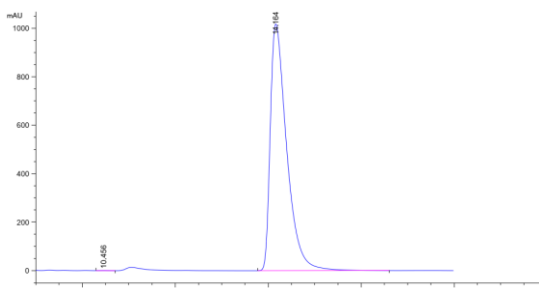

| No. | Time | Area    | Area (%) |
|-----|------|---------|----------|
| 1   | 10.5 | 10.4    | 0.0418   |
| 2   | 14.2 | 24977.7 | 99.9582  |

**(R)-1-oxo-3-phenyl-2-(1H-pyrrolo[2,3-b]pyridin-1-yl)-1,2-dihydroisoquinoline-4-carbonitrile (20)**

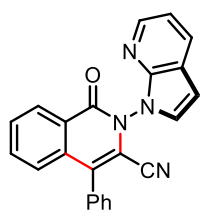

Following the general procedure, the title compound was obtained as white solid in 43% yield (12.5 mg, 0.03 mmol) with 93% ee.  $R_f = 0.4$  (PE/EtOAc = 3/1). m.p.: 189–191 °C.

**<sup>1</sup>H NMR** (400 MHz, CDCl<sub>3</sub>): δ 8.54 – 8.52 (m, 1H), 8.35 (dd,  $J = 4.8, 1.5$  Hz, 1H), 8.02 (dd,  $J = 7.8, 1.5$  Hz, 1H), 7.77 – 7.68 (m, 2H), 7.62 – 7.54 (m, 4H), 7.53 – 7.49 (m, 1H), 7.47 – 7.45 (m, 1H), 7.41 (d,  $J = 3.9$  Hz, 1H),

7.21 (dd,  $J = 7.8, 4.8$  Hz, 1H), 6.76 (d,  $J = 3.9$  Hz, 1H) ppm.

**<sup>13</sup>C NMR** (100 MHz, CDCl<sub>3</sub>): δ 160.36, 153.86, 146.84, 144.60, 134.99, 133.43, 130.74, 130.23, 129.88, 129.18, 129.06, 128.61, 128.31, 128.27, 125.00, 124.51, 118.72, 117.87, 115.26, 101.72, 93.41 ppm.

**HRMS (ESI)**  $m/z$ : [M+H]<sup>+</sup> Calcd for C<sub>23</sub>H<sub>15</sub>N<sub>4</sub>O: 363.1246; Found: 363.1235.

$[\alpha]_D^{25} = +76.3$  ( $c = 0.1$ , CH<sub>2</sub>Cl<sub>2</sub>).

**HPLC conditions:** Daicel Chiralpak ID-3 column (70:30 *n*-hexane: 2-propanol, 1.0 mL/min, 30°C, 254 nm);  $t_r$  (minor) = 15.8 min,  $t_r$  (major) = 17.0 min, 93% ee.

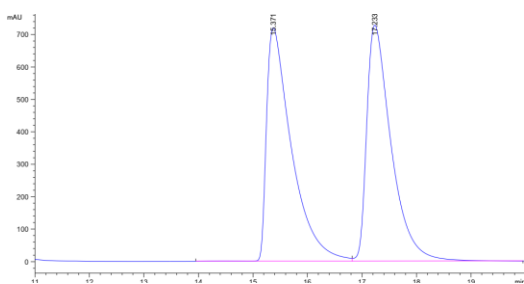

| No. | Time | Area    | Area (%) |
|-----|------|---------|----------|
| 1   | 15.4 | 22929.9 | 50.2721  |
| 2   | 17.2 | 22681.7 | 49.7279  |

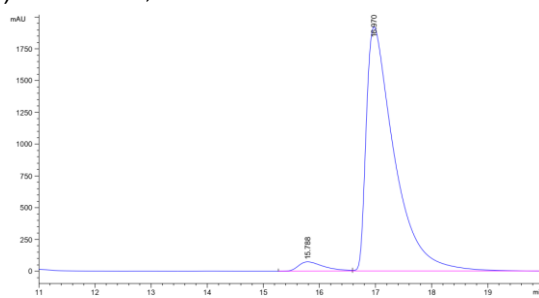

| No. | Time | Area    | Area (%) |
|-----|------|---------|----------|
| 1   | 15.8 | 2349.7  | 3.3984   |
| 2   | 17.0 | 66792.8 | 96.6016  |

**(R)-ethyl 1-oxo-4-phenyl-2-(1H-pyrrolo[2,3-b]pyridin-1-yl)-1,2-dihydroisoquinoline-3-carboxylate (21)**

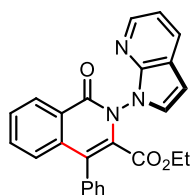

Following the general procedure, the title compound was obtained as white solid in 34% yield (11.1 mg, 0.03 mmol) with 97% ee.  $R_f = 0.5$  (DCM/EtOAc = 50/1). m.p.: 78–79 °C.

**<sup>1</sup>H NMR** (400 MHz, CDCl<sub>3</sub>): δ 8.46 (d,  $J = 8.0$  Hz, 1H), 8.30 (d,  $J = 4.7$  Hz, 1H), 7.87 – 7.83 (m, 1H), 7.81 – 7.76 (m, 2H), 7.60 – 7.55 (m, 1H), 7.35 (d,  $J = 7.5$  Hz, 1H), 7.30 (d,  $J = 7.8$  Hz, 1H), 7.24 – 7.14 (m, 2H), 7.07 (ddd,  $J =$

7.8, 4.8, 0.8 Hz, 1H), 7.03 (d,  $J = 3.8$  Hz, 1H), 6.95 (t,  $J = 7.6$  Hz, 1H), 6.38 (dd,  $J = 3.8, 0.8$  Hz, 1H), 3.97 (q,  $J = 7.1$  Hz, 2H), 0.83 – 0.78 (m, 3H) ppm.

$^{13}\text{C}$  NMR (100 MHz,  $\text{CDCl}_3$ ):  $\delta$  166.26, 160.87, 147.02, 144.84, 144.40, 134.02, 133.82, 131.90, 129.57, 129.37, 129.07, 128.99, 128.81, 128.64, 127.98, 127.53, 125.17, 124.89, 118.67, 117.47, 113.26, 101.08, 61.42, 13.53 ppm.

**HRMS (ESI)**  $m/z$ :  $[\text{M}+\text{H}]^+$  Calcd for  $\text{C}_{25}\text{H}_{20}\text{N}_3\text{O}_3$ : 410.1505; Found: 410.1502.

$[\alpha]_{\text{D}}^{25} = +117.7$  ( $c = 0.1$ ,  $\text{CH}_2\text{Cl}_2$ ).

**HPLC conditions:** Daicel Chiralpak ID-3 column (80:20 *n*-hexane: 2-propanol, 1.0 mL/min, 30°C, 254 nm);  $t_{\text{r}}$  (minor) = 15.3 min,  $t_{\text{r}}$  (major) = 23.0 min, 97% ee.

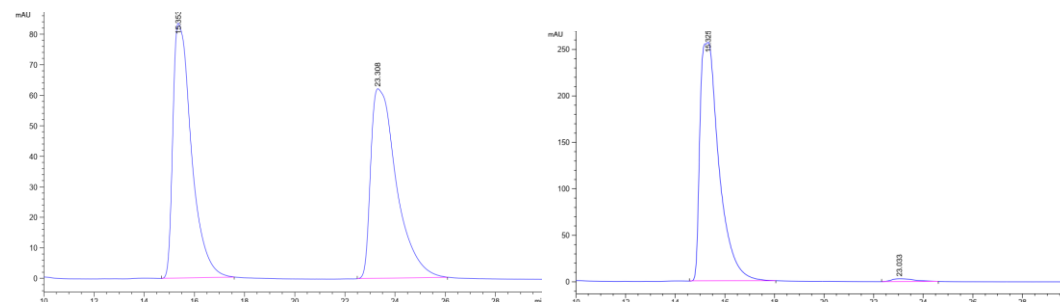

| No. | Time | Area   | Area(%) |
|-----|------|--------|---------|
| 1   | 15.4 | 4291.1 | 49.2324 |
| 2   | 23.3 | 4424.9 | 50.7676 |

| No. | Time | Area    | Area (%) |
|-----|------|---------|----------|
| 1   | 15.3 | 13692.7 | 98.6233  |
| 2   | 23.0 | 191.1   | 1.3767   |

(*R*)-ethyl 1-oxo-3-phenyl-2-(1*H*-pyrrolo[2,3-*b*]pyridin-1-yl)-1,2-dihydroisoquinoline-4-carboxylate (**21'**)

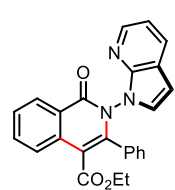

Following the general procedure, the title compound was obtained as white solid in 31% yield (8.2 mg, 0.02 mmol) with 47% ee.  $R_f = 0.7$  (DCM/EtOAc =50/1). m.p.: 76–78 °C.

$^1\text{H}$  NMR (400 MHz,  $\text{CDCl}_3$ ):  $\delta$  8.48 (d,  $J = 8.1$  Hz, 1H), 8.36 (d,  $J = 4.8$  Hz, 1H), 7.96 – 7.93 (m, 1H), 7.65 (t,  $J = 7.7$  Hz, 1H), 7.58 (d,  $J = 7.6$  Hz, 1H), 7.55 – 7.53 (m, 1H), 7.48 – 7.43 (m, 3H), 7.39 (dd,  $J = 9.5, 2.4$  Hz, 2H), 7.34 (d,  $J = 8.1$  Hz, 1H), 7.15 (dd,  $J = 7.8, 4.8$  Hz, 1H), 6.65 (d,  $J = 3.9$  Hz, 1H), 3.64 (q,  $J = 7.1$  Hz, 2H), 0.54 (t,  $J = 7.1$  Hz, 3H) ppm.

$^{13}\text{C}$  NMR (100 MHz,  $\text{CDCl}_3$ ):  $\delta$  161.48, 160.28, 147.36, 144.62, 136.82, 134.66, 133.73, 133.54, 131.12, 130.52, 129.72, 129.63, 128.87, 128.63, 128.61, 128.58, 128.48, 126.56, 126.07, 119.17, 118.67, 117.78, 101.59, 61.95, 13.10 ppm.

**HRMS (ESI)**  $m/z$ :  $[\text{M}+\text{H}]^+$  Calcd for  $\text{C}_{25}\text{H}_{20}\text{N}_3\text{O}_3$ : 2410.1505; Found: 410.1502.

$[\alpha]_{\text{D}}^{25} = +79.7$  ( $c = 0.1$ ,  $\text{CH}_2\text{Cl}_2$ ).

**HPLC conditions:** Daicel Chiralpak ID-3 column (60:40 *n*-hexane: 2-propanol, 1.0 mL/min, 30°C, 254 nm);  $t_{\text{r}}$  (minor) = 19.3 min,  $t_{\text{r}}$  (major) = 29.5 min, 47% ee.

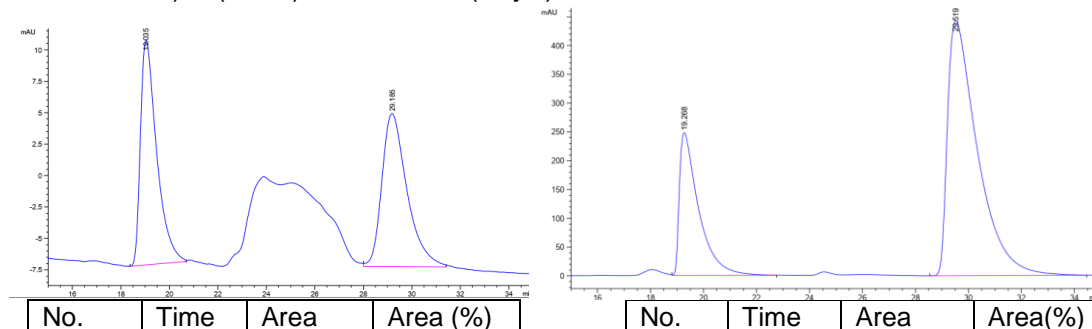

| No. | Time | Area | Area (%) |
|-----|------|------|----------|
|-----|------|------|----------|

| No. | Time | Area | Area(%) |
|-----|------|------|---------|
|-----|------|------|---------|

|   |      |       |         |
|---|------|-------|---------|
| 1 | 19.0 | 831.1 | 48.6299 |
| 2 | 29.2 | 878.0 | 51.3701 |

|   |      |         |         |
|---|------|---------|---------|
| 1 | 19.3 | 12552.5 | 26.5218 |
| 2 | 29.5 | 34776.5 | 73.4782 |

(S)-3-(diphenylphosphoryl)-2-(1H-pyrrolo[2,3-b]pyridin-1-yl)isoquinolin-1(2H)-one (**22**)

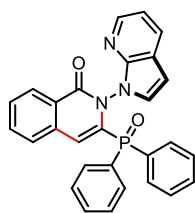

Following the general procedure, the title compound was obtained as white solid in 79% yield (27.7 mg, 0.06 mmol) with 99% ee.  $R_f = 0.3$  (PE/EtOAc = 1/2). m.p.: 178–180 °C.

**$^1\text{H NMR}$**  (400 MHz,  $\text{CDCl}_3$ ):  $\delta$  8.34 (d,  $J = 8.0$  Hz, 1H), 7.90 (d,  $J = 4.7$  Hz, 1H), 7.81 (dd,  $J = 12.1, 7.3$  Hz, 2H), 7.71 (t,  $J = 7.6$  Hz, 1H), 7.63 – 7.54 (m, 5H), 7.51 (d,  $J = 7.9$  Hz, 1H), 7.45 (td,  $J = 7.7, 3.2$  Hz, 2H), 7.36 (d,  $J = 3.9$  Hz, 1H), 7.21 – 7.16 (m, 1H), 7.12 (td,  $J = 7.3, 3.2$  Hz, 2H), 6.87 (dd,  $J = 7.8, 4.8$  Hz, 1H), 6.78 (d,  $J = 11.6$  Hz, 1H), 6.44 (d,  $J = 3.9$  Hz, 1H) ppm.

**$^{13}\text{C NMR}$**  (100 MHz,  $\text{CDCl}_3$ ):  $\delta$  161.13 (d,  $J_{\text{C-P}} = 2.6$  Hz), 147.35, 143.26, 138.91 (d,  $J_{\text{C-P}} = 107.0$  Hz), 134.68 (d,  $J_{\text{C-P}} = 13.1$  Hz), 133.52, 132.61 (d,  $J_{\text{C-P}} = 2.7$  Hz), 132.35 (d,  $J_{\text{C-P}} = 9.6$  Hz), 131.68 (d,  $J_{\text{C-P}} = 2.7$  Hz), 131.36, 130.79 (d,  $J_{\text{C-P}} = 10.3$  Hz), 130.11, 129.54, 129.38, 128.79, 128.73, 128.64, 128.63, 128.28, 127.95, 127.87, 127.86, 127.54, 127.07, 118.87, 117.73 (d,  $J_{\text{C-P}} = 12.0$  Hz), 117.15, 101.20 ppm.

**$^{31}\text{P NMR}$**  (162 MHz,  $\text{CDCl}_3$ ):  $\delta$  22.76 ppm.

**HRMS (ESI)** m/z:  $[\text{M}+\text{H}]^+$  Calcd for  $\text{C}_{28}\text{H}_{21}\text{N}_3\text{O}_2\text{P}$ : 462.1366; Found: 462.1365.

$[\alpha]_{\text{D}}^{25} = -31.0$  (c = 0.1,  $\text{CH}_2\text{Cl}_2$ ).

**HPLC conditions:** Daicel Chiralpak IE-3 column (85:15 *n*-hexane: 2-propanol, 1.0 mL/min, 27 °C, 254 nm);  $t_r$  (minor) = 4.4 min,  $t_r$  (major) = 7.4 min, 99% ee.

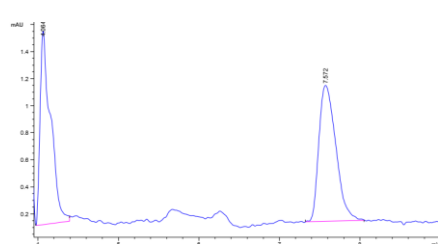

| No. | Time | Area | Area (%) |
|-----|------|------|----------|
| 1   | 4.1  | 13.0 | 46.9012  |
| 2   | 7.6  | 14.8 | 53.0988  |

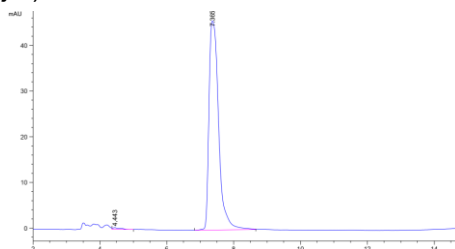

| No. | Time | Area  | Area (%) |
|-----|------|-------|----------|
| 1   | 4.4  | 7.0   | 0.7527   |
| 2   | 7.4  | 918.4 | 99.2473  |

(R)-3-(1,1-difluoro-3-phenylpropyl)-2-(1H-pyrrolo[2,3-b]pyridin-1-yl)isoquinolin-1(2H)-one (**23**)

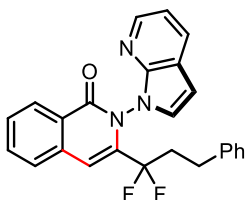

Following the general procedure, the title compound was obtained as off-white liquid in 50% yield (16.6 mg, 0.04 mmol) with >99% ee.  $R_f = 0.5$  (PE/EtOAc = 3/1).

**$^1\text{H NMR}$**  (400 MHz,  $\text{CDCl}_3$ ):  $\delta$  8.35 (d,  $J = 8.0$  Hz, 1H), 8.28 (dd,  $J = 4.8, 1.4$  Hz, 1H), 7.98 (dd,  $J = 7.8, 1.4$  Hz, 1H), 7.80 – 7.76 (m, 1H), 7.69 (d,  $J = 7.8$  Hz, 1H), 7.59 (t,  $J = 7.6$  Hz, 1H), 7.28 (t,  $J = 3.5$  Hz, 1H), 7.19 – 7.12 (m, 4H), 7.06 (s, 1H), 6.91 – 6.89 (m, 2H), 6.70 (d,  $J = 3.9$  Hz, 1H), 2.86 (td,  $J = 12.9, 5.3$  Hz, 1H), 2.67 (dt,  $J = 13.3, 6.6$  Hz, 1H), 2.34 – 2.20 (m, 1H), 2.18 – 1.99 (m, 1H) ppm.

**$^{13}\text{C NMR}$**  (100 MHz,  $\text{CDCl}_3$ ):  $\delta$  161.55, 148.64, 144.52, 139.82, 136.83 (dd,  $J_{\text{C-F}} = 32.7, 24.2$  Hz), 135.02, 133.89, 131.14 (d,  $J_{\text{C-F}} = 2.5$  Hz), 130.03, 128.91, 128.78, 128.47, 128.28, 127.65, 126.27, 126.11, 119.62, 119.46 (t,  $J_{\text{C-F}} = 245.0$  Hz), 118.04, 107.35 (dd,  $J_{\text{C-F}} = 12.3, 5.8$  Hz), 102.32, 38.42 (t,  $J_{\text{C-F}} = 25.5$  Hz), 28.78 (d,  $J_{\text{C-F}} = 4.5$  Hz) ppm.

**$^{19}\text{F NMR}$**  (376 MHz,  $\text{CDCl}_3$ ):  $\delta$  -88.85 (dt,  $J = 258.9, 9.8$  Hz), -96.41 (dt,  $J = 257.8, 22.4$  Hz)

ppm.

**HRMS (ESI) m/z:** [M+H]<sup>+</sup> Calcd for C<sub>25</sub>H<sub>20</sub>F<sub>2</sub>N<sub>3</sub>O: 416.1574; Found: 416.1566.

[α]<sub>D</sub><sup>25</sup> = -265.3 (c = 0.1, CH<sub>2</sub>Cl<sub>2</sub>).

**HPLC conditions:** Daicel Chiralpak ID-3 column (85:15 *n*-hexane: 2-propanol, 1.0 mL/min, 30°C, 254 nm); t<sub>r</sub> (minor) = 22.6 min, t<sub>r</sub> (major) = 24.1 min, >99% ee.

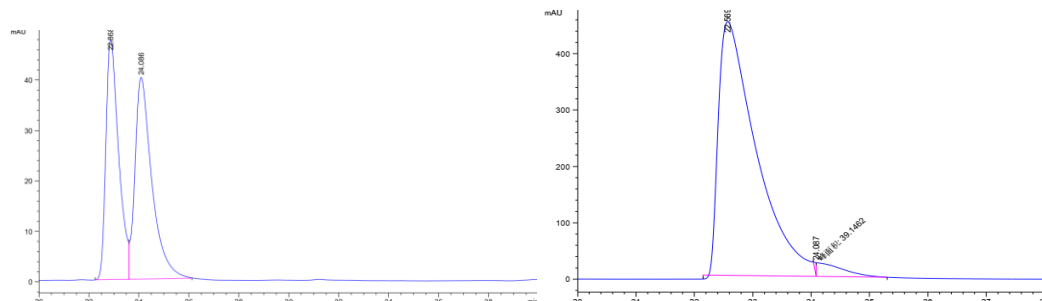

| No. | Time | Area   | Area (%) |
|-----|------|--------|----------|
| 1   | 22.9 | 1689.6 | 47.2289  |
| 2   | 24.1 | 1887.9 | 52.7711  |

| No. | Time | Area     | Area (%) |
|-----|------|----------|----------|
| 1   | 22.6 | 20946.8  | 99.8135  |
| 2   | 24.1 | 39.14625 | 0.1865   |

(*R*)-3,4,6-triphenyl-2-(1H-pyrrolo[2,3-b]pyridin-1-yl)isoquinolin-1(2H)-one (**24**)

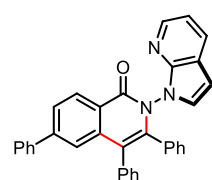

Following the general procedure, the title compound was obtained as white solid in 75% yield (29.3 mg, 0.06 mmol) with 94% ee. R<sub>f</sub> = 0.7 (PE/EtOAc = 2/1). m.p.: 244–246 °C.

**<sup>1</sup>H NMR** (400 MHz, CDCl<sub>3</sub>): δ 8.59 (d, *J* = 8.3 Hz, 1H), 8.36 – 8.32 (m, 1H), 7.78 (td, *J* = 7.9, 1.6 Hz, 2H), 7.54 – 7.47 (m, 3H), 7.45 – 7.35 (m, 3H), 7.27 (d, *J* = 3.0 Hz, 2H), 7.23 – 7.16 (m, 3H), 7.15 – 7.09 (m, 3H), 7.09 – 7.05 (m, 1H), 6.98 (t, *J* = 7.5 Hz, 1H), 6.93 – 6.89 (m, 1H), 6.73 (t, *J* = 7.5 Hz, 1H), 6.37 (d, *J* = 3.8 Hz, 1H) ppm.

**<sup>13</sup>C NMR** (100 MHz, CDCl<sub>3</sub>): δ 161.10, 146.97, 146.08, 144.22, 142.57, 140.23, 138.19, 135.65, 132.41, 131.72, 131.45, 129.95, 129.88, 129.49, 129.40, 129.03, 128.88, 128.43, 128.35, 128.25, 128.11, 127.62, 127.61, 127.59, 127.37, 127.09, 127.07, 126.54, 124.38, 124.34, 119.58, 118.72, 117.25, 100.68 ppm.

**HRMS (ESI) m/z:** [M+H]<sup>+</sup> Calcd for C<sub>34</sub>H<sub>24</sub>N<sub>3</sub>O: 490.1914; Found: 490.1919.

[α]<sub>D</sub><sup>25</sup> = +145.3 (c = 0.1, CH<sub>2</sub>Cl<sub>2</sub>).

**HPLC conditions:** Daicel Chiralpak IB-3 column (80:20 *n*-hexane: 2-propanol, 1.0 mL/min, 30°C, 254 nm); t<sub>r</sub> (minor) = 21.1 min, t<sub>r</sub> (major) = 27.5 min, 94% ee.

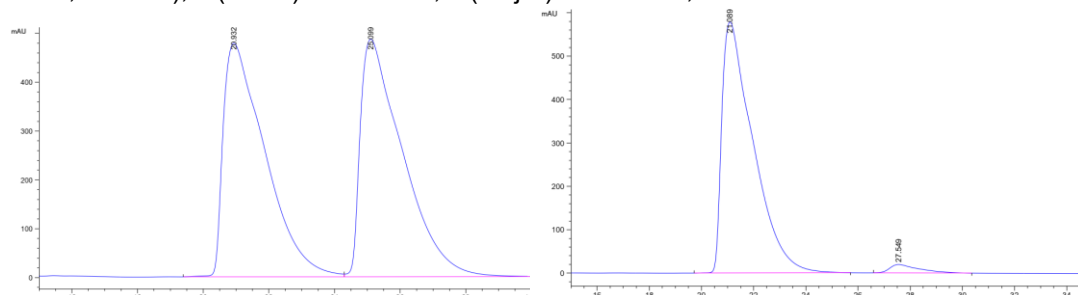

| No. | Time | Area    | Area (%) |
|-----|------|---------|----------|
| 1   | 20.9 | 42343.7 | 49.2317  |
| 2   | 25.1 | 43665.4 | 50.7683  |

| No. | Time | Area     | Area (%) |
|-----|------|----------|----------|
| 1   | 21.1 | 4.8095.9 | 96.9679  |
| 2   | 27.5 | 1503.9   | 3.0321   |

(*R*)-6-fluoro-3,4-diphenyl-2-(1H-pyrrolo[2,3-b]pyridin-1-yl)isoquinolin-1(2H)-one (**25**)



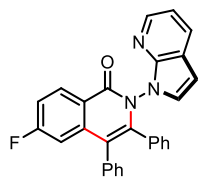

Following the general procedure, the title compound was obtained as white solid in 43% yield (14.8 mg, 0.03 mmol) with 93% ee.  $R_f = 0.7$  (PE/EtOAc = 2/1). m.p.: 185–187 °C.

**$^1\text{H NMR}$**  (400 MHz,  $\text{CDCl}_3$ ):  $\delta$  8.54 (dd,  $J = 8.8, 5.9$  Hz, 1H), 8.33 (dd,  $J = 4.8, 1.4$  Hz, 1H), 7.80 – 7.78 (m, 1H), 7.29 – 7.27 (m, 1H), 7.23 – 7.22 (m, 2H), 7.20 (d,  $J = 3.6$  Hz, 2H), 7.18 – 7.15 (m, 1H), 7.12 – 7.08 (m, 3H), 7.07 (dd,  $J = 4.9, 2.9$  Hz, 1H), 6.97 (t,  $J = 7.2$  Hz, 1H), 6.93 – 6.89 (m, 2H), 6.75 – 6.71 (m, 1H), 6.37 – 6.36 (m, 1H) ppm.

**$^{13}\text{C NMR}$**  (100 MHz,  $\text{CDCl}_3$ ):  $\delta$  165.91 (d,  $J_{\text{C-F}} = 253.5$  Hz), 160.35, 146.76, 144.13, 143.35, 140.30 (d,  $J_{\text{C-F}} = 10.1$  Hz), 135.05, 131.95, 131.91 (d,  $J_{\text{C-F}} = 10.0$  Hz), 131.40, 131.13, 129.63, 129.54, 129.47, 128.61, 128.45, 128.30, 128.14, 127.46, 127.03, 127.02, 121.91 (d,  $J_{\text{C-F}} = 1.9$  Hz), 118.77 (d,  $J_{\text{C-F}} = 3.3$  Hz), 118.58, 117.21,  $\delta$  115.81 (d,  $J_{\text{C-F}} = 23.5$  Hz), 111.48 (d,  $J_{\text{C-F}} = 23.5$  Hz), 100.70 ppm.

**$^{19}\text{F NMR}$**  (376 MHz,  $\text{CDCl}_3$ )  $\delta$  -103.65 – -103.71 (m, 1F) ppm.

**HRMS (ESI)**  $m/z$ :  $[\text{M}+\text{H}]^+$  Calcd for  $\text{C}_{28}\text{H}_{19}\text{FN}_3\text{O}$ : 432.1507; Found: 432.1500.

$[\alpha]_{\text{D}}^{25} = +118.7$  ( $c = 0.1$ ,  $\text{CH}_2\text{Cl}_2$ ).

**HPLC conditions:** Daicel Chiralpak ID-3 column (70:30 *n*-hexane: 2-propanol, 1.0 mL/min, 30°C, 254 nm);  $t_r$  (minor) = 9.8 min,  $t_r$  (major) = 10.7 min, 93% ee.

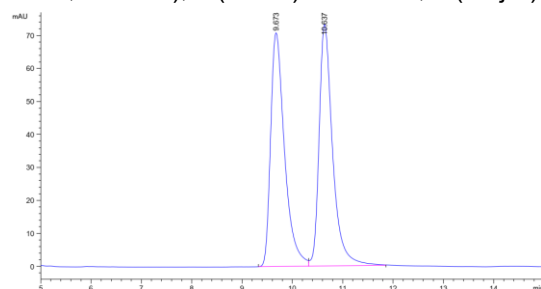

| No. | Time | Area   | Area (%) |
|-----|------|--------|----------|
| 1   | 9.7  | 1361.2 | 49.9391  |
| 2   | 10.6 | 1364.6 | 50.0609  |

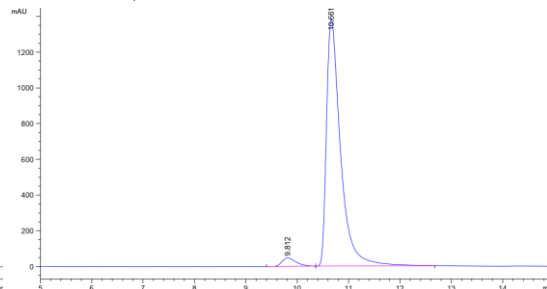

| No. | Time | Area    | Area (%) |
|-----|------|---------|----------|
| 1   | 9.8  | 918.4   | 3.3769   |
| 2   | 10.7 | 26277.0 | 96.6231  |

**(R)-6-chloro-3,4-diphenyl-2-(1H-pyrrolo[2,3-b]pyridin-1-yl)isoquinolin-1(2H)-one (26)**

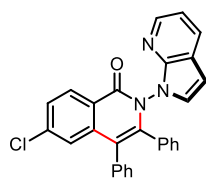

Following the general procedure, the title compound was obtained as white solid in 37% yield (13.3 mg, 0.03 mmol) with 92% ee.  $R_f = 0.7$  (PE/EtOAc = 2/1). m.p.: 172–174 °C.

**$^1\text{H NMR}$**  (400 MHz,  $\text{CDCl}_3$ ):  $\delta$  8.45 (d,  $J = 8.6$  Hz, 1H), 8.33 (d,  $J = 4.8$  Hz, 1H), 7.78 (d,  $J = 7.8$  Hz, 1H), 7.48 (d,  $J = 8.6$  Hz, 1H), 7.30 – 7.25 (m, 2H), 7.22 – 7.20 (m, 3H), 7.17 – 7.15 (m, 1H), 7.10 – 7.06 (m, 4H), 6.96 (t,  $J = 7.5$  Hz, 2H), 6.92 (d,  $J = 7.4$  Hz, 1H), 6.36 (d,  $J = 3.8$  Hz, 1H) ppm.

**$^{13}\text{C NMR}$**  (100 MHz,  $\text{CDCl}_3$ ):  $\delta$  160.59, 146.85, 144.25, 143.60, 140.15, 139.14, 135.00, 132.03, 131.57, 131.30, 130.53, 129.75, 129.68, 129.58, 128.66, 128.58, 128.42, 128.28, 127.90, 127.61, 127.13, 125.56, 123.82, 118.70, 118.60, 117.35, 100.86 ppm.

**HRMS (ESI)**  $m/z$ :  $[\text{M}+\text{H}]^+$  Calcd for  $\text{C}_{28}\text{H}_{19}\text{ClN}_3\text{O}$ : 448.1211; Found: 448.1214.

$[\alpha]_{\text{D}}^{25} = +101.0$  ( $c = 0.1$ ,  $\text{CH}_2\text{Cl}_2$ ).

**HPLC conditions:** Daicel Chiralpak ID-3 column (80:20 *n*-hexane: 2-propanol, 1.0 mL/min, 30°C, 254 nm);  $t_r$  (minor) = 16.6 min,  $t_r$  (major) = 18.2 min, 92% ee.

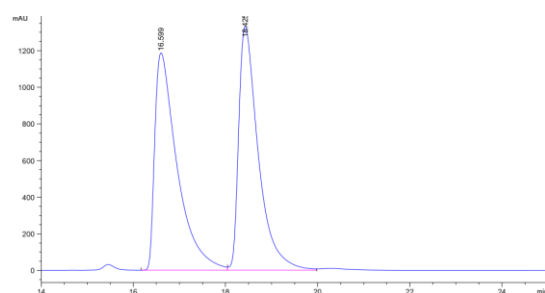

| No. | Time | Area    | Area (%) |
|-----|------|---------|----------|
| 1   | 16.6 | 40048.5 | 50.4644  |
| 2   | 18.4 | 39311.3 | 49.5356  |

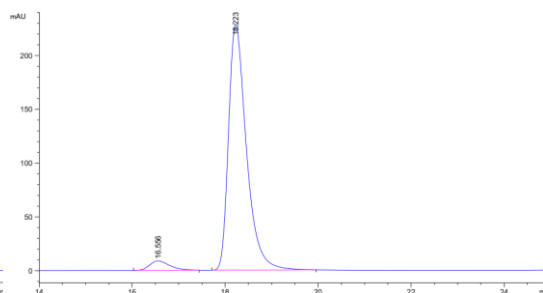

| No. | Time | Area   | Area (%) |
|-----|------|--------|----------|
| 1   | 16.6 | 264.1  | 4.1469   |
| 2   | 18.2 | 6105.6 | 95.8531  |

**(R)-6-methoxy-3,4-diphenyl-2-(1H-pyrrolo[2,3-b]pyridin-1-yl)isoquinolin-1(2H)-one (27)**

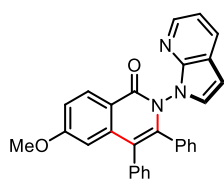

Following the general procedure, the title compound was obtained as white solid in 64% yield (22.7 mg, 0.05 mmol) with 95% ee.  $R_f = 0.7$  (PE/EtOAc = 2/1). m.p.: 203–205 °C.

**$^1\text{H NMR}$**  (400 MHz,  $\text{CDCl}_3$ ):  $\delta$  8.45 (d,  $J = 8.9$  Hz, 1H), 8.33 (dd,  $J = 4.8, 1.2$  Hz, 1H), 7.77 (dd,  $J = 7.8, 1.4$  Hz, 1H), 7.25 – 7.21 (m, 2H), 7.19 – 7.17 (m, 3H), 7.12 – 7.08 (m, 3H), 7.08 – 7.04 (m, 2H), 6.95 (t,  $J = 7.3$  Hz, 1H), 6.89 (t,  $J = 7.5$  Hz, 1H), 6.71 (t,  $J = 7.5$  Hz, 1H), 6.64 (d,  $J = 2.4$  Hz, 1H), 6.35 (d,  $J = 3.8$  Hz, 1H), 3.74 (s, 3H) ppm.

**$^{13}\text{C NMR}$**  (100 MHz,  $\text{CDCl}_3$ ):  $\delta$  163.62, 160.82, 147.01, 144.16, 142.70, 139.95, 135.80, 132.49, 131.65, 131.38, 130.99, 129.88, 129.80, 129.46, 128.99, 128.39, 128.19, 128.06, 127.30, 127.04, 119.18, 119.10, 118.70, 117.17, 115.72, 108.40, 100.56, 55.49 ppm.

**HRMS (ESI)**  $m/z$ :  $[\text{M}+\text{H}]^+$  Calcd for  $\text{C}_{29}\text{H}_{22}\text{N}_3\text{O}_2$ : 444.1707; Found: 444.1707.

$[\alpha]_{\text{D}}^{25} = +148.3$  ( $c = 0.1, \text{CH}_2\text{Cl}_2$ ).

**HPLC conditions:** Daicel Chiralpak IC-3 column (60:40 *n*-hexane: 2-propanol, 1.0 mL/min, 40°C, 254 nm);  $t_r$  (minor) = 21.2 min,  $t_r$  (major) = 72.9 min, 95% ee.

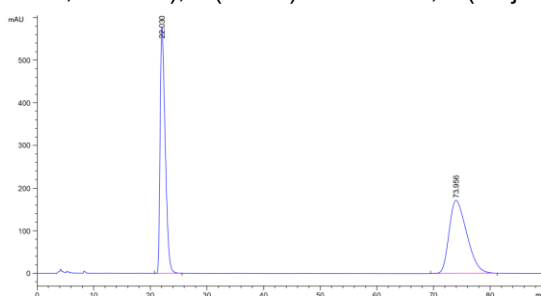

| No. | Time | Area    | Area (%) |
|-----|------|---------|----------|
| 1   | 22.0 | 35995.7 | 49.2656  |
| 2   | 73.9 | 37068.8 | 50.7344  |

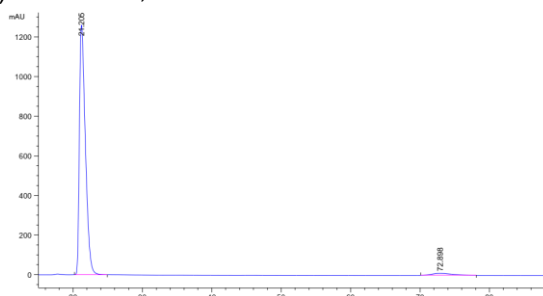

| No. | Time | Area       | Area (%) |
|-----|------|------------|----------|
| 1   | 21.2 | 75401.3    | 97.3222  |
| 2   | 72.9 | 2074.64795 | 2.6778   |

**(R)-1-oxo-3,4-diphenyl-2-(1H-pyrrolo[2,3-b]pyridin-1-yl)-1,2-dihydroisoquinoline-6-carbaldehyde (28)**

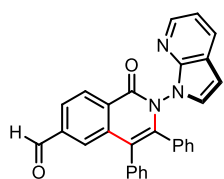

Following the general procedure, the title compound was obtained as pale yellow solid in 69% yield (24.4 mg, 0.06 mmol) with 88% ee.  $R_f = 0.6$  (DCM/EtOAc = 20/1). m.p.: 250–252 °C.

**$^1\text{H NMR}$**  (400 MHz,  $\text{CDCl}_3$ ):  $\delta$  10.03 (s, 1H), 8.66 (d,  $J = 8.2$  Hz, 1H), 8.33 (dd,  $J = 4.8, 1.5$  Hz, 1H), 8.01 (dd,  $J = 8.3, 1.6$  Hz, 1H), 7.81– 7.77 (m, 2H), 7.31 (ddd,  $J = 8.3, 4.9, 3.2$  Hz, 1H), 7.25 – 7.23 (m, 3H), 7.20 – 7.17 (m, 1H), 7.13 –

7.07 (m, 4H), 7.00 – 6.91 (m, 2H), 6.74 (dd,  $J = 8.1, 6.6$  Hz, 1H), 6.38 (d,  $J = 3.8$  Hz, 1H) ppm.

**$^{13}\text{C}$  NMR** (100 MHz,  $\text{CDCl}_3$ ):  $\delta$  192.01, 160.57, 146.78, 144.31, 143.59, 139.38, 138.26, 134.87, 131.86, 131.58, 131.31, 129.89, 129.77, 129.69, 129.49, 129.14, 128.70, 128.54, 128.53, 128.52, 128.39, 128.39, 127.79, 127.21, 125.79, 119.33, 118.74, 117.45, 101.05 ppm.

**HRMS (ESI)**  $m/z$ :  $[\text{M}+\text{H}]^+$  Calcd for  $\text{C}_{29}\text{H}_{20}\text{N}_3\text{O}_2$ : 442.1556; Found: 442.1542.

$[\alpha]_{\text{D}}^{25} = +93.7$  ( $c = 0.1, \text{CH}_2\text{Cl}_2$ ).

**HPLC conditions:** Daicel Chiralpak AS-RH column (8:92 *n*-hexane: 2-propanol, 1.0 mL/min, 30°C, 254 nm);  $t_{\text{r}}$  (minor) = 27.6 min,  $t_{\text{r}}$  (major) = 67.3 min, 88% ee.

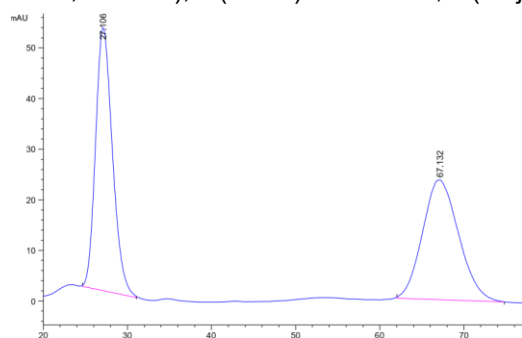

| No. | Time | Area   | Area (%) |
|-----|------|--------|----------|
| 1   | 27.1 | 7252.4 | 50.5791  |
| 2   | 67.1 | 7086.4 | 49.4209  |

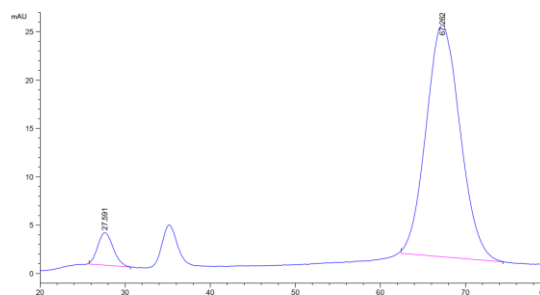

| No. | Time | Area   | Area (%) |
|-----|------|--------|----------|
| 1   | 27.6 | 427.9  | 6.0260   |
| 2   | 67.3 | 6673.3 | 93.9740  |

(*R*)-methyl-1-oxo-3,4-diphenyl-2-(1*H*-pyrrolo[2,3-*b*]pyridin-1-yl)-1,2-dihydroisoquinoline-6-carboxylate (**29**)

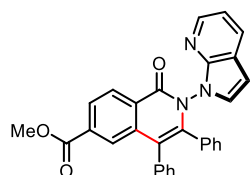

Following the general procedure, the title compound was obtained as white solid in 36% yield (13.2 mg, 0.03 mmol) with 89% ee.  $R_{\text{f}} = 0.5$  (PE/EtOAc = 3/1). m.p.: 245–247 °C.

**$^1\text{H}$  NMR** (400 MHz,  $\text{CDCl}_3$ ):  $\delta$  8.58 (dd,  $J = 8.3, 1.4$  Hz, 1H), 8.33 (dt,  $J = 4.8, 1.7$  Hz, 1H), 8.13 (dt,  $J = 8.3, 1.7$  Hz, 1H), 7.99 (t,  $J = 1.6$  Hz, 1H), 7.79 (dt,  $J = 7.9, 1.6$  Hz, 1H), 7.31 - 7.26 (m, 1H), 7.23 – 7.20 (m, 3H), 7.19 – 7.15 (m, 1H), 7.11 – 7.06 (m, 4H), 6.99 – 6.89 (m, 2H), 6.73 (td,  $J = 7.5, 1.7$  Hz, 1H), 6.37 (dt,  $J = 3.8, 1.6$  Hz, 1H), 3.89 (d,  $J = 1.6$  Hz, 3H) ppm.

**$^{13}\text{C}$  NMR** (100 MHz,  $\text{CDCl}_3$ ):  $\delta$  166.44, 160.66, 146.82, 144.27, 143.11, 137.70, 135.02, 134.36, 132.06, 131.62, 131.36, 129.86, 129.78, 129.62, 129.18, 128.62, 128.57, 128.42, 128.27, 127.89, 127.62, 127.39, 127.16, 127.15, 127.14, 119.53, 118.73, 117.38, 100.92, 52.66 ppm.

**HRMS (ESI)**  $m/z$ :  $[\text{M}+\text{H}]^+$  Calcd for  $\text{C}_{30}\text{H}_{22}\text{N}_3\text{O}_3$ : 472.1661; Found: 472.1644.

$[\alpha]_{\text{D}}^{25} = +90.7$  ( $c = 0.1, \text{CH}_2\text{Cl}_2$ ).

**HPLC conditions:** Daicel Chiralpak IB-3 column (80:20 *n*-hexane: 2-propanol, 1.0 mL/min, 30°C, 254 nm);  $t_{\text{r}}$  (minor) = 17.8 min,  $t_{\text{r}}$  (major) = 26.8 min, 89% ee.

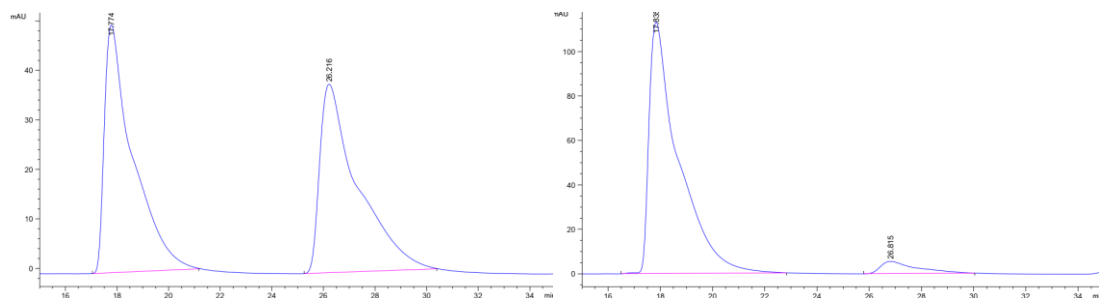

| No. | Time | Area   | Area (%) |
|-----|------|--------|----------|
| 1   | 17.8 | 3824.2 | 49.6726  |
| 2   | 26.2 | 3874.6 | 50.3274  |

| No. | Time | Area   | Area (%) |
|-----|------|--------|----------|
| 1   | 17.8 | 8892.1 | 94.2811  |
| 2   | 26.8 | 539.4  | 5.7189   |

**(R)-3,4-diphenyl-2-(1H-pyrrolo[2,3-b]pyridin-1-yl)-6-(trifluoromethoxy)isoquinolin-1(2H)-one**  
**(30)**

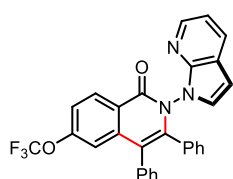

Following the general procedure, the title compound was obtained as white solid in 55% yield (21.9 mg, 0.04 mmol) with 93% ee.  $R_f = 0.7$  (PE/EtOAc = 3/1). m.p.: 77–79 °C.

**$^1\text{H NMR}$**  (400 MHz,  $\text{CDCl}_3$ ):  $\delta$  8.57 (d,  $J = 8.8$  Hz, 1H), 8.33 (d,  $J = 4.7$  Hz, 1H), 7.79 (d,  $J = 7.8$  Hz, 1H), 7.38 – 7.35 (m, 1H), 7.30 – 7.27 (m, 1H), 7.22 (d,  $J = 3.0$  Hz, 2H), 7.20 (d,  $J = 3.7$  Hz, 1H), 7.18 – 7.16 (m, 1H), 7.11 – 7.08 (m, 4H), 7.07 (d,  $J = 4.5$  Hz, 1H), 6.98 (t,  $J = 7.4$  Hz, 1H), 6.92 (t,  $J = 7.4$  Hz, 1H), 6.73 (t,  $J = 7.4$  Hz, 1H), 6.37 (d,  $J = 3.8$  Hz, 1H) ppm.

**$^{13}\text{C NMR}$**  (100 MHz,  $\text{CDCl}_3$ ):  $\delta$  160.36, 153.03 (q,  $J = 1.8$  Hz), 146.84, 144.29, 143.78, 139.80, 134.88, 131.96, 131.50, 131.47, 131.20, 129.72, 129.66, 129.61, 128.63, 128.62, 128.49, 128.32, 127.70, 127.18 (d,  $J = 1.3$  Hz), 123.68, 120.35 (q,  $J = 257.7$  Hz), 119.60 (q,  $J = 1.0$  Hz), 118.86, 118.70, 117.39, 117.15 (q,  $J = 0.9$  Hz), 100.91 ppm.

**$^{19}\text{F NMR}$**  (376 MHz,  $\text{CDCl}_3$ )  $\delta$  -57.31 (s, 3F) ppm.

**HRMS (ESI)**  $m/z$ :  $[\text{M}+\text{H}]^+$  Calcd for  $\text{C}_{28}\text{H}_{19}\text{F}_3\text{N}_3\text{O}$ : 498.1424; Found: 498.1421.

$[\alpha]_{\text{D}}^{25} = +102.7$  ( $c = 0.1$ ,  $\text{CH}_2\text{Cl}_2$ ).

**HPLC conditions:** Daicel Chiralpak IB-3 column (80:20 *n*-hexane: 2-propanol, 1.0 mL/min, 30°C, 254 nm);  $t_r$  (minor) = 12.3 min,  $t_r$  (major) = 16.3 min, 93% ee.

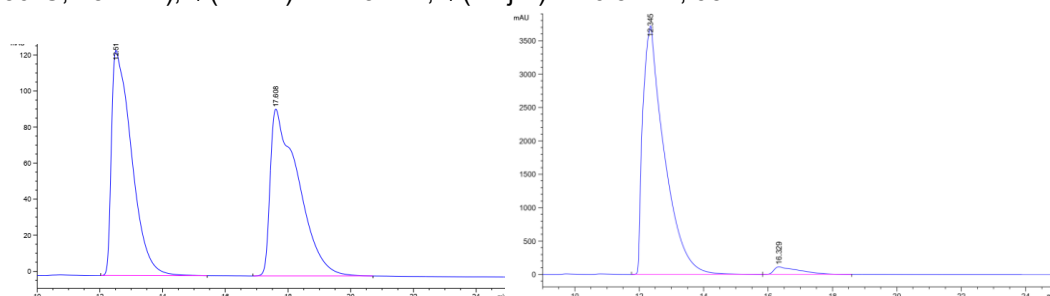

| No. | Time | Area   | Area (%) |
|-----|------|--------|----------|
| 1   | 12.5 | 5561.8 | 49.2018  |
| 2   | 17.6 | 5742.3 | 50.7982  |

| No. | Time | Area   | Area (%) |
|-----|------|--------|----------|
| 1   | 12.3 | 172353 | 96.5868  |
| 2   | 16.3 | 6090.7 | 3.4132   |

**(R)-1-oxo-3,4-diphenyl-2-(1H-pyrrolo[2,3-b]pyridin-1-yl)-1,2-dihydroisoquinoline-6-carbonitrile**  
**(31)**

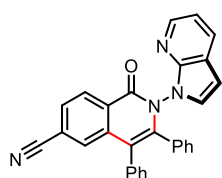

Following the general procedure, the title compound was obtained as pale yellow solid in 40% yield (14.0 mg, 0.03 mmol) with 84% ee.  $R_f = 0.6$  (PE/EtOAc = 2/1). m.p.: 253–255 °C.

**<sup>1</sup>H NMR** (400 MHz, CDCl<sub>3</sub>): δ 8.61 (d, *J* = 8.2 Hz, 1H), 8.33 (d, *J* = 4.5 Hz, 1H), 7.80 (d, *J* = 7.7 Hz, 1H), 7.72 (d, *J* = 7.7 Hz, 1H), 7.61 (s, 1H), 7.32 – 7.28 (m, 1H), 7.25 – 7.22 (m, 2H), 7.20 – 7.14 (m, 2H), 7.10 – 7.06 (m, 4H), 6.99 (t, *J* = 7.4 Hz, 1H), 6.93 (t, *J* = 7.4 Hz, 1H), 6.74 (t, *J* = 7.5 Hz, 1H), 6.38 (d, *J* = 3.8 Hz, 1H) ppm.

**<sup>13</sup>C NMR** (100 MHz, CDCl<sub>3</sub>): δ 160.13, 146.73, 144.42, 144.34, 138.09, 134.30, 131.58, 131.45, 131.17, 130.89, 129.86, 129.73, 129.63, 129.56, 129.08, 128.85, 128.69, 128.55, 128.37, 128.00, 127.91, 127.27, 127.26, 118.73, 118.51, 118.20, 117.53, 116.86, 101.18 ppm.

**HRMS (ESI)** *m/z*: [M+H]<sup>+</sup> Calcd for C<sub>29</sub>H<sub>19</sub>N<sub>4</sub>O: 439.1553; Found: 439.1542

[α]<sub>D</sub><sup>25</sup> = +104.0 (c = 0.1, CH<sub>2</sub>Cl<sub>2</sub>).

**HPLC conditions:** Daicel Chiralpak ID-3 column (70:30 *n*-hexane: 2-propanol, 1.0 mL/min, 30°C, 254 nm); *t<sub>r</sub>* (minor) = 14.3 min, *t<sub>r</sub>* (major) = 19.2 min, 84% ee.

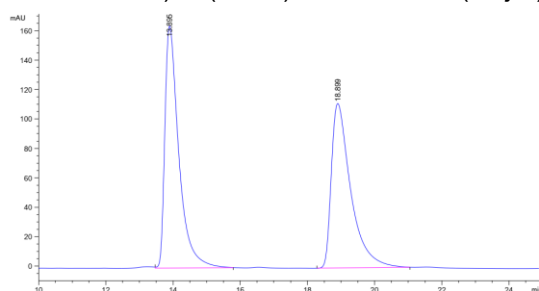

| No. | Time | Area   | Area (%) |
|-----|------|--------|----------|
| 1   | 13.9 | 4751.7 | 51.4586  |
| 2   | 18.9 | 4482.4 | 48.5414  |

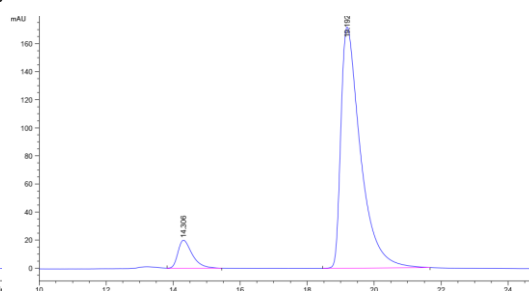

| No. | Time | Area   | Area (%) |
|-----|------|--------|----------|
| 1   | 14.3 | 604.8  | 7.9578   |
| 2   | 19.2 | 6995.4 | 92.0422  |

**(*R*)-7-methyl-3,4-diphenyl-2-(1H-pyrrolo[2,3-*b*]pyridin-1-yl)isoquinolin-1(2H)-one (32)**

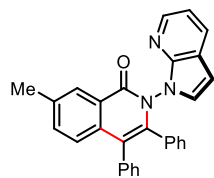

Following the general procedure, the title compound was obtained as white solid in 41% yield (14.0 mg, 0.03 mmol) with 92% ee. *R<sub>f</sub>* = 0.5 (DCM/EtOAc = 50/1). m.p.: 177–179 °C.

**<sup>1</sup>H NMR** (400 MHz, CDCl<sub>3</sub>): δ 8.33 – 8.32 (m, 2H), 7.78 (dd, *J* = 7.8, 1.5 Hz, 1H), 7.44 (dd, *J* = 8.3, 1.9 Hz, 1H), 7.28 – 7.22 (m, 2H), 7.21 – 7.16 (m, 4H), 7.11 – 7.04 (m, 4H), 6.95 (t, *J* = 7.4 Hz, 1H), 6.92 – 6.87 (m, 1H), 6.73 – 6.69 (m, 1H), 6.35 (d, *J* = 3.8 Hz, 1H), 2.49 (s, 3H) ppm.

**<sup>13</sup>C NMR** (100 MHz, CDCl<sub>3</sub>): δ 161.18, 146.92, 144.16, 141.12, 137.57, 135.91, 135.43, 134.72, 132.44, 131.67, 131.42, 130.05, 129.95, 129.47, 128.88, 128.35, 128.31, 128.15, 127.98, 127.20, 127.03, 126.12, 125.36, 119.39, 118.69, 117.18, 100.58, 21.47 ppm.

**HRMS (ESI)** *m/z*: [M+H]<sup>+</sup> Calcd for C<sub>29</sub>H<sub>22</sub>N<sub>3</sub>O: 428.1757; Found: 428.1755.

[α]<sub>D</sub><sup>25</sup> = +51.7 (c = 0.1, CH<sub>2</sub>Cl<sub>2</sub>).

**HPLC conditions:** Daicel Chiralpak IB-3 column (80:20 *n*-hexane: 2-propanol, 1.0 mL/min, 30°C, 254 nm); *t<sub>r</sub>* (minor) = 15.6 min, *t<sub>r</sub>* (major) = 20.5 min, 92% ee.

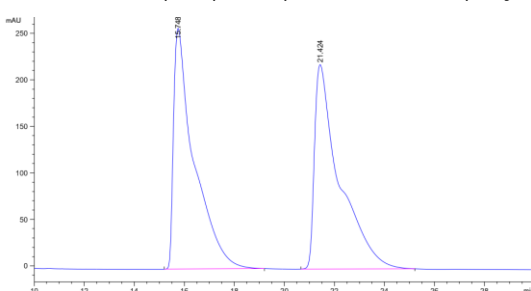

| No. | Time | Area    | Area (%) |
|-----|------|---------|----------|
| 1   | 15.7 | 14714.0 | 49.2441  |

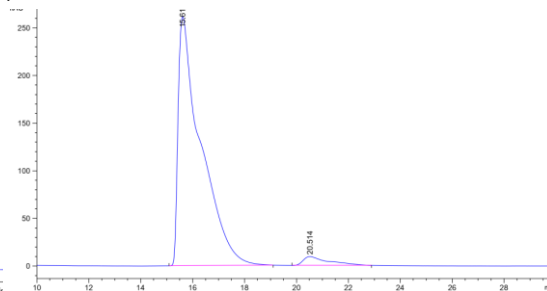

| No. | Time | Area    | Area (%) |
|-----|------|---------|----------|
| 1   | 15.6 | 15966.9 | 96.1342  |

|   |      |         |         |
|---|------|---------|---------|
| 2 | 21.4 | 15165.7 | 50.7559 |
|---|------|---------|---------|

|   |      |        |        |
|---|------|--------|--------|
| 2 | 20.5 | 642.07 | 3.8658 |
|---|------|--------|--------|

(*R*)-8-methyl-3,4-diphenyl-2-(1H-pyrrolo[2,3-b]pyridin-1-yl)isoquinolin-1(2H)-one (**33**)

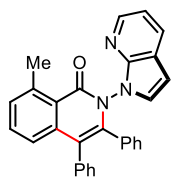

Following the general procedure, the title compound was obtained as white solid in 39% yield (13.4 mg, 0.03 mmol) with 91% ee. *R<sub>f</sub>* = 0.7 (PE/EtOAc = 3/1). m.p.: 96–98 °C.

**<sup>1</sup>H NMR** (400 MHz, CDCl<sub>3</sub>): δ 8.34 (dd, *J* = 4.8, 1.5 Hz, 1H), 7.77 (dd, *J* = 7.8, 1.5 Hz, 1H), 7.47 – 7.42 (m, 1H), 7.29 (d, *J* = 7.3 Hz, 1H), 7.25 – 7.20 (m, 2H), 7.19 – 7.14 (m, 3H), 7.13 – 7.10 (m, 3H), 7.06 (dd, *J* = 7.8, 4.8 Hz, 2H), 6.95 (t, *J* = 7.9 Hz, 1H), 6.88 (tt, *J* = 7.4, 1.3 Hz, 1H), 6.71 (td, *J* = 7.7, 1.3 Hz, 1H), 6.37 (d, *J* = 3.8 Hz, 1H), 2.91 (s, 3H) ppm.

**<sup>13</sup>C NMR** (100 MHz, CDCl<sub>3</sub>): δ 161.69, 146.84, 144.17, 143.02, 142.02, 139.50, 136.44, 132.56, 132.46, 131.76, 131.54, 130.59, 129.79, 129.49, 129.03, 128.34, 128.10, 128.04, 127.17, 127.00, 124.56, 123.86, 119.32, 118.70, 117.19, 100.55, 24.22 ppm.

**HRMS (ESI)** *m/z*: [M+H]<sup>+</sup> Calcd for C<sub>29</sub>H<sub>22</sub>N<sub>3</sub>O: 428.1757; Found: 428.1754.

[α]<sub>D</sub><sup>25</sup> = +55.3 (c = 0.1, CH<sub>2</sub>Cl<sub>2</sub>).

**HPLC conditions:** Daicel Chiralpak ID-3 column (90:10 *n*-hexane: 2-propanol, 1.0 mL/min, 30°C, 254 nm); *t<sub>r</sub>* (minor) = 12.6 min, *t<sub>r</sub>* (major) = 15.0 min, 92% ee.

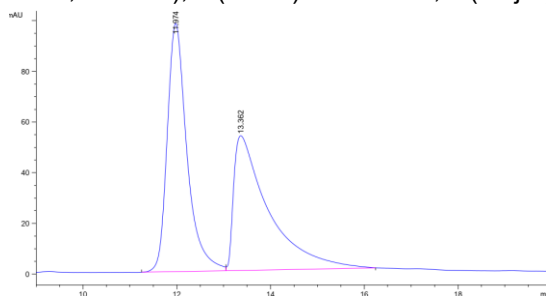

| No. | Time | Area   | Area (%) |
|-----|------|--------|----------|
| 1   | 11.9 | 2870.2 | 50.9180  |
| 2   | 13.4 | 2766.7 | 49.0820  |

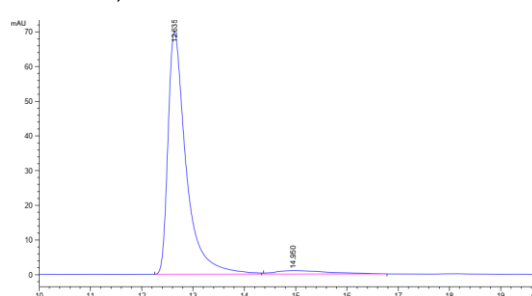

| No. | Time | Area   | Area (%) |
|-----|------|--------|----------|
| 1   | 12.6 | 1721.2 | 95.7319  |
| 2   | 15.0 | 76.7   | 4.2681   |

(*R*)-2-(3-chloro-1H-pyrrolo[2,3-b]pyridin-1-yl)-3,4-diphenylisoquinolin-1(2H)-one (**34**)

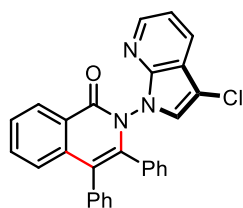

**<sup>1</sup>H NMR** (400 MHz, CDCl<sub>3</sub>): δ 8.51 (dd, *J* = 7.6, 0.7 Hz, 1H), 8.37 (dd, *J* = 4.8, 1.5 Hz, 1H), 7.82 (dd, *J* = 7.9, 1.3 Hz, 1H), 7.65 – 7.62 (m, 1H), 7.56 – 7.53 (m, 1H), 7.28 (d, *J* = 8.4 Hz, 1H), 7.26 (d, *J* = 4.7 Hz, 1H), 7.22 – 7.17 (m, 4H), 7.15 (dd, *J* = 7.9, 4.8 Hz, 1H), 7.12 (d, *J* = 7.8 Hz, 1H), 7.10 – 7.08 (m, 2H), 7.01 (t, *J* = 7.5 Hz, 1H), 6.94 (t, *J* = 7.5 Hz, 1H), 6.75 (t, *J* = 7.6 Hz, 1H) ppm.

**<sup>13</sup>C NMR** (100 MHz, CDCl<sub>3</sub>): δ 160.96, 145.97, 145.27, 141.75, 137.62, 135.46, 133.38, 132.01, 131.50, 131.30, 129.78, 129.75, 128.64, 128.36, 128.27, 128.00, 127.40, 127.29, 127.27, 127.22, 127.09, 126.13, 125.47, 125.21, 119.56, 117.65, 117.17, 105.18 ppm.

**HRMS (ESI)** *m/z*: [M+H]<sup>+</sup> Calcd for C<sub>28</sub>H<sub>19</sub>ClN<sub>3</sub>O: 448.1211; Found: 448.1215.

[α]<sub>D</sub><sup>25</sup> = +82.0 (c = 0.1, CH<sub>2</sub>Cl<sub>2</sub>).

**HPLC conditions:** Daicel Chiralpak AS-RH column (85:15 *n*-hexane: 2-propanol, 1.0 mL/min, 25 °C, 254 nm); *t<sub>r</sub>* (minor) = 4.1 min, *t<sub>r</sub>* (major) = 24.4 min, 95% ee.

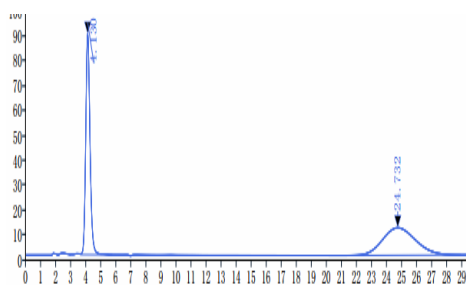

| No. | Time | Area   | Area (%) |
|-----|------|--------|----------|
| 1   | 4.1  | 9634.9 | 51.0009  |
| 2   | 24.7 | 9256.8 | 49.9991  |

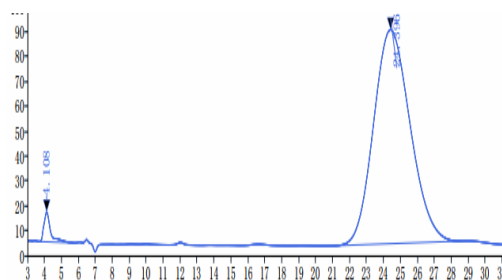

| No. | Time | Area   | Area (%) |
|-----|------|--------|----------|
| 1   | 4.1  | 217.2  | 2.4461   |
| 2   | 24.4 | 8660.4 | 97.5539  |

**(R)-2-(3-bromo-1H-pyrrolo[2,3-b]pyridin-1-yl)-3,4-diphenylisoquinolin-1(2H)-one (35)**

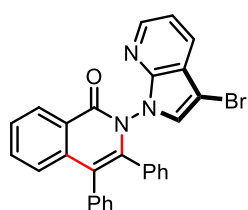

**<sup>1</sup>H NMR** (400 MHz, CDCl<sub>3</sub>): δ 8.51 (dd, *J* = 8.0, 1.1 Hz, 1H), 8.36 (dd, *J* = 4.8, 1.4 Hz, 1H), 7.75 (dd, *J* = 7.9, 1.5 Hz, 1H), 7.63 (ddd, *J* = 8.4, 7.3, 1.4 Hz, 1H), 7.56 – 7.53 (m, 1H), 7.28 (d, *J* = 8.2 Hz, 1H), 7.25 (d, *J* = 2.0 Hz, 1H), 7.22 – 7.17 (m, 4H), 7.16 – 7.14 (m, 2H), 7.11 (d, *J* = 7.8 Hz, 1H), 7.08 (d, *J* = 7.7 Hz, 1H), 7.00 (t, *J* = 7.3 Hz, 1H), 6.95 – 6.92 (m, 1H), 6.74 (t, *J* = 7.4 Hz, 1H) ppm.

**<sup>13</sup>C NMR** (100 MHz, CDCl<sub>3</sub>): δ 160.92, 146.28, 145.23, 141.72, 137.62, 135.46, 133.39, 131.97, 131.50, 131.30, 129.78, 129.75, 128.65, 128.36, 128.27, 128.17, 128.01, 127.84, 127.40, 127.27, 127.21, 127.08, 126.14, 125.21, 119.56, 118.63, 117.79, 90.06 ppm.

**HRMS (ESI)** *m/z*: [M+H]<sup>+</sup> Calcd for C<sub>28</sub>H<sub>19</sub>BrN<sub>3</sub>O: 492.0706; Found: 492.0715.

[α]<sub>D</sub><sup>25</sup> = +86.0 (c = 0.1, CH<sub>2</sub>Cl<sub>2</sub>).

**HPLC conditions:** Daicel Chiralpak IB-3 column (96:4 *n*-hexane: 2-propanol, 1.0 mL/min, 27 °C, 254 nm); *t<sub>r</sub>* (minor) = 22.7 min, *t<sub>r</sub>* (major) = 25.4 min, >99% ee.

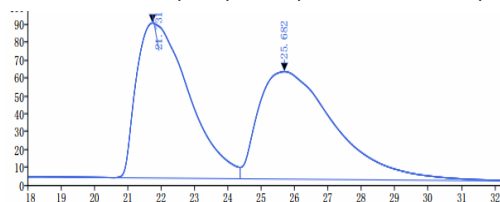

| No. | Time | Area   | Area (%) |
|-----|------|--------|----------|
| 1   | 21.7 | 7363.2 | 49.5453  |
| 2   | 25.7 | 7498.4 | 50.4547  |

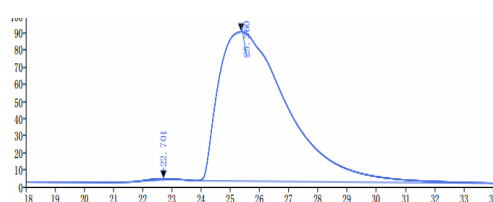

| No. | Time | Area    | Area (%) |
|-----|------|---------|----------|
| 1   | 22.7 | 36.2    | 0.2652   |
| 2   | 25.4 | 13611.9 | 99.7348  |

## 8. Copies of NMR spectra

### $^1\text{H}$ NMR of **3** (400 MHz, $\text{CDCl}_3$ )

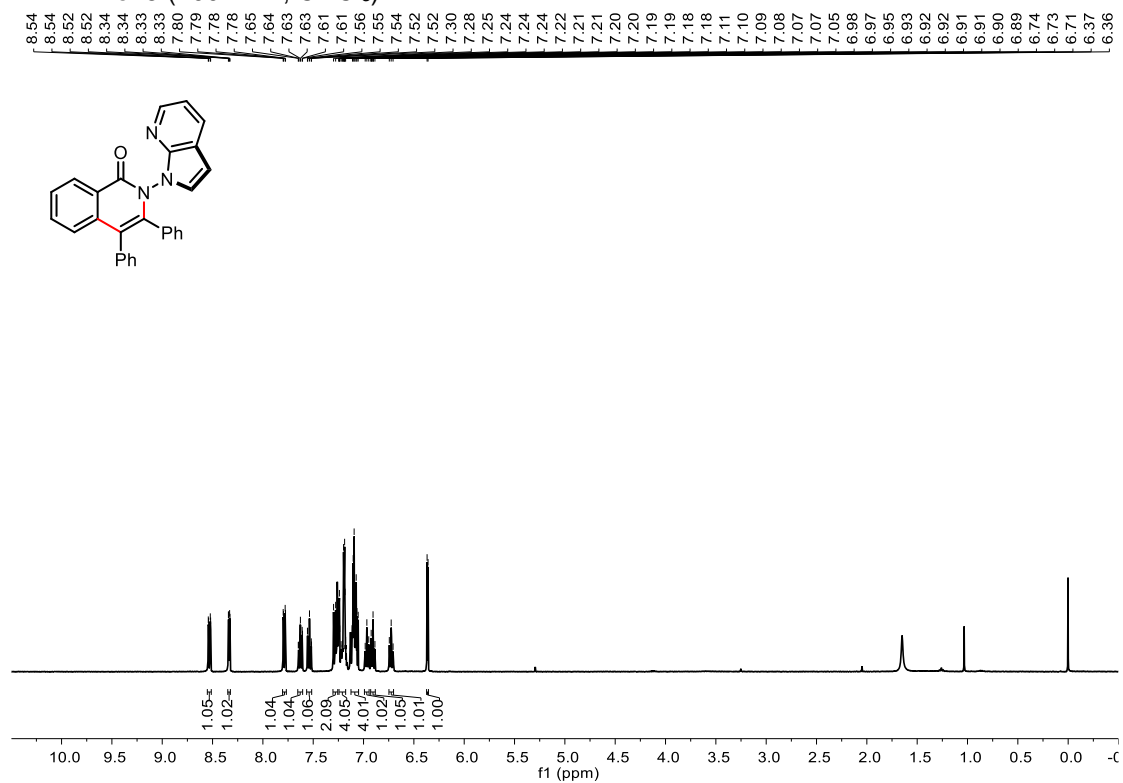

### $^{13}\text{C}$ NMR of **3** (100 MHz, $\text{CDCl}_3$ )

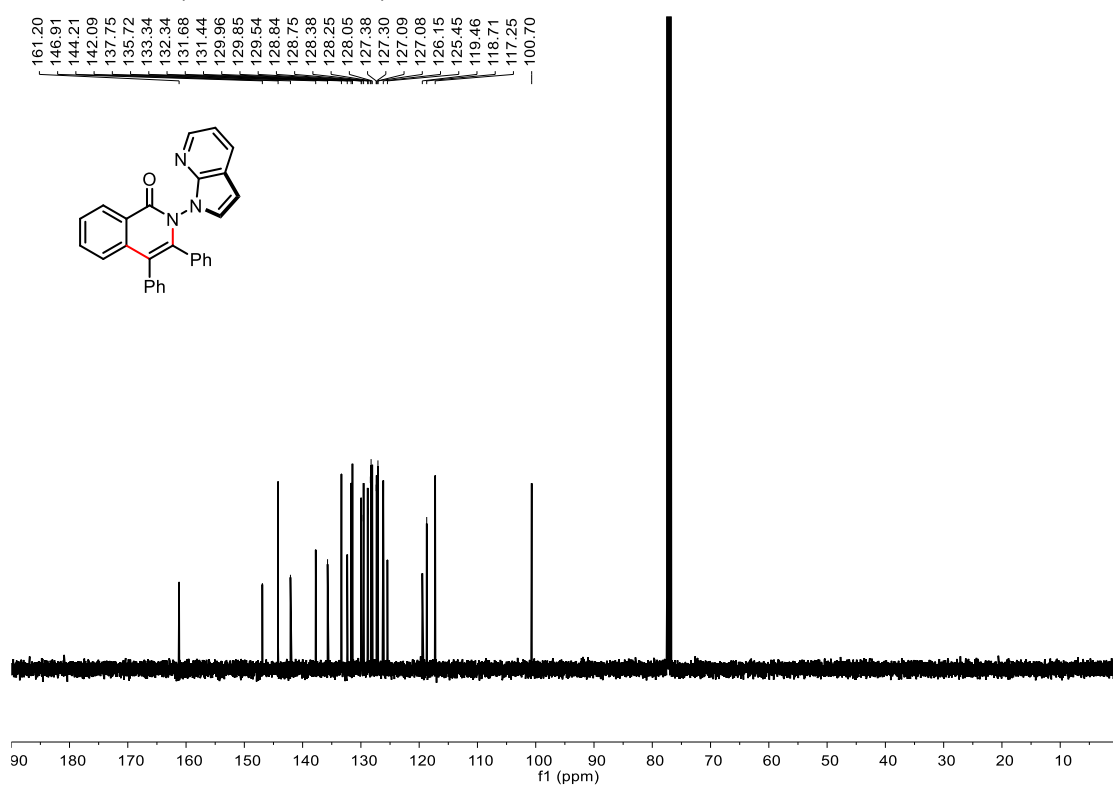



<sup>1</sup>H NMR of **4** (400 MHz, CDCl<sub>3</sub>)

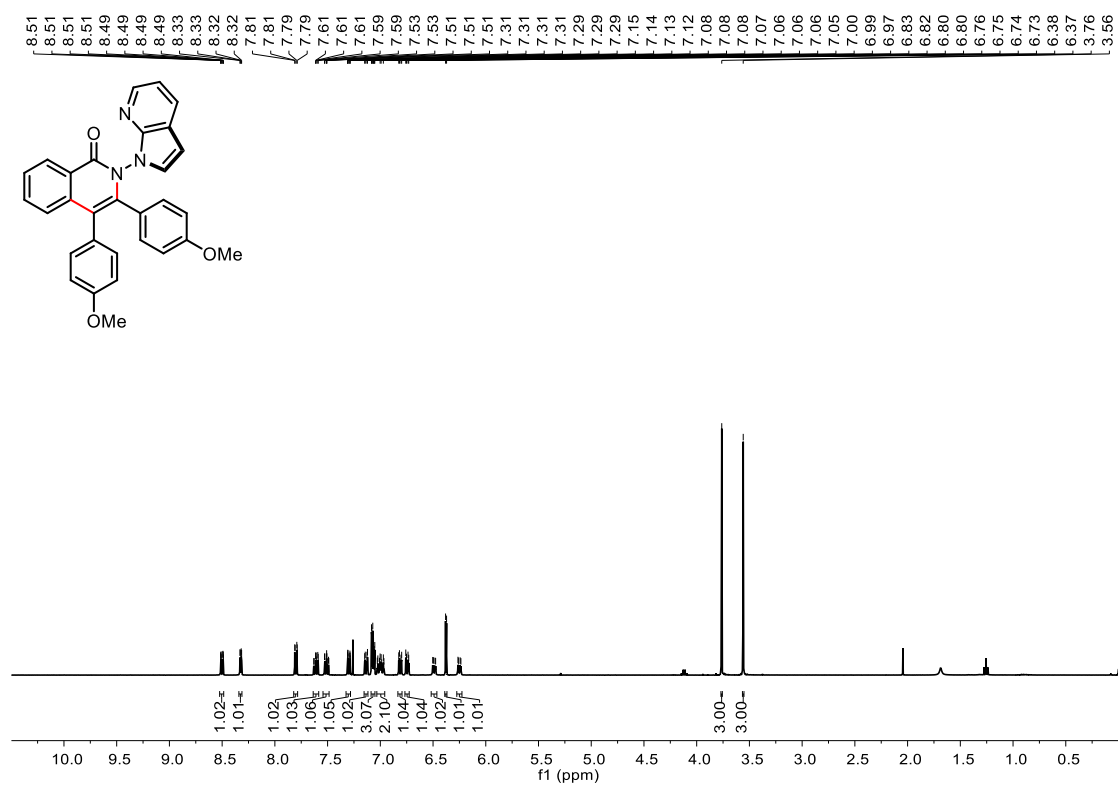

<sup>13</sup>C NMR of **4** (100 MHz, CDCl<sub>3</sub>)

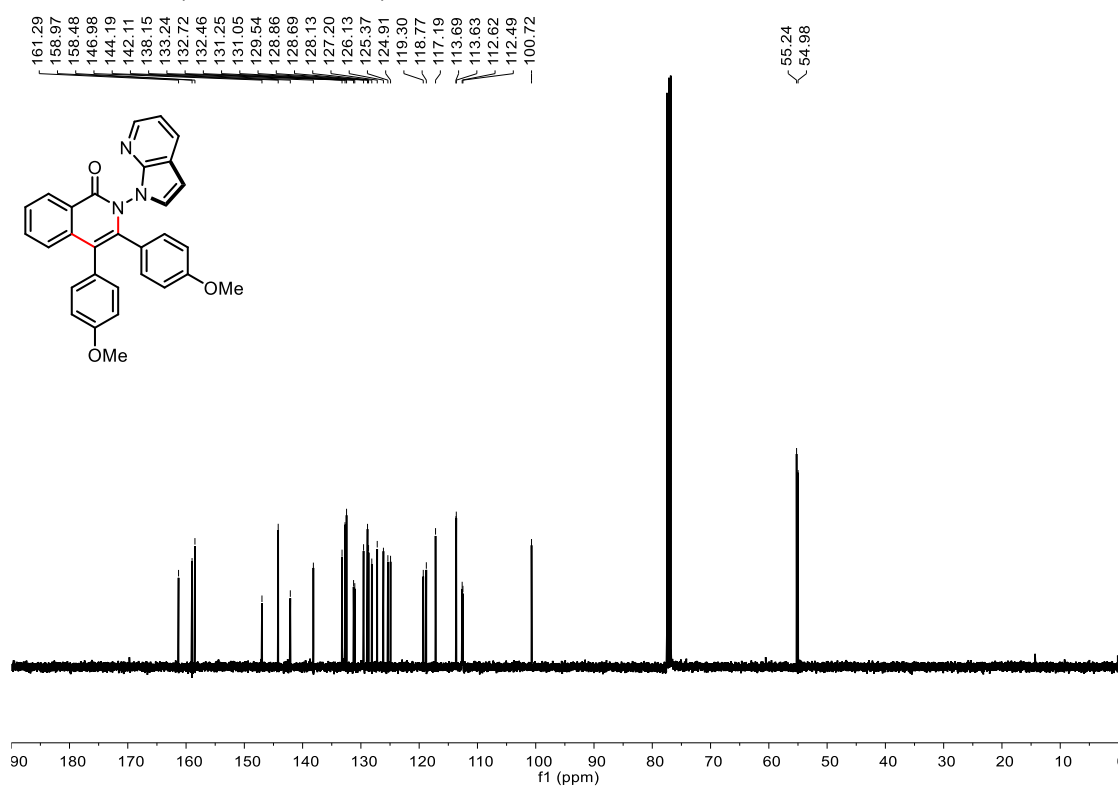

<sup>1</sup>H NMR of **5** (400 MHz, CDCl<sub>3</sub>)

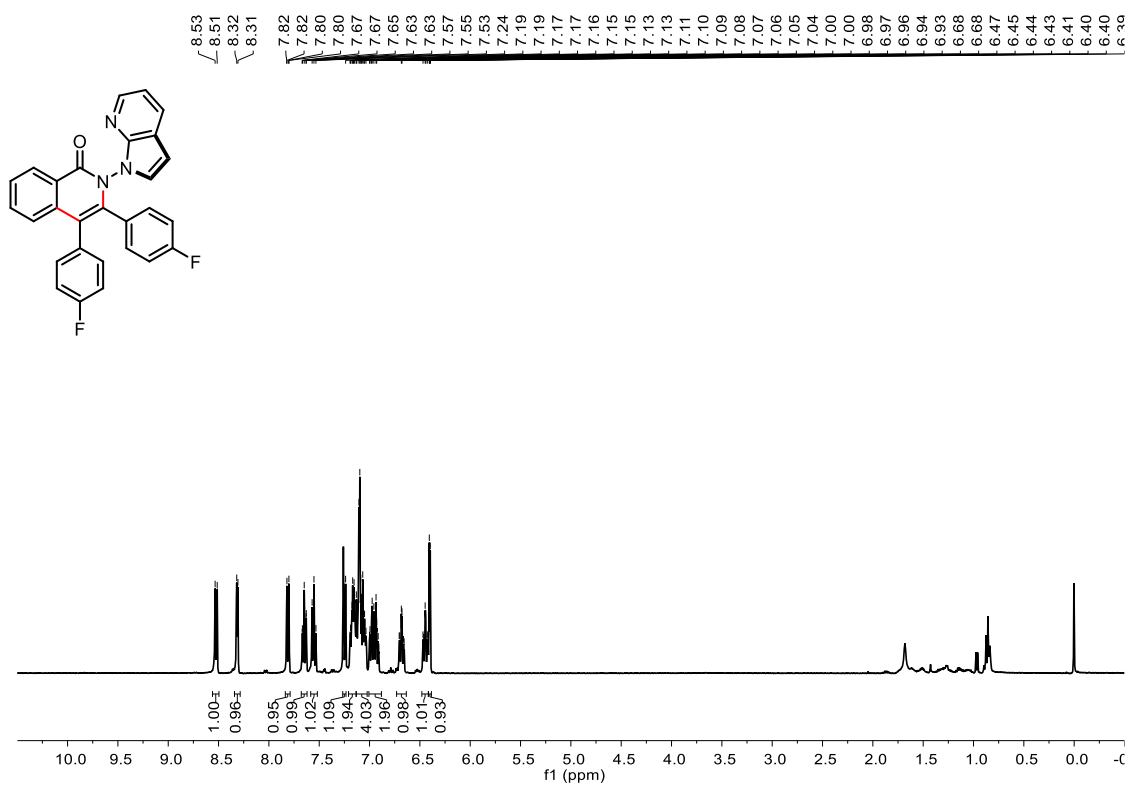

<sup>13</sup>C NMR of **5** (100 MHz, CDCl<sub>3</sub>)

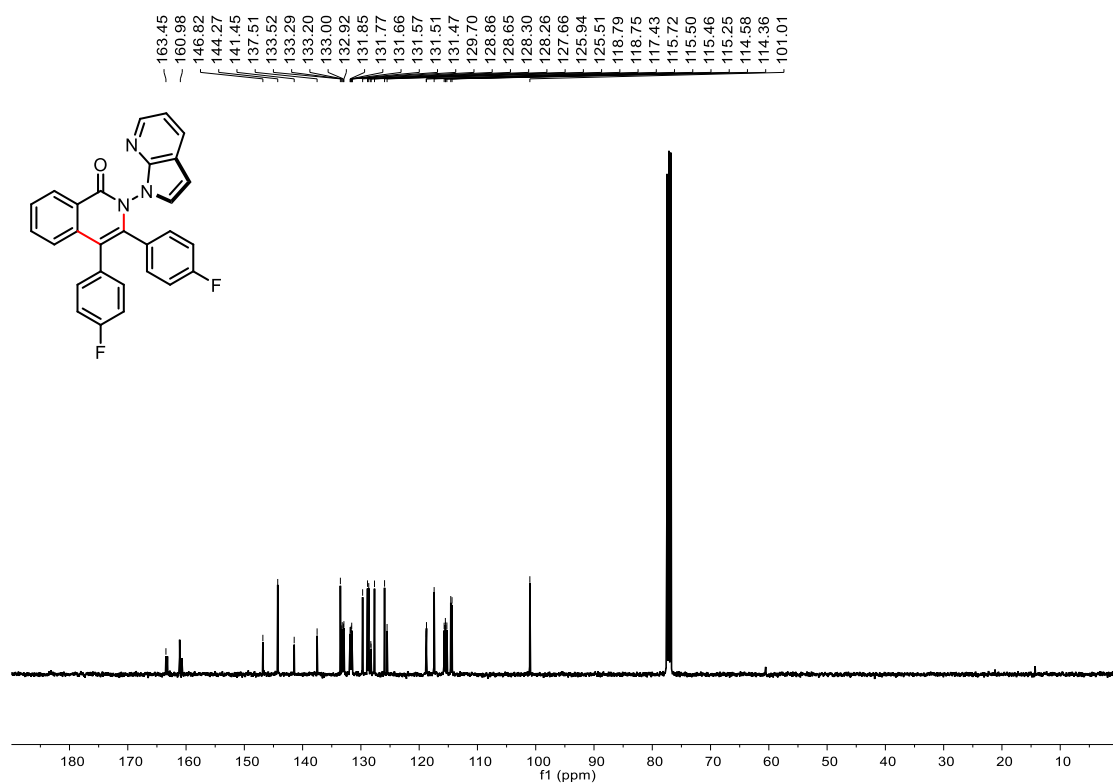

$^{19}\text{F}$  NMR of **5** (376 MHz,  $\text{CDCl}_3$ )

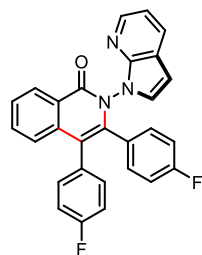

-111.68  
-111.70  
-111.72  
-111.73

-114.00  
-114.02  
-114.04  
-114.05

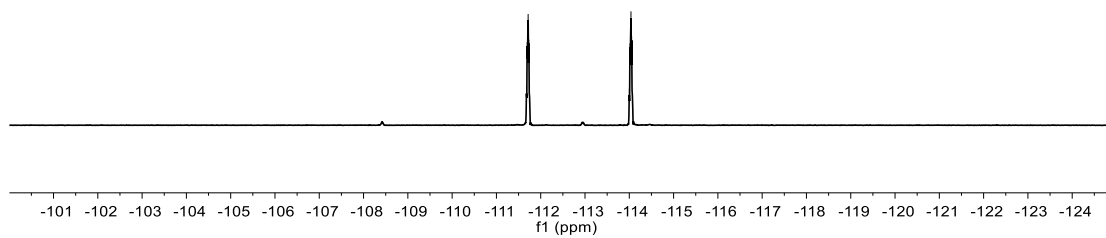

<sup>1</sup>H NMR of **6** (400 MHz, CDCl<sub>3</sub>)

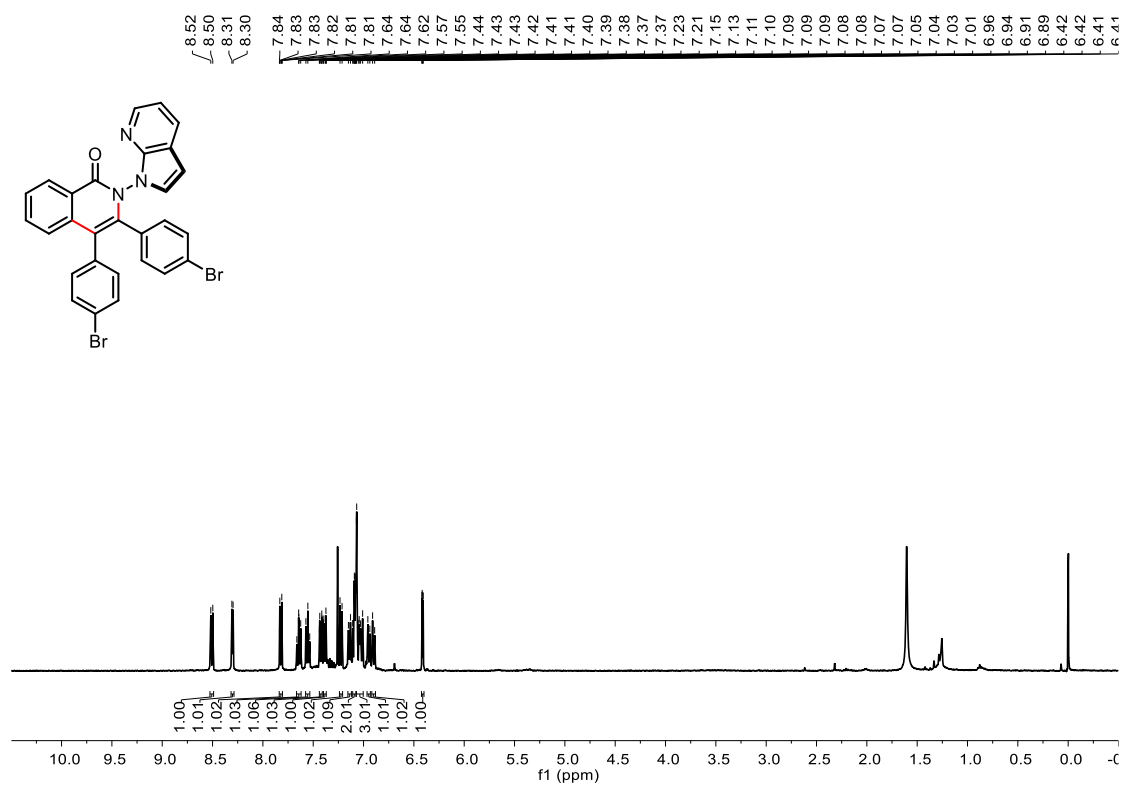

<sup>13</sup>C NMR of **6** (100 MHz, CDCl<sub>3</sub>)

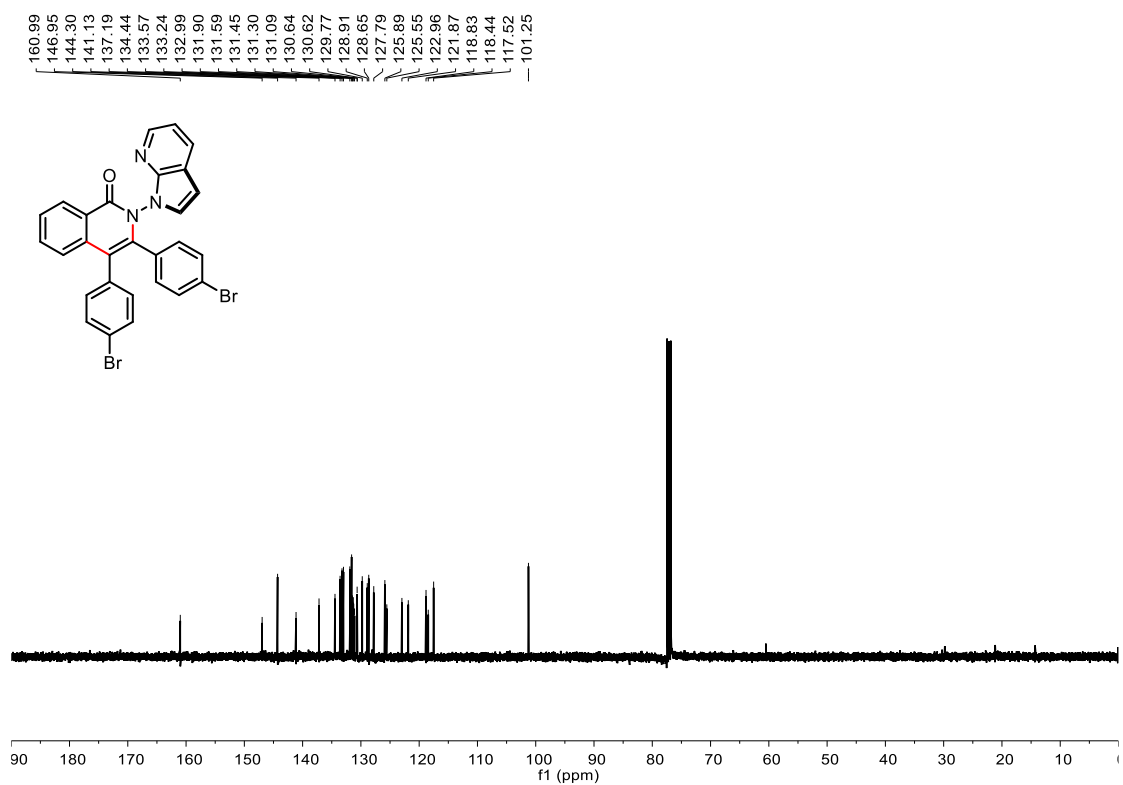

<sup>1</sup>H NMR of 7 (400 MHz, CDCl<sub>3</sub>)

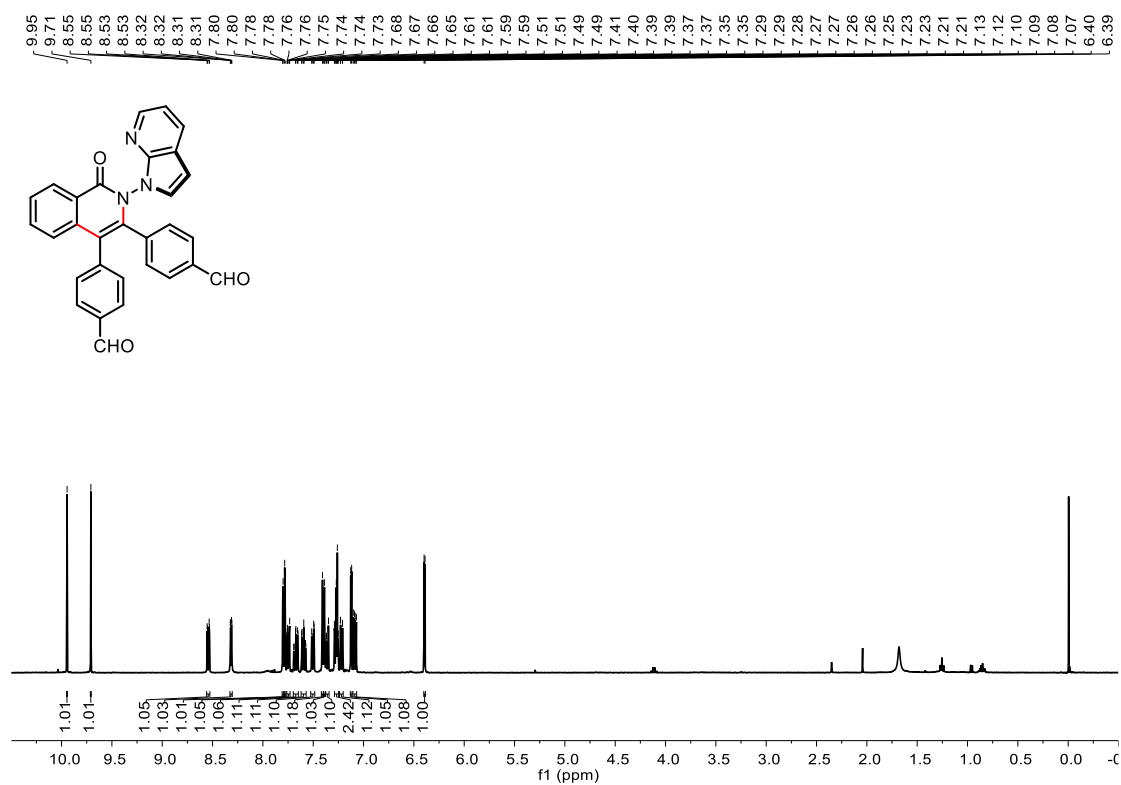

<sup>13</sup>C NMR of 7 (100 MHz, CDCl<sub>3</sub>)

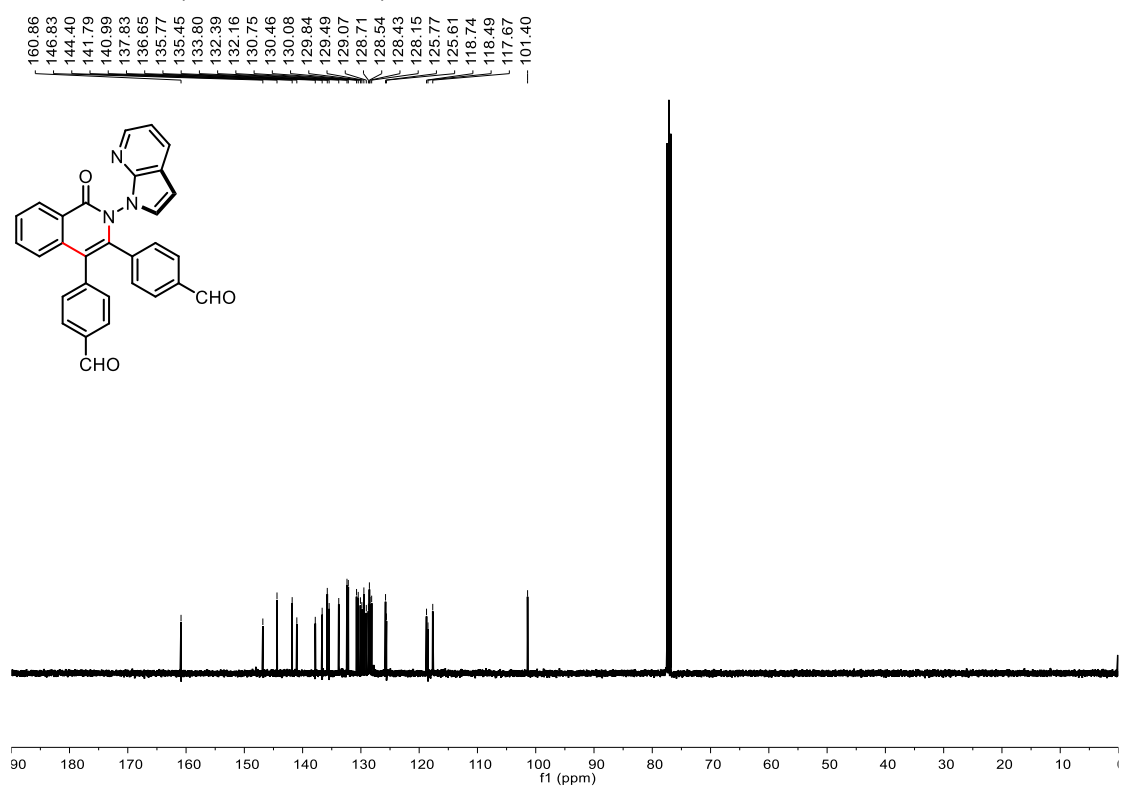

<sup>1</sup>H NMR of **8** (400 MHz, CDCl<sub>3</sub>)

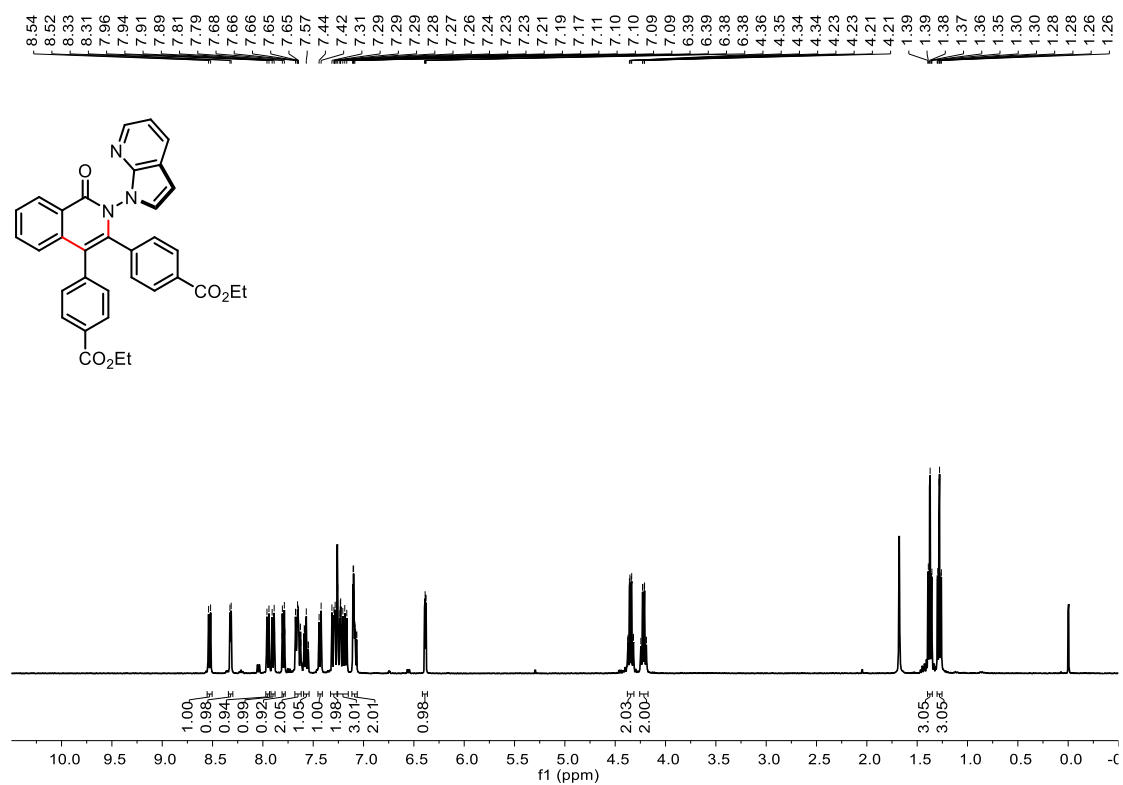

<sup>13</sup>C NMR of **8** (100 MHz, CDCl<sub>3</sub>)

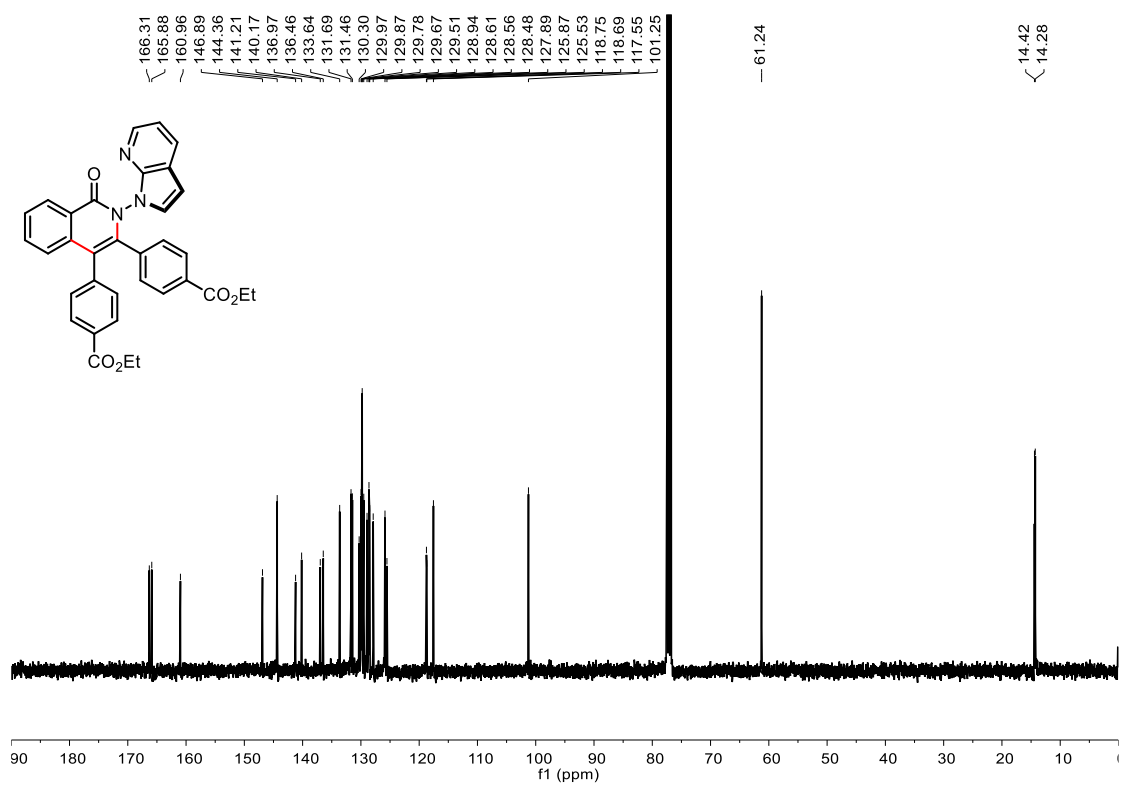

<sup>1</sup>H NMR of **9** (400 MHz, CDCl<sub>3</sub>)

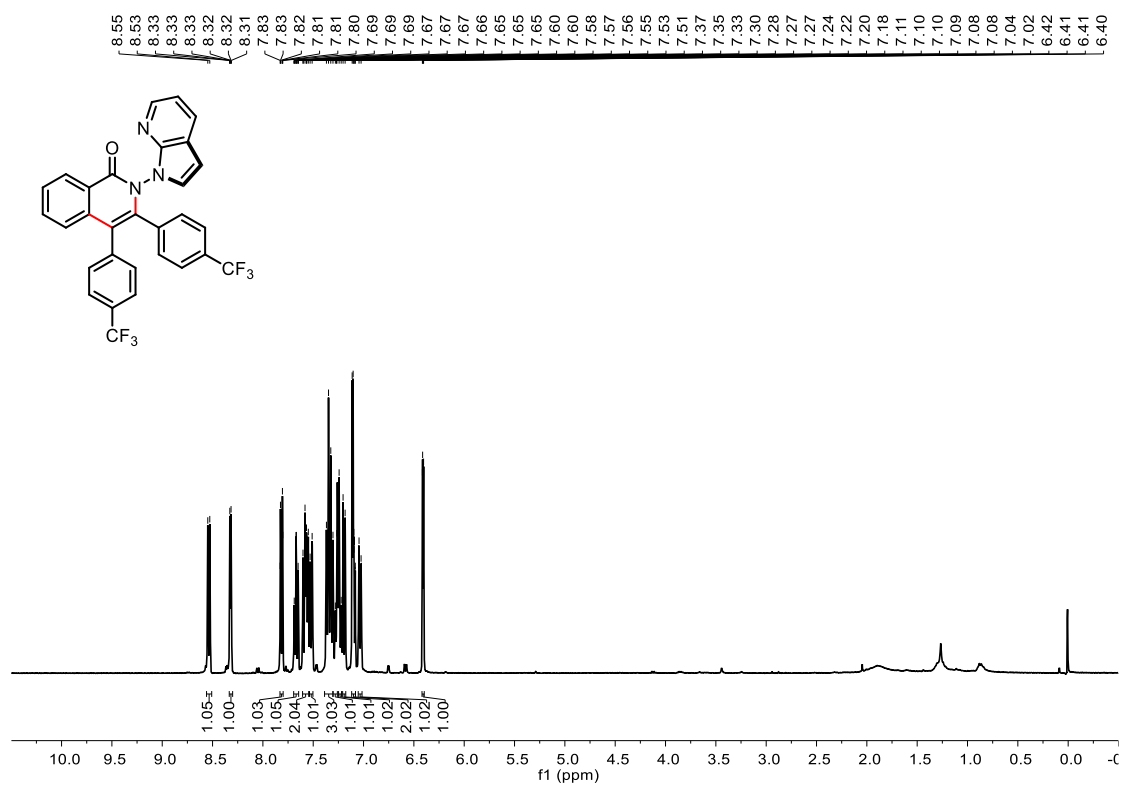

<sup>13</sup>C NMR of **9** (100 MHz, CDCl<sub>3</sub>)

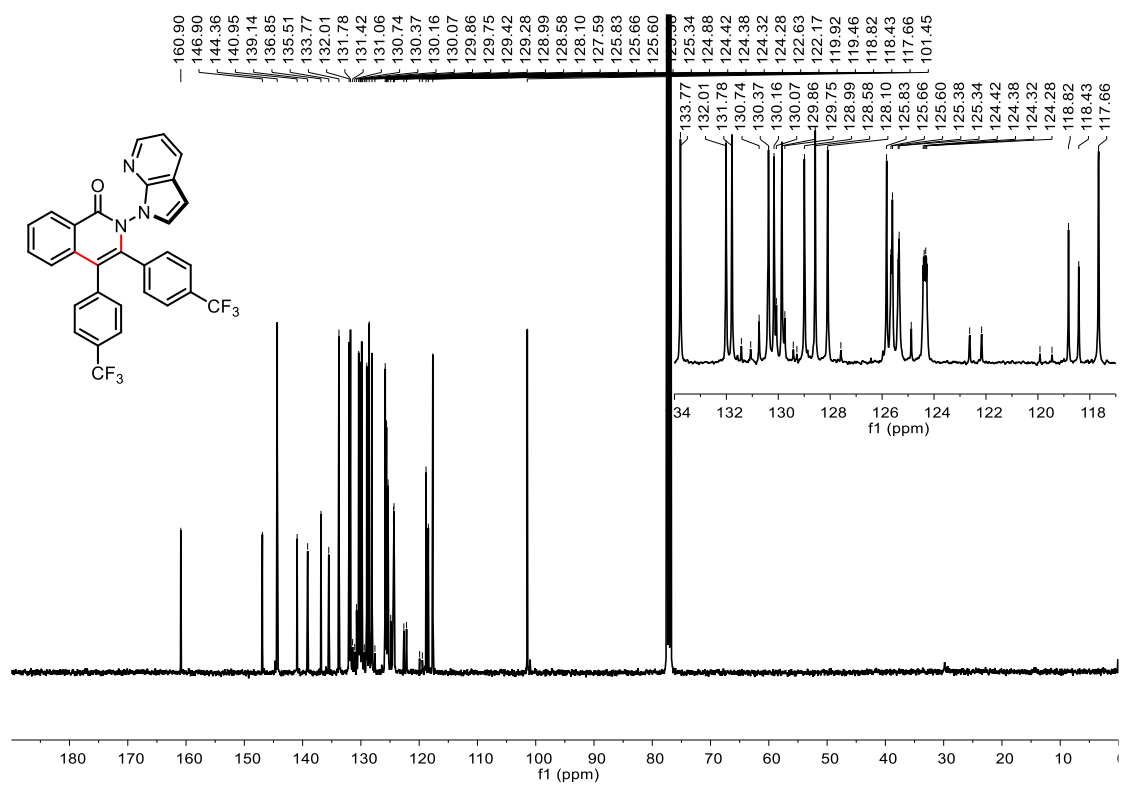

<sup>19</sup>F NMR of **9** (376 MHz, CDCl<sub>3</sub>)

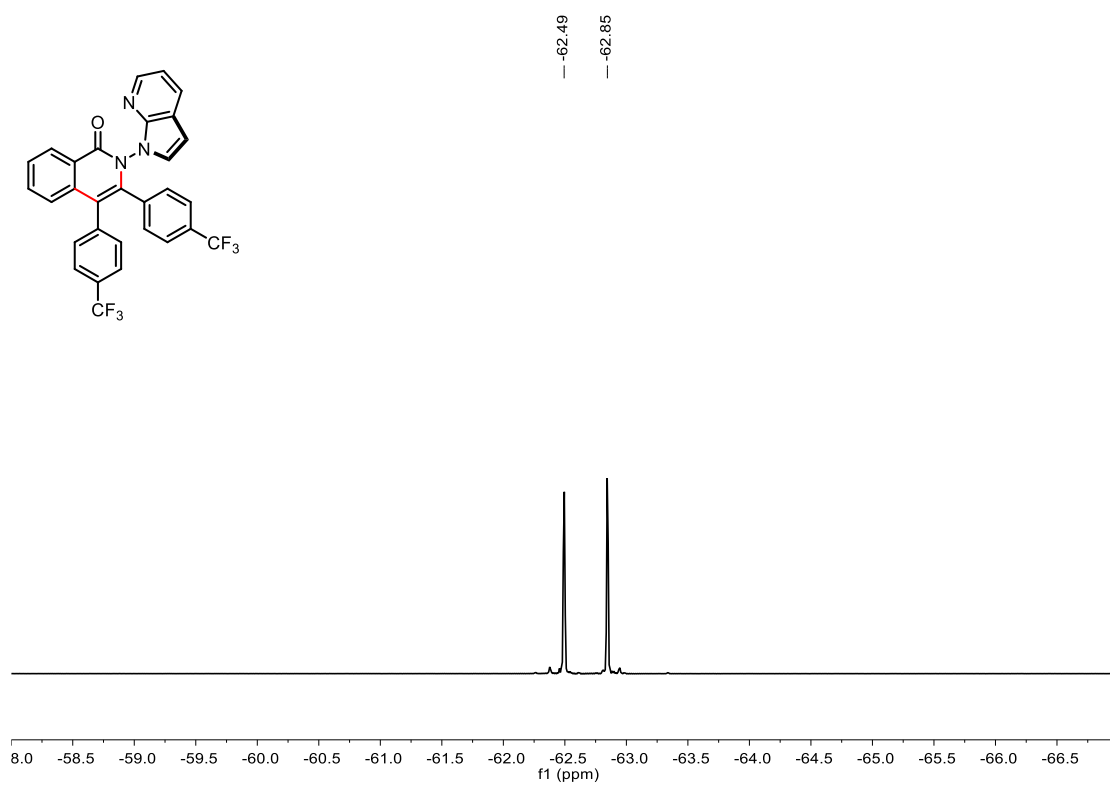



<sup>1</sup>H NMR of **10** (400 MHz, CDCl<sub>3</sub>)

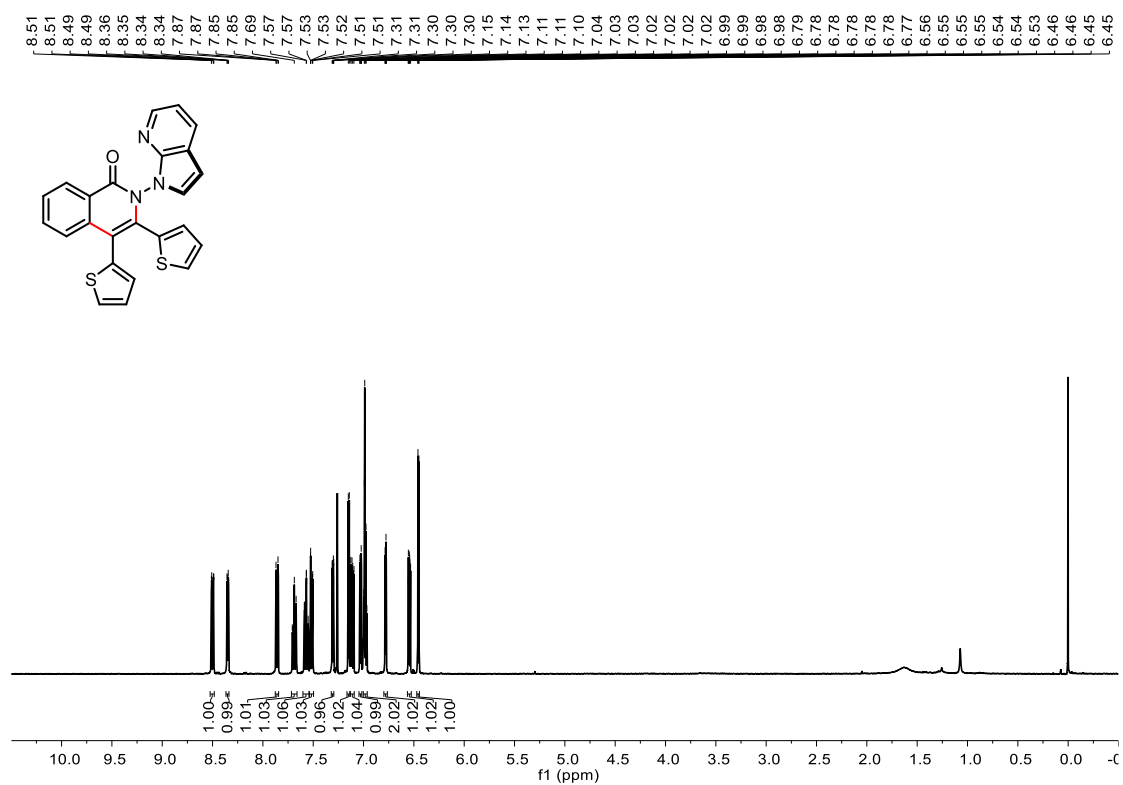

<sup>13</sup>C NMR of **10** (100 MHz, CDCl<sub>3</sub>)

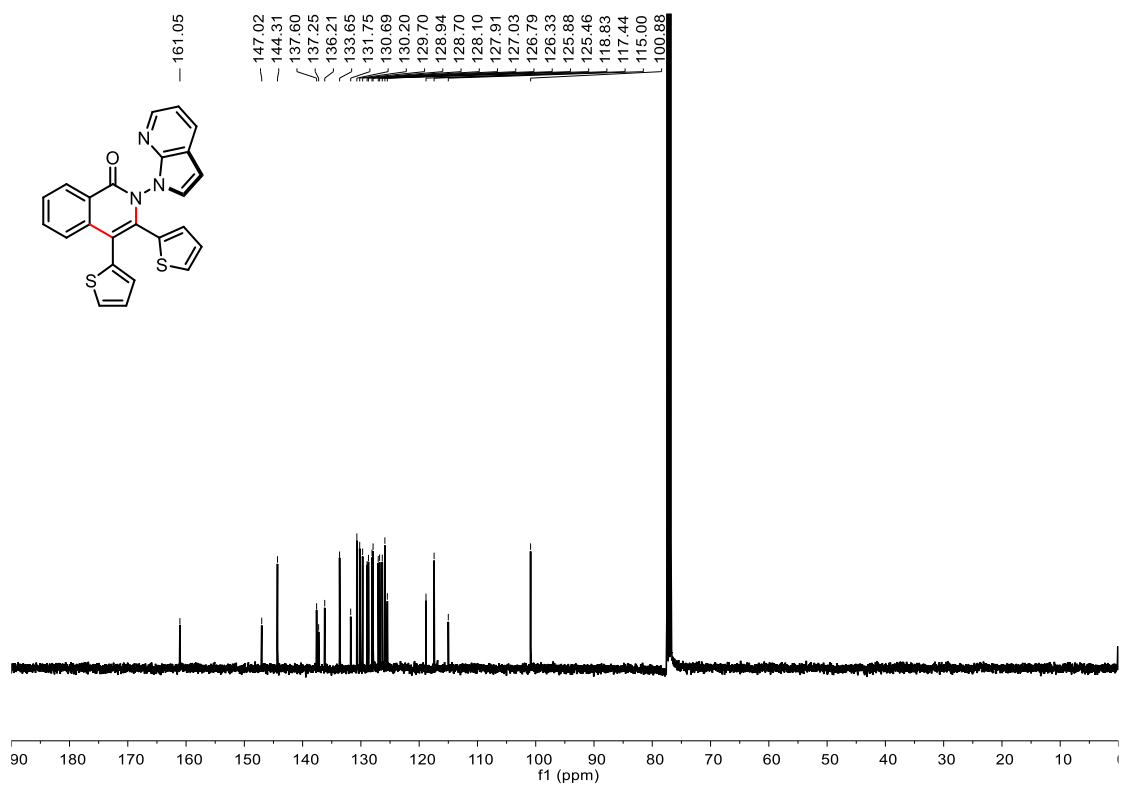

<sup>1</sup>H NMR of **11** (400 MHz, CDCl<sub>3</sub>)

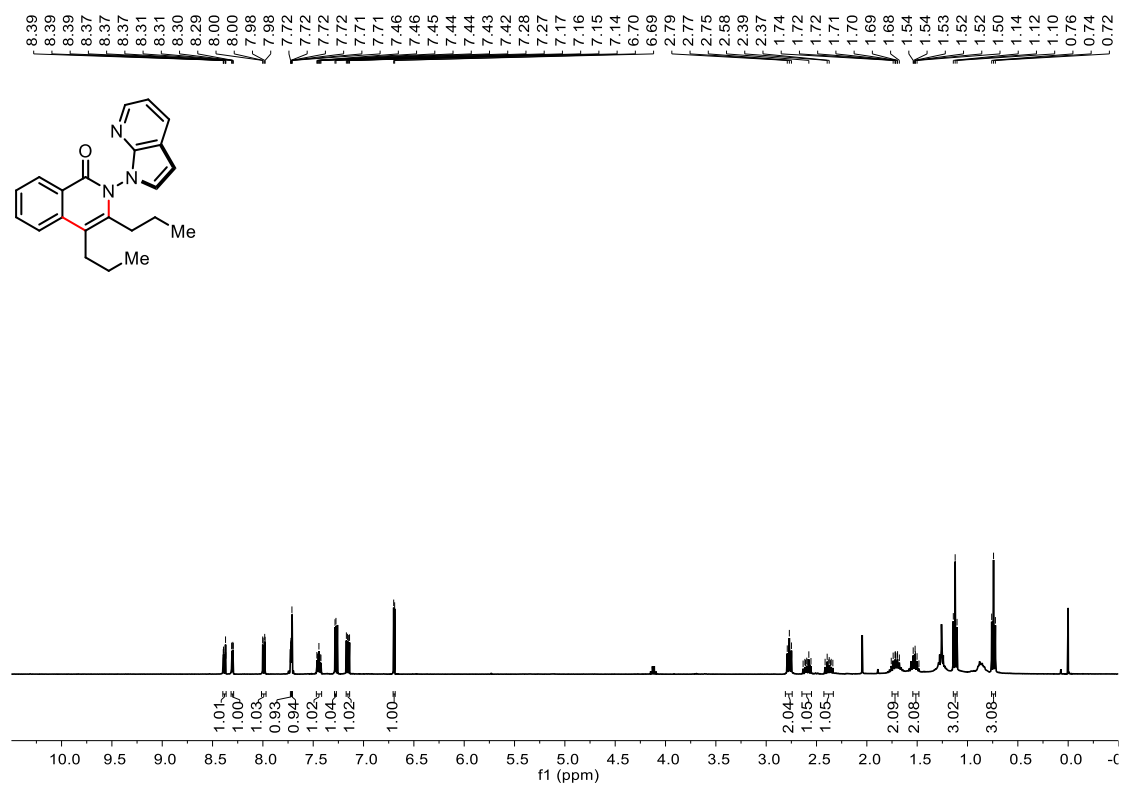

<sup>13</sup>C NMR of **11** (100 MHz, CDCl<sub>3</sub>)

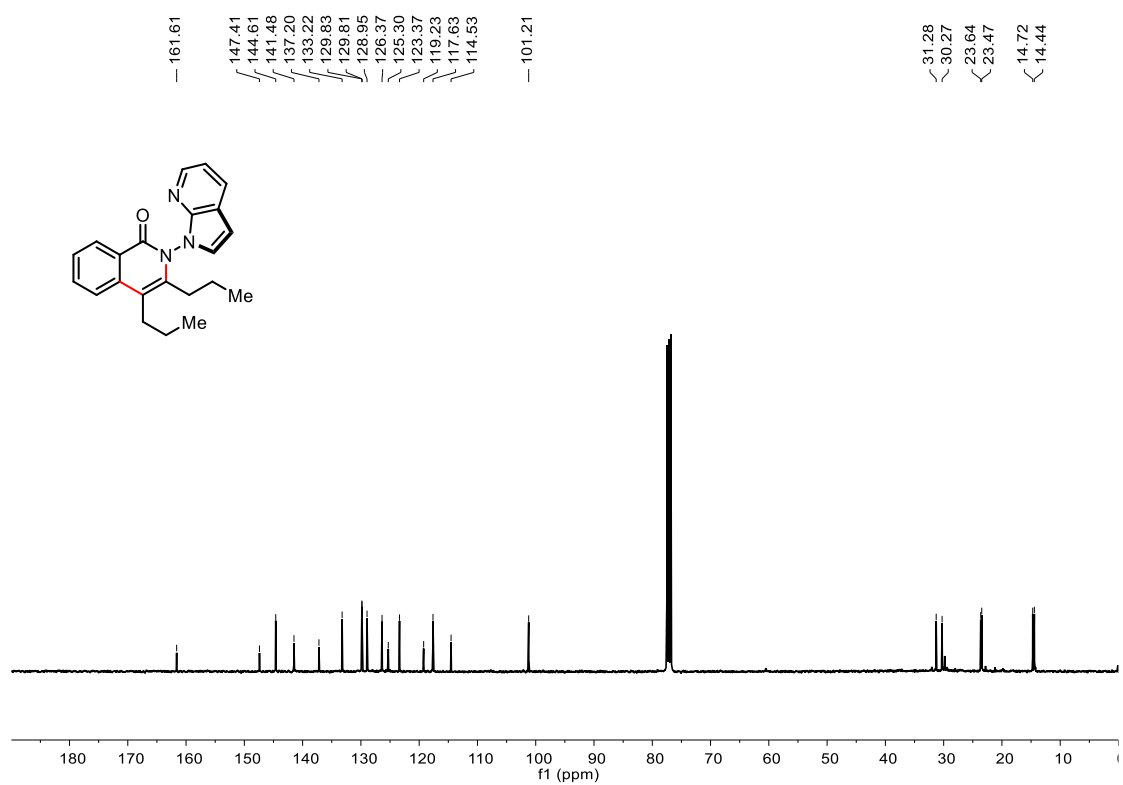

<sup>1</sup>H NMR of **12** (400 MHz, CDCl<sub>3</sub>)

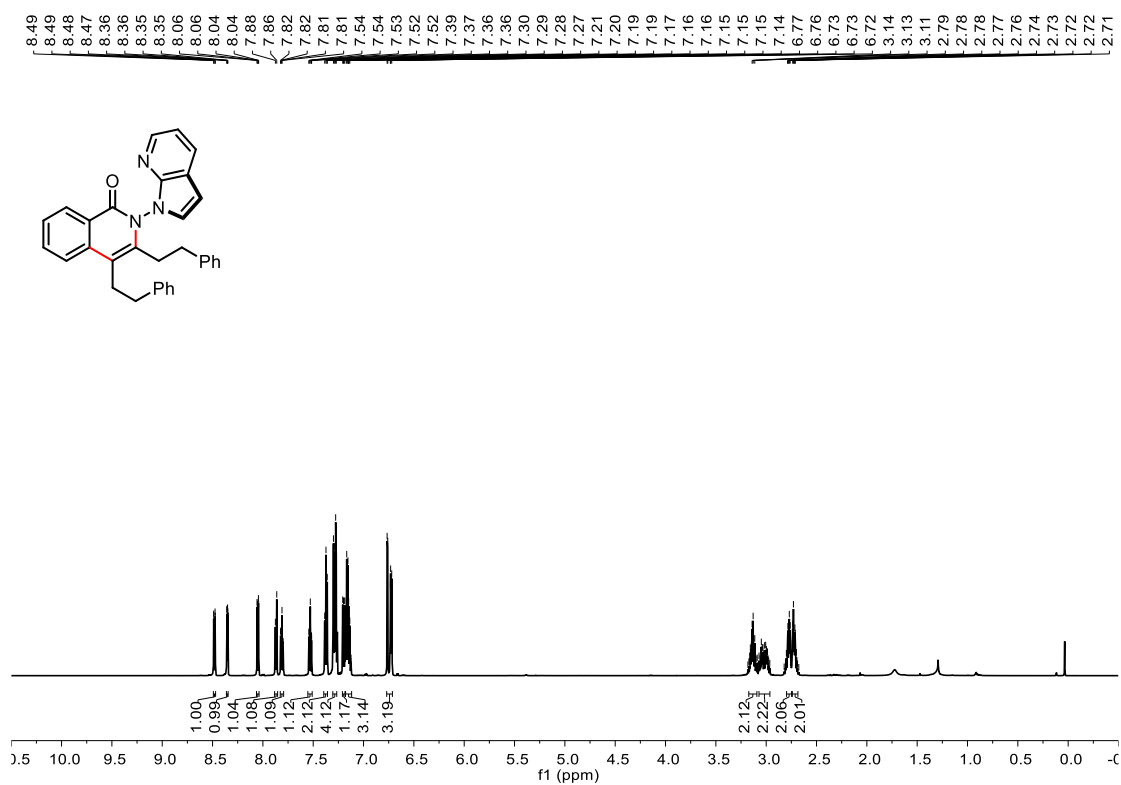

<sup>13</sup>C NMR of **12** (100 MHz, CDCl<sub>3</sub>)

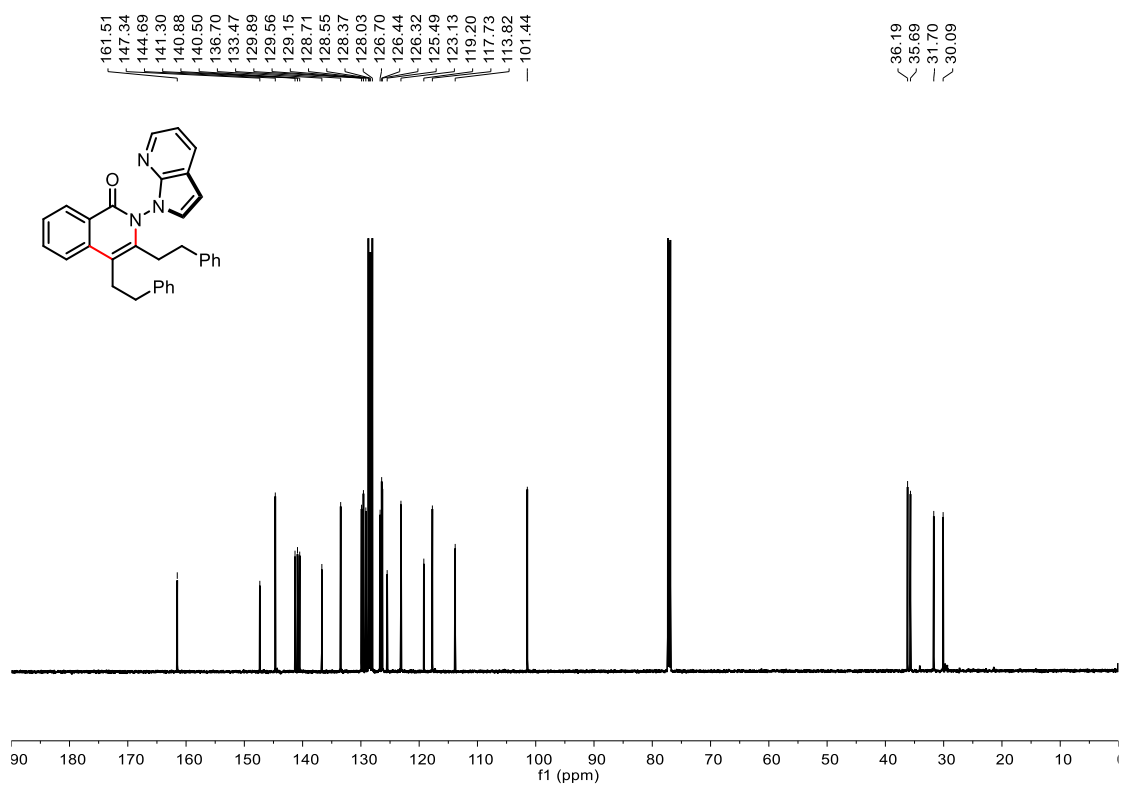

<sup>1</sup>H NMR of **13** (400 MHz, CDCl<sub>3</sub>)

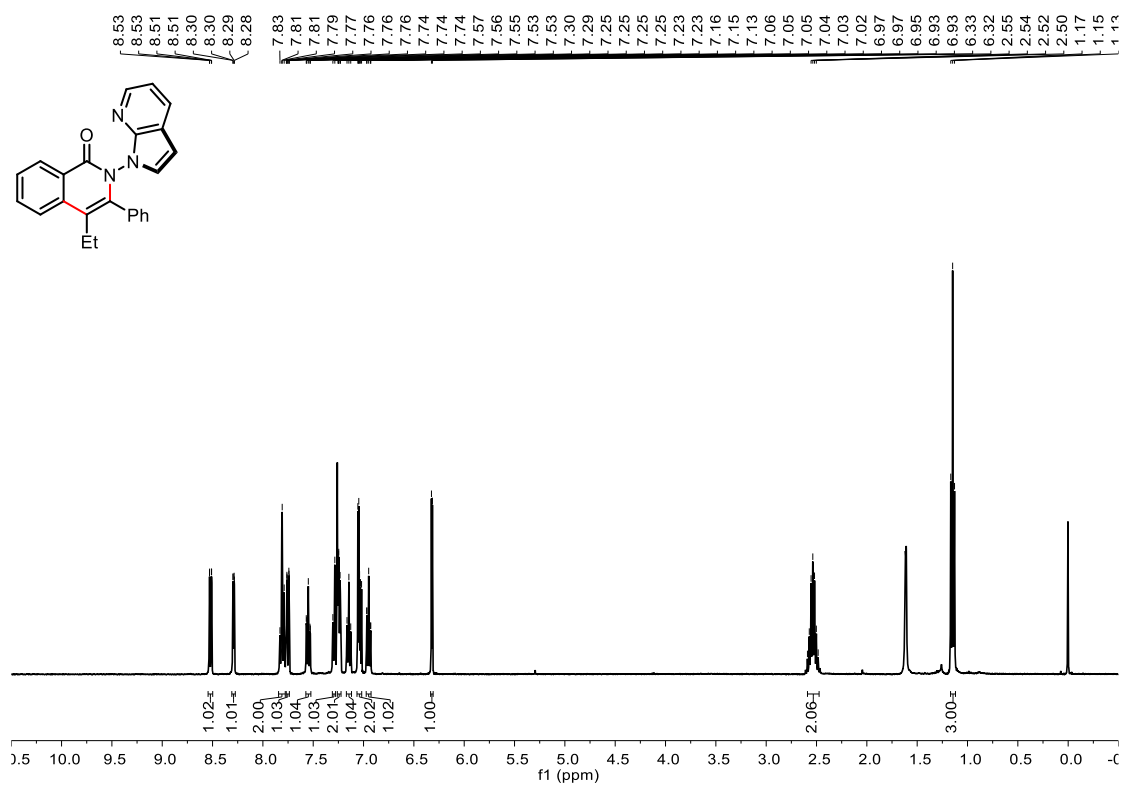

<sup>13</sup>C NMR of **13** (100 MHz, CDCl<sub>3</sub>)

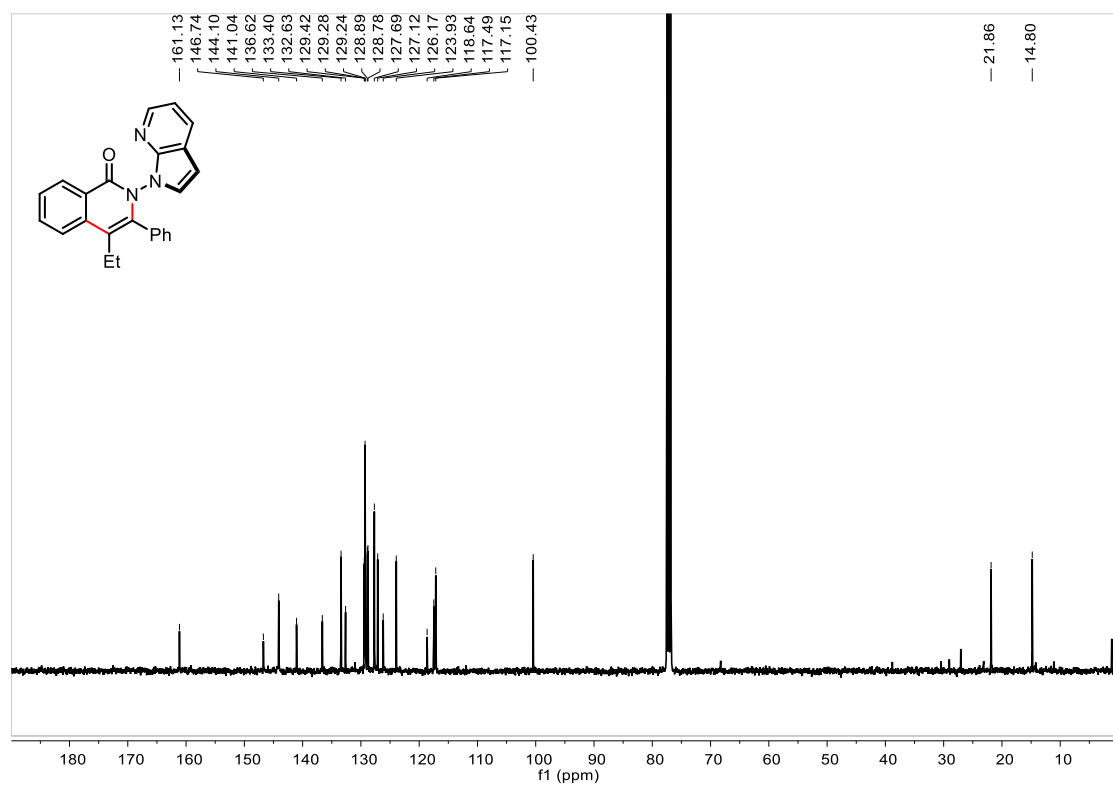

<sup>1</sup>H NMR of **14** (400 MHz, CDCl<sub>3</sub>)

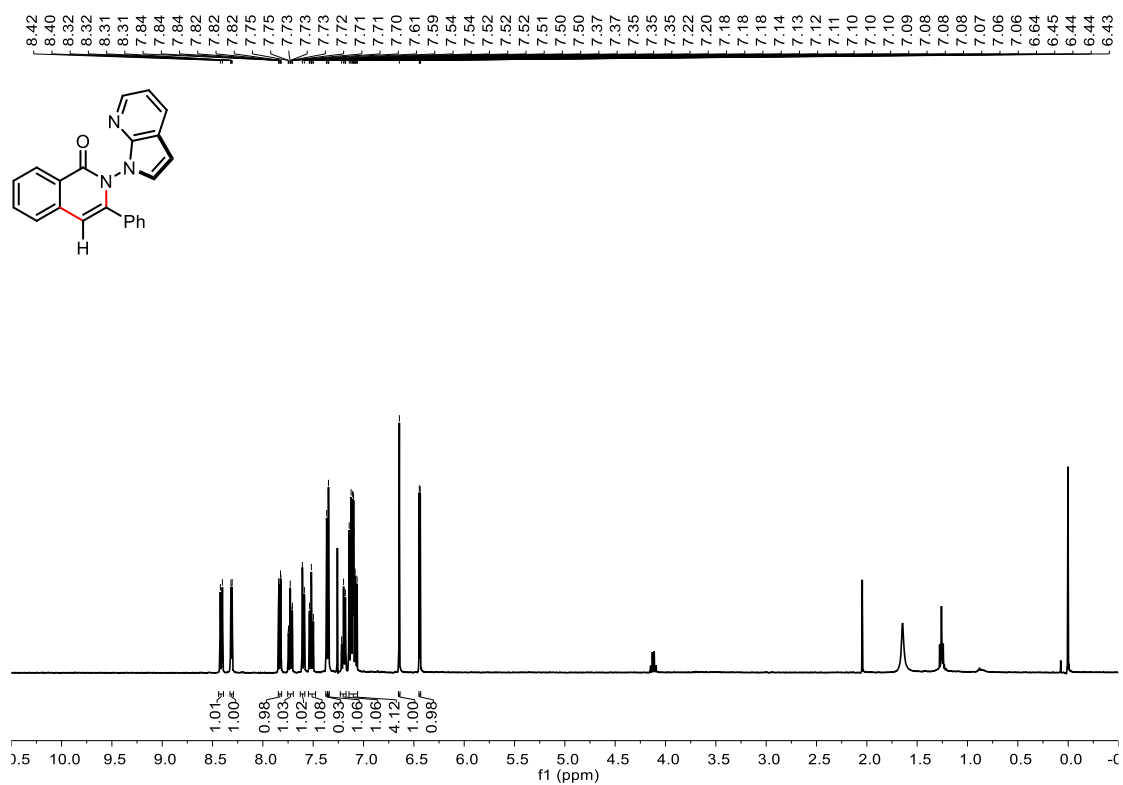

<sup>13</sup>C NMR of **14** (100 MHz, CDCl<sub>3</sub>)

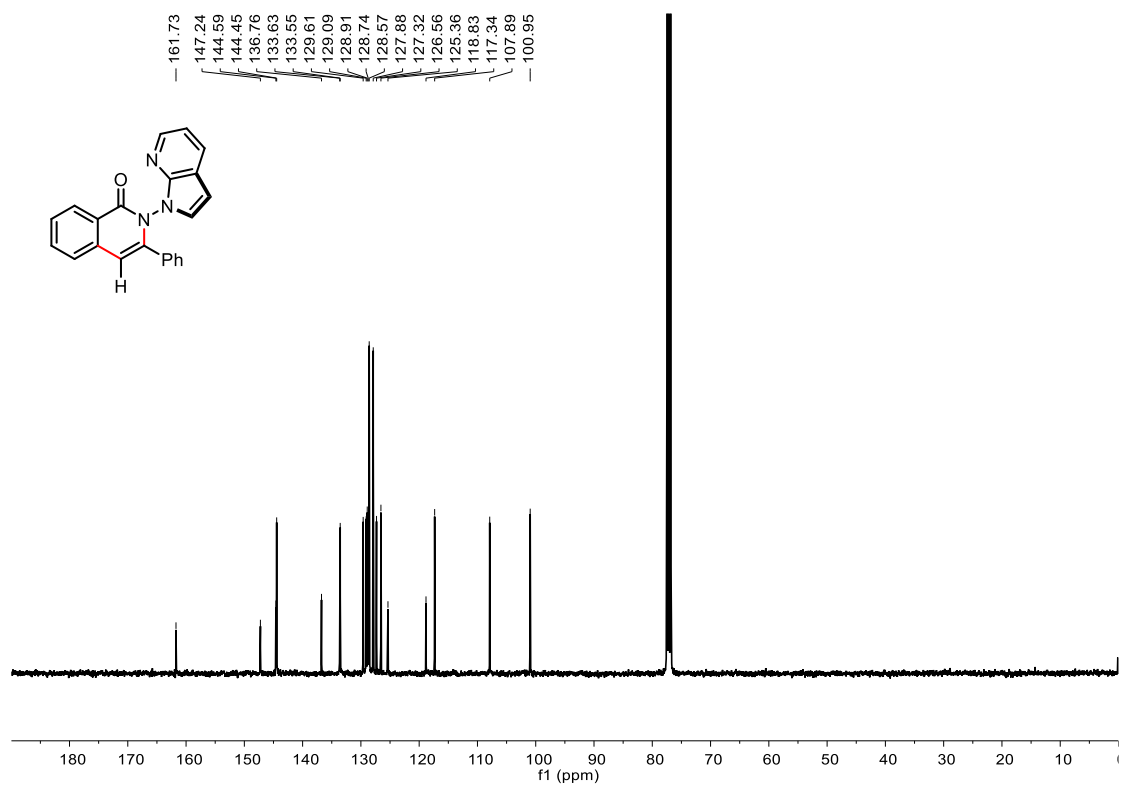

<sup>1</sup>H NMR of **15** (400 MHz, CDCl<sub>3</sub>)

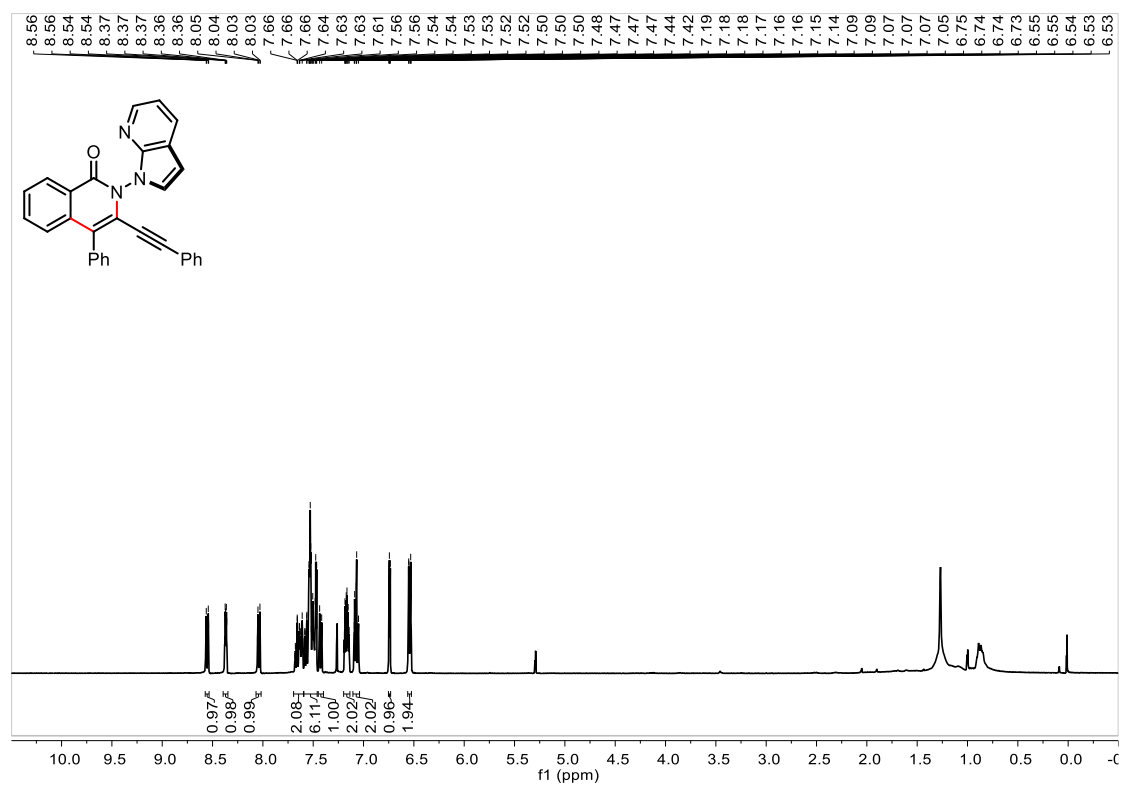

<sup>13</sup>C NMR of **15** (100 MHz, CDCl<sub>3</sub>)

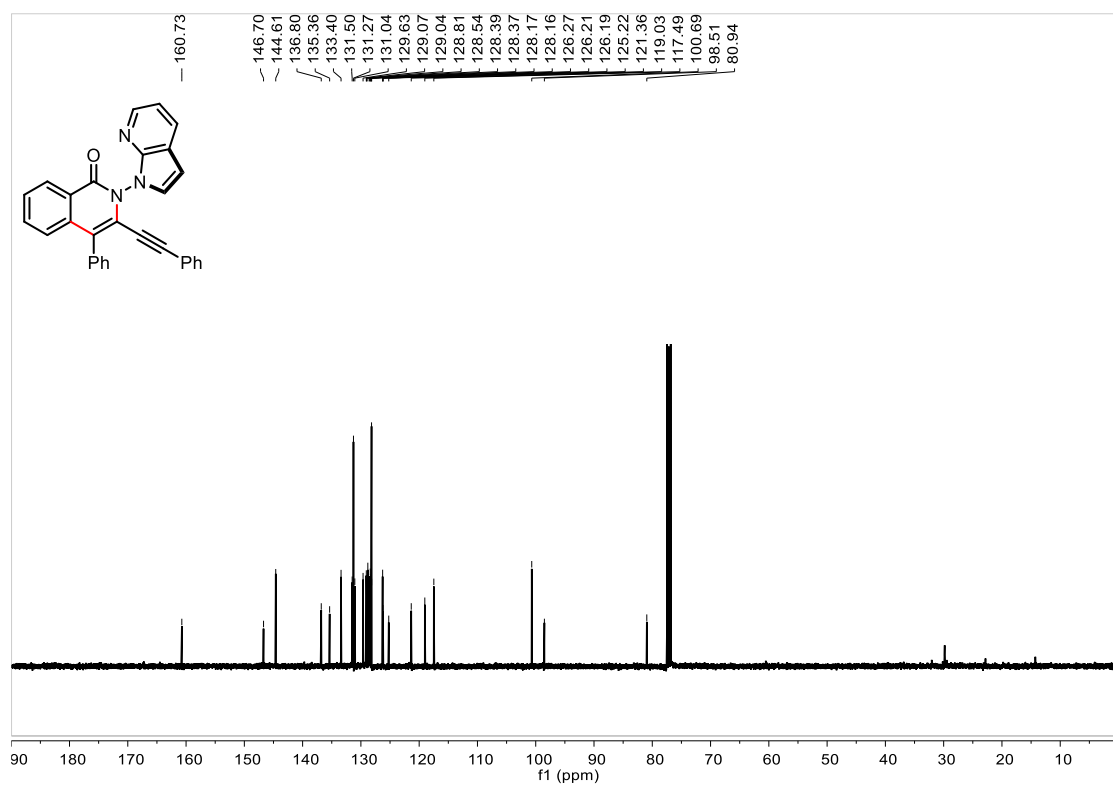

<sup>1</sup>H NMR of **16** (400 MHz, CDCl<sub>3</sub>)

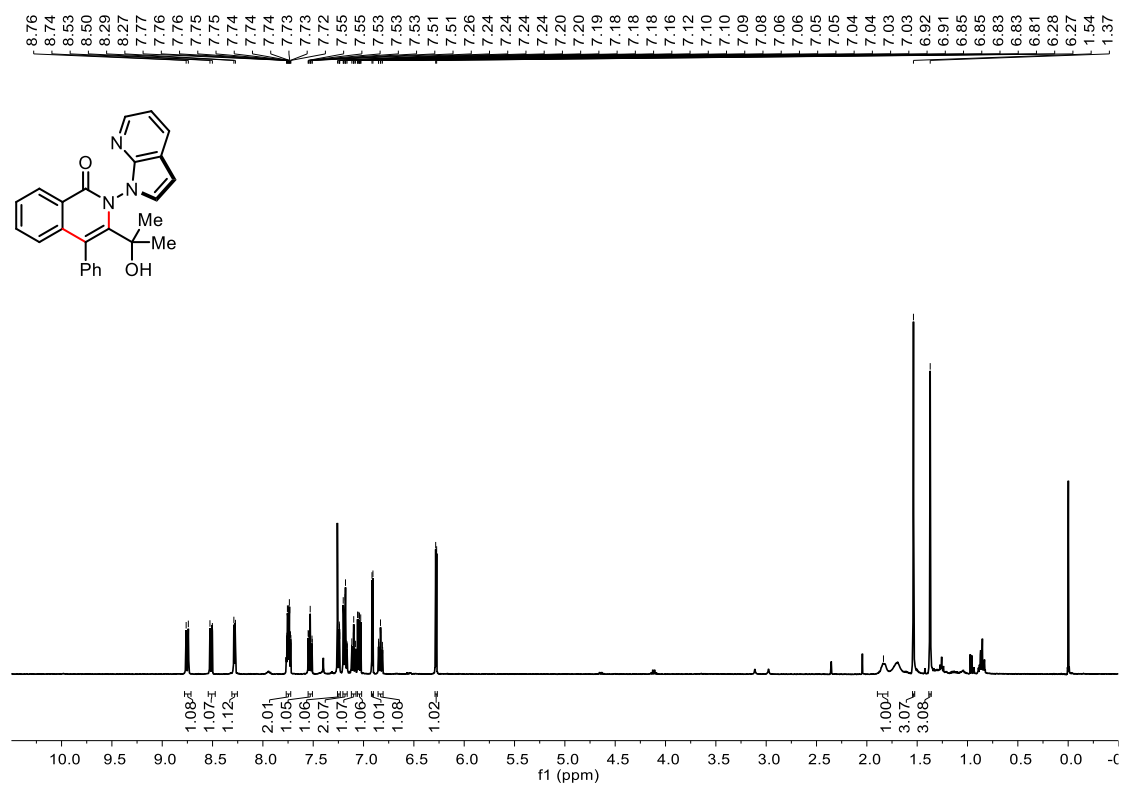

<sup>13</sup>C NMR of **16** (100 MHz, CDCl<sub>3</sub>)

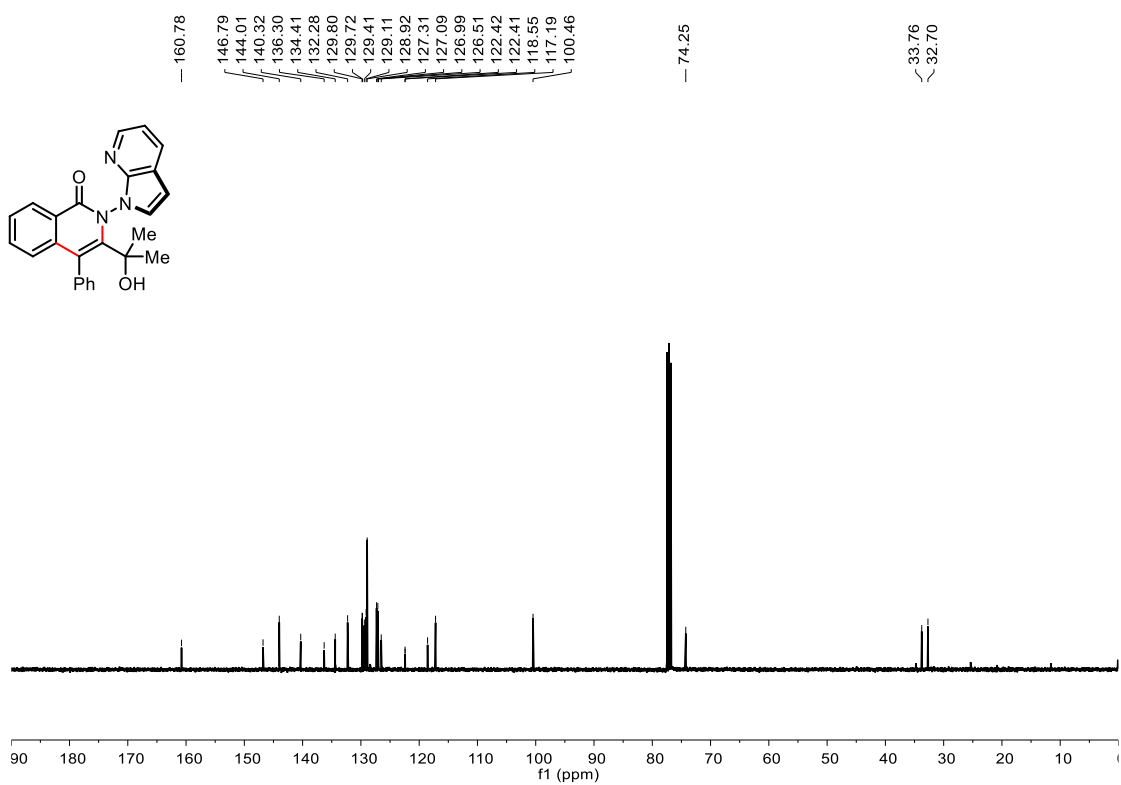

<sup>1</sup>H NMR of 17 (400 MHz, CDCl<sub>3</sub>)

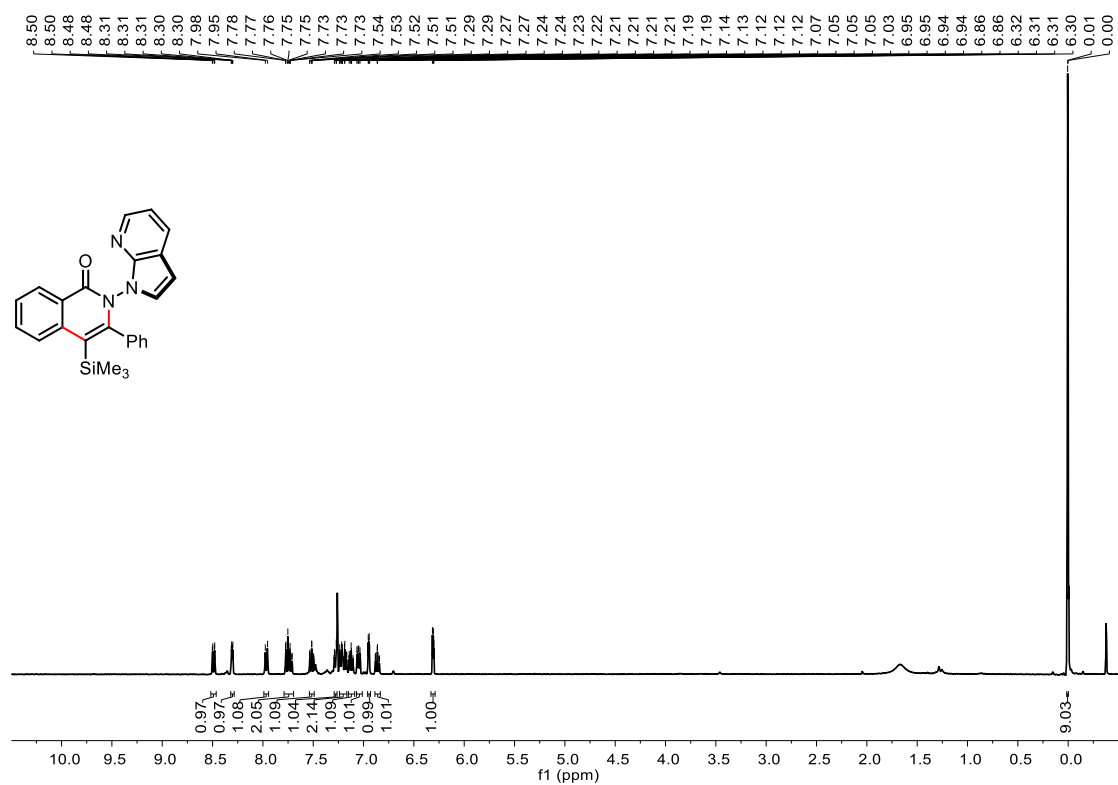

<sup>13</sup>C NMR of 17 (100 MHz, CDCl<sub>3</sub>)

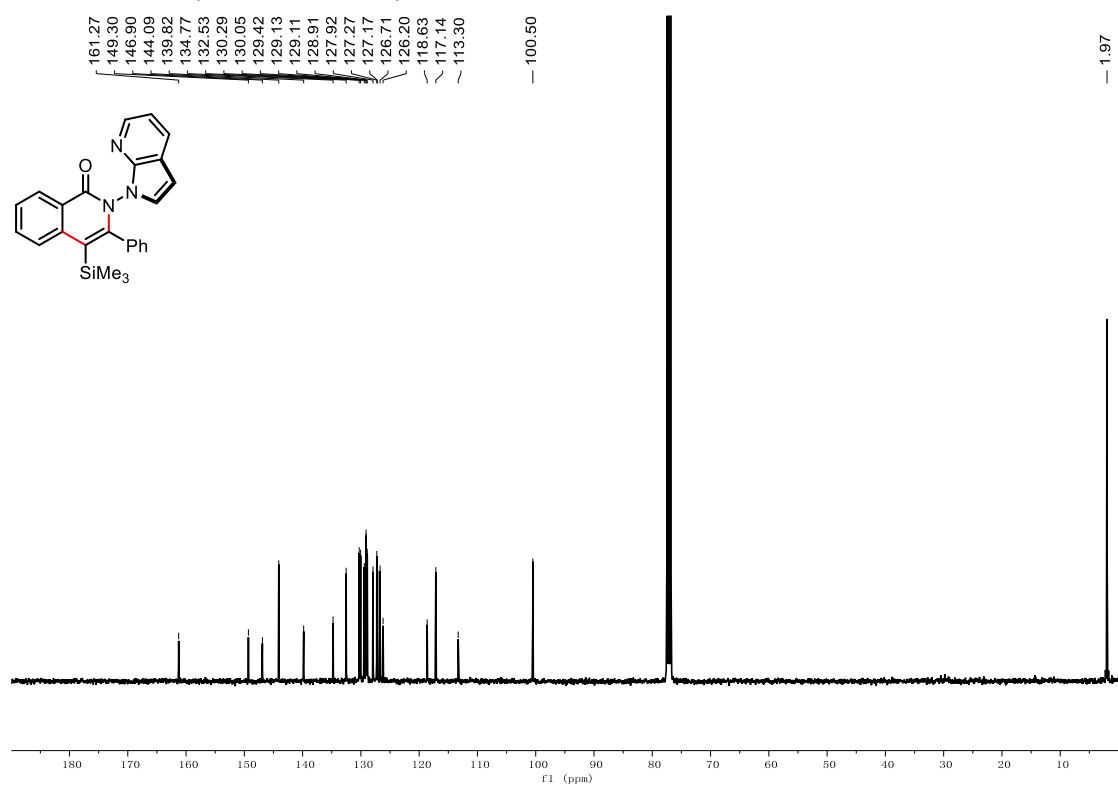



<sup>1</sup>H NMR of **18** (400 MHz, CDCl<sub>3</sub>)

8.50  
8.48  
8.31  
8.30  
8.10  
8.08  
7.88  
7.88  
7.86  
7.85  
7.84  
7.79  
7.79  
7.77  
7.77  
7.65  
7.63  
7.61  
7.38  
7.36  
7.30  
7.29  
7.27  
7.27  
7.21  
7.21  
7.20  
7.19  
7.18  
7.17  
7.08  
7.07  
7.06  
7.05  
7.02  
7.00  
6.98  
6.37  
6.36

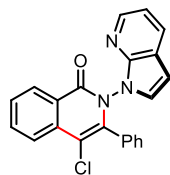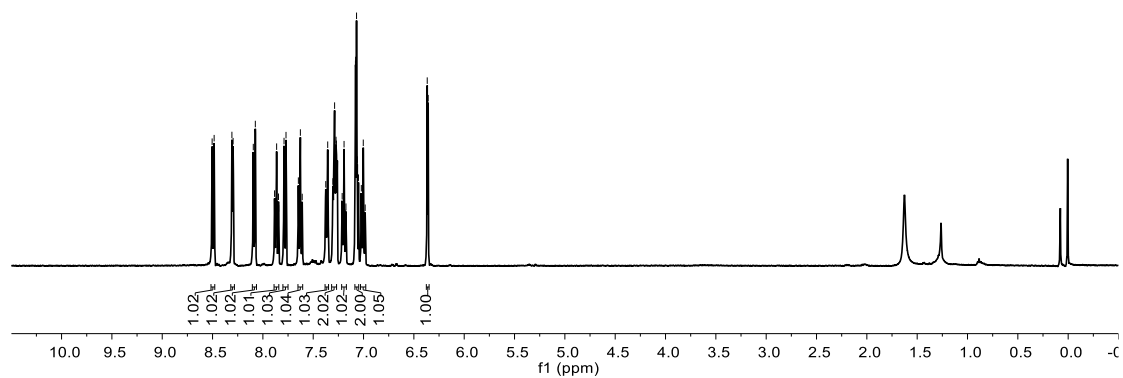

<sup>13</sup>C NMR of **18** (100 MHz, CDCl<sub>3</sub>)

160.65  
146.79  
144.36  
141.56  
135.08  
134.15  
131.56  
129.57  
129.41  
129.25  
129.05  
128.65  
128.43  
127.85  
127.84  
125.36  
124.59  
118.68  
117.47  
111.82  
100.92

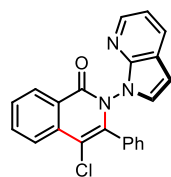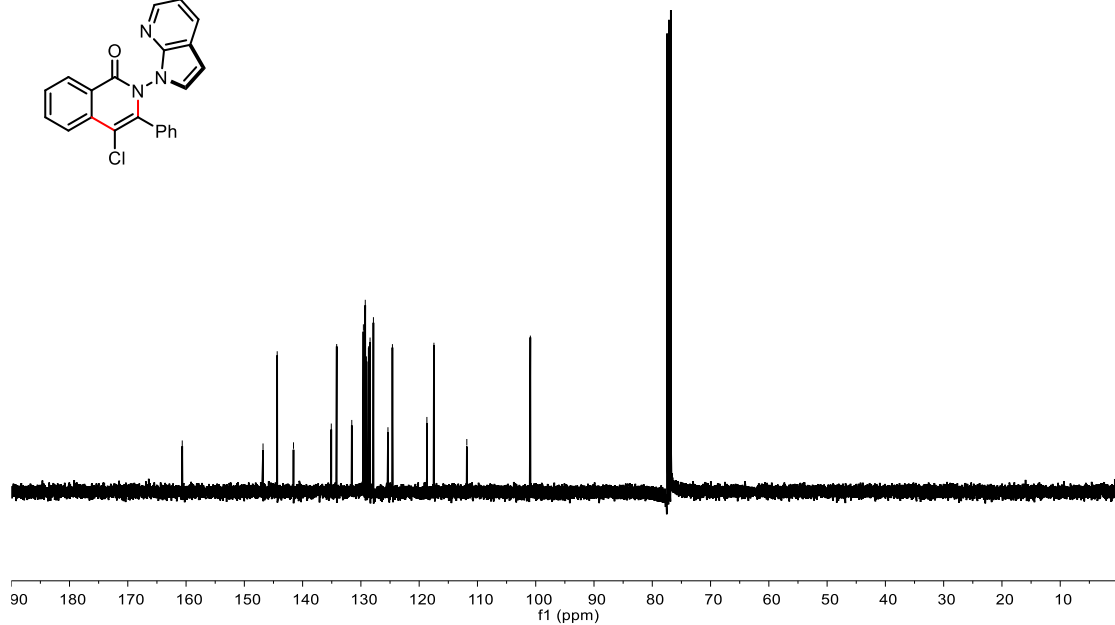

<sup>1</sup>H NMR of **19** (400 MHz, CDCl<sub>3</sub>)

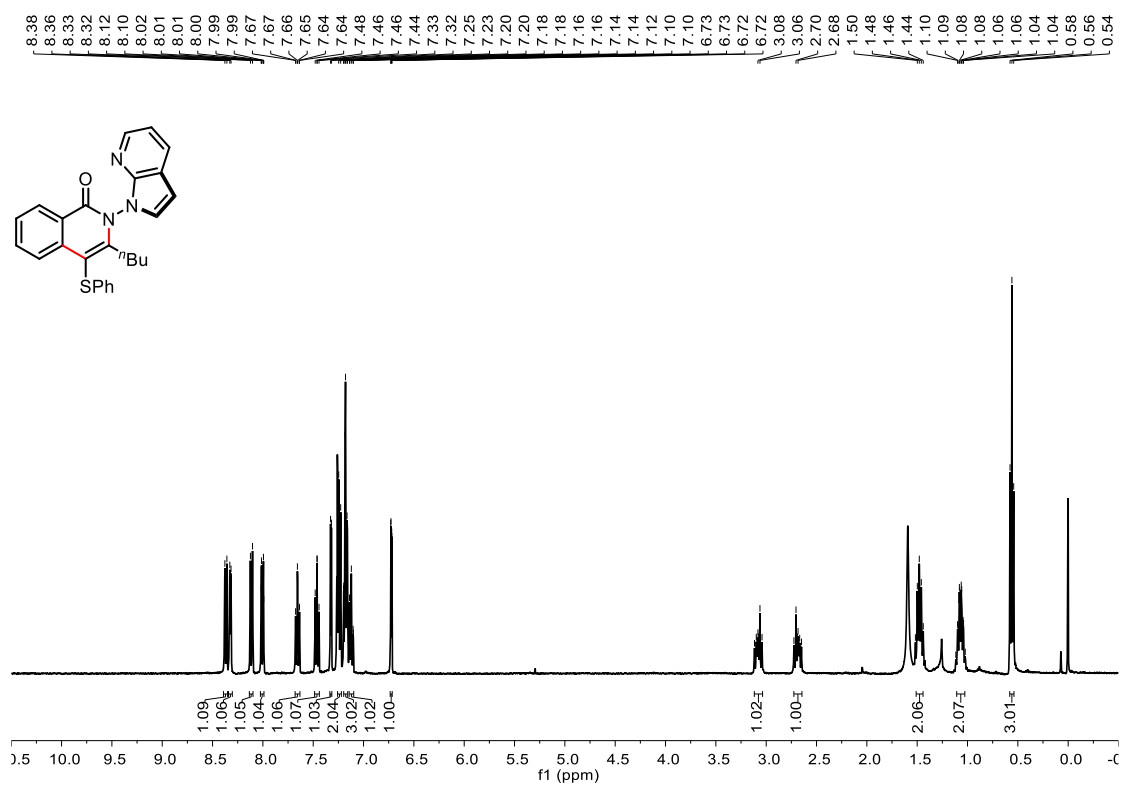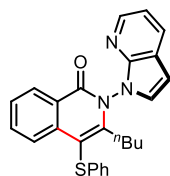

<sup>13</sup>C NMR of **19** (100 MHz, CDCl<sub>3</sub>)

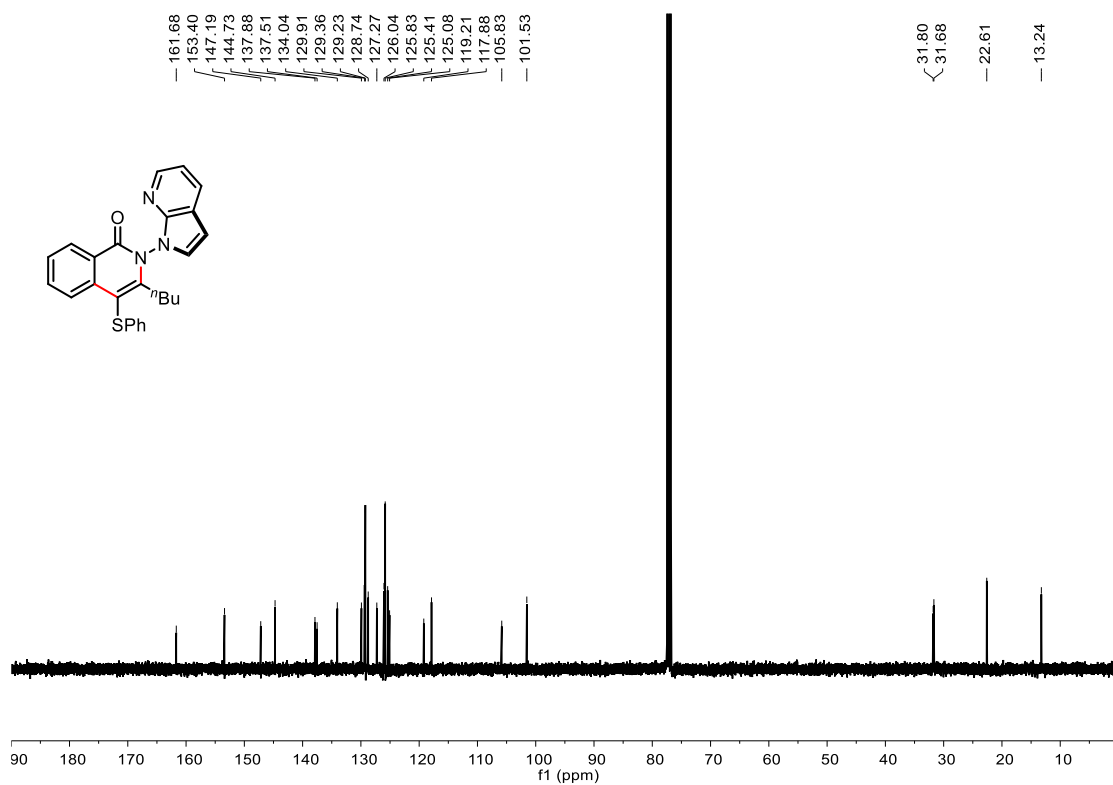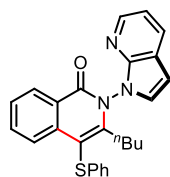

<sup>1</sup>H NMR of **19'** (400 MHz, CDCl<sub>3</sub>)

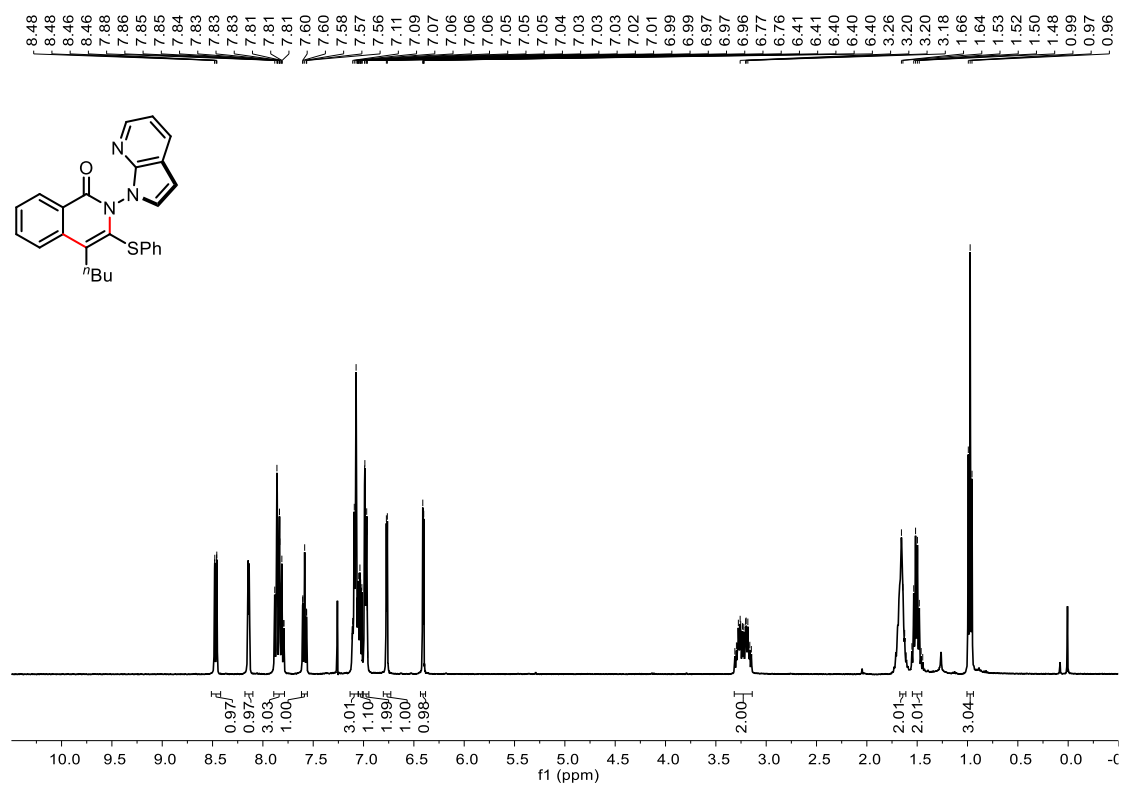

<sup>13</sup>C NMR of **19'** (100 MHz, CDCl<sub>3</sub>)

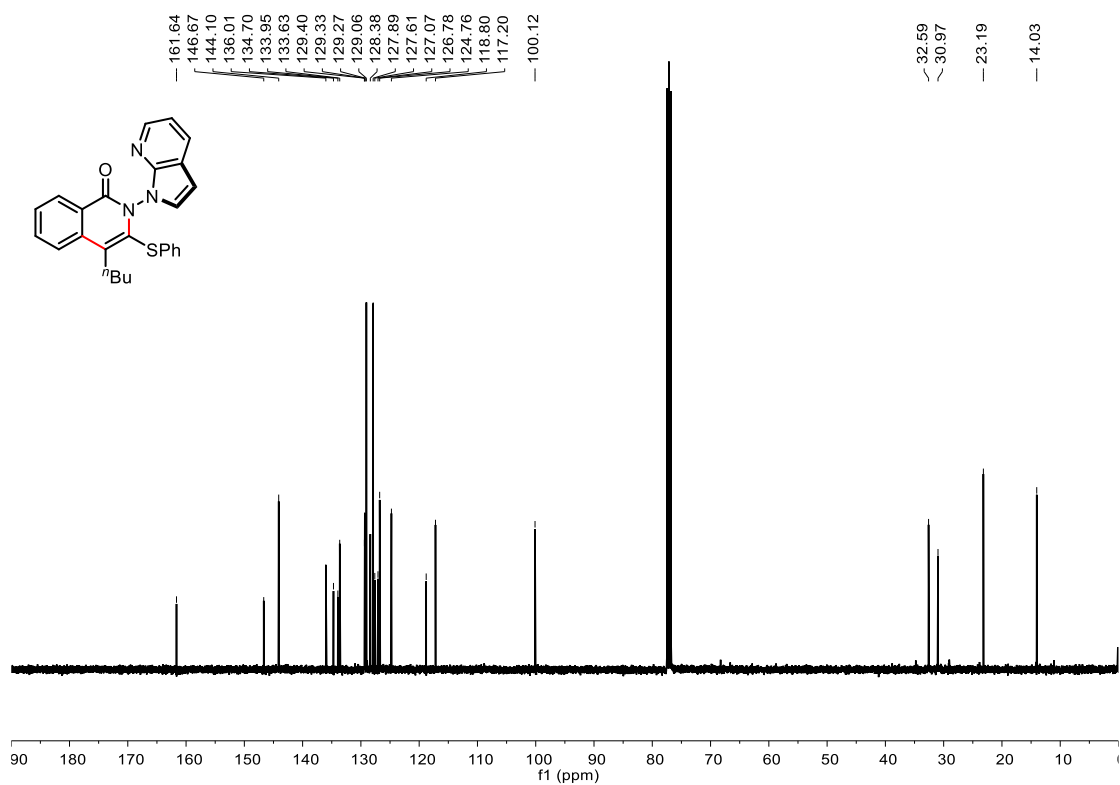

<sup>1</sup>H NMR of **20** (400 MHz, CDCl<sub>3</sub>)

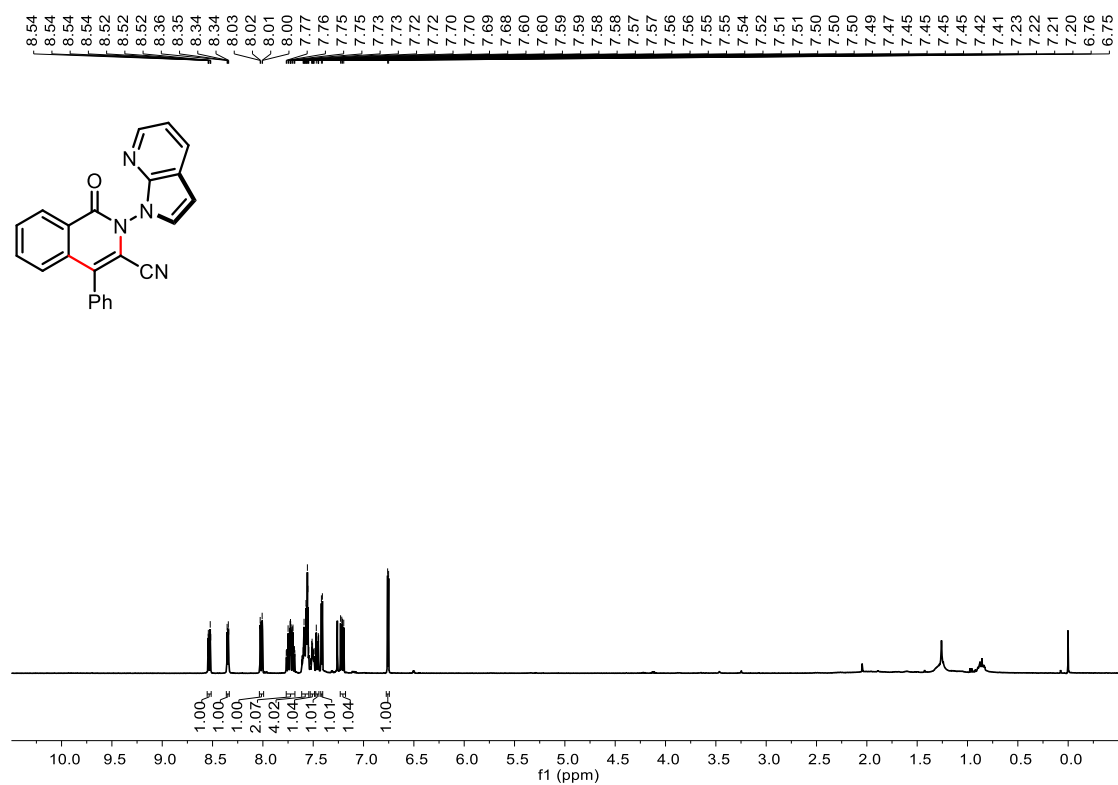

<sup>13</sup>C NMR of **20** (100 MHz, CDCl<sub>3</sub>)

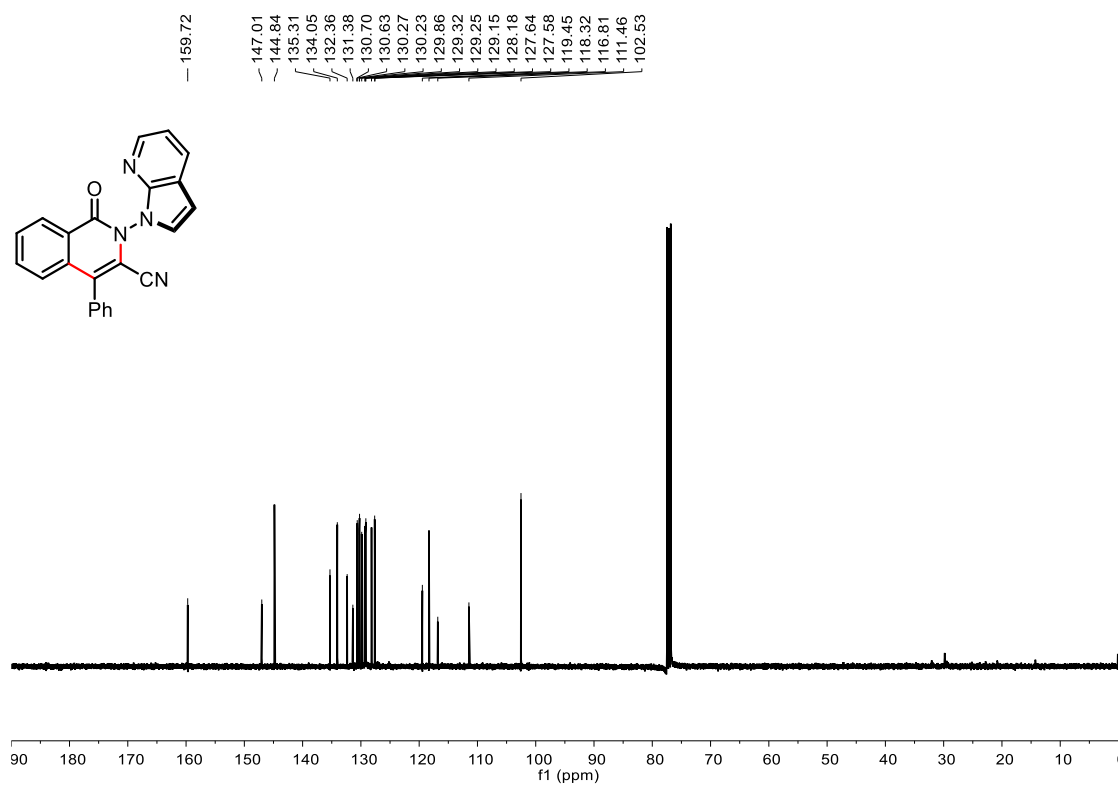

<sup>1</sup>H NMR of **21** (400 MHz, CDCl<sub>3</sub>)

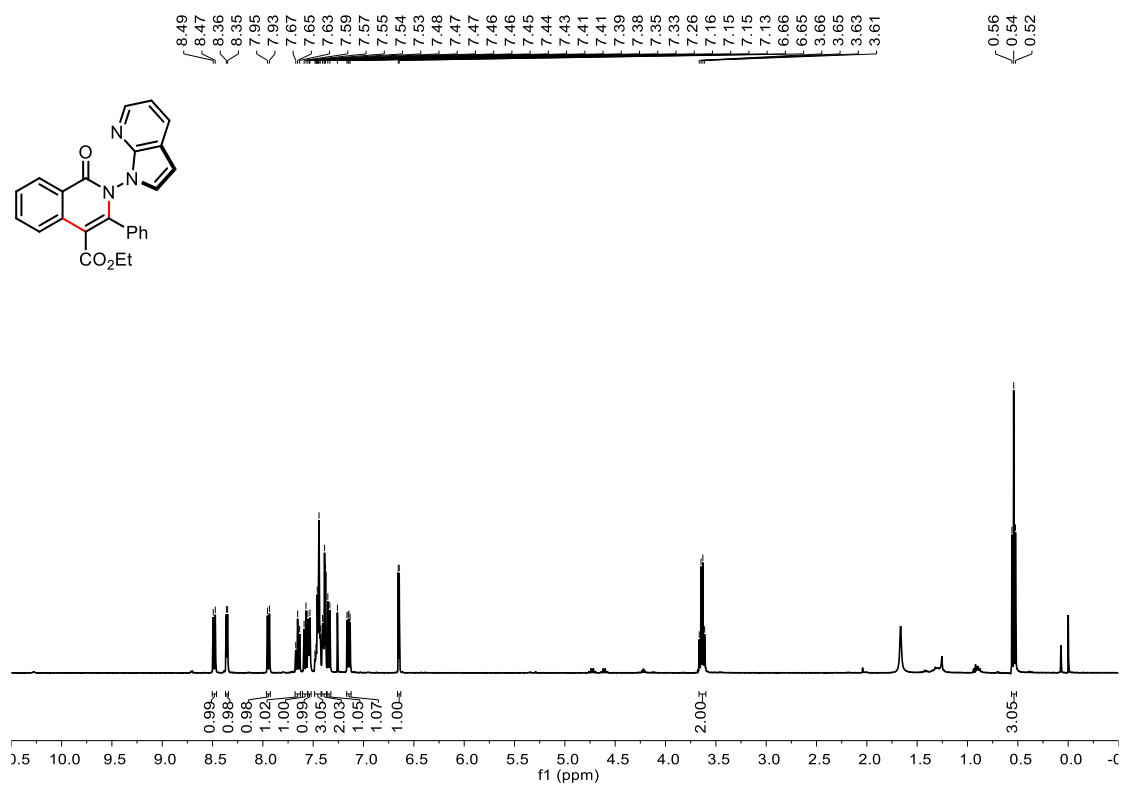

<sup>13</sup>C NMR of **21** (400 MHz, CDCl<sub>3</sub>)

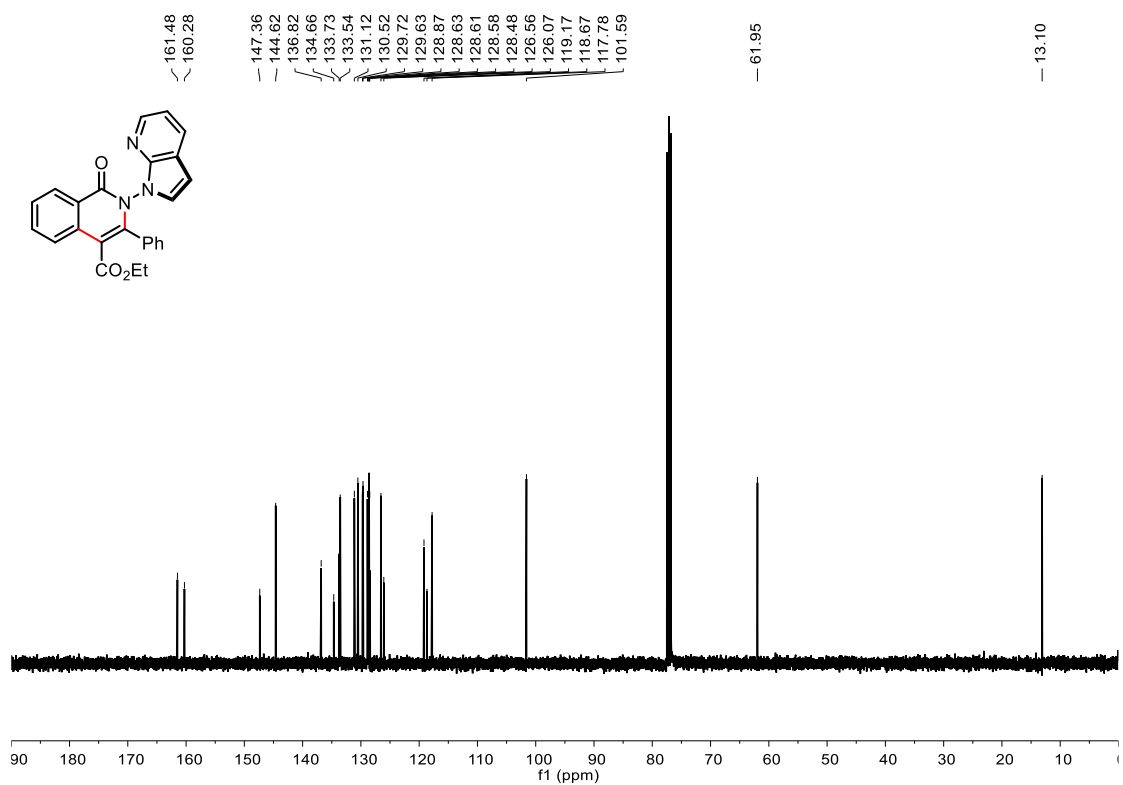

<sup>1</sup>H NMR of **21'** (400 MHz, CDCl<sub>3</sub>)

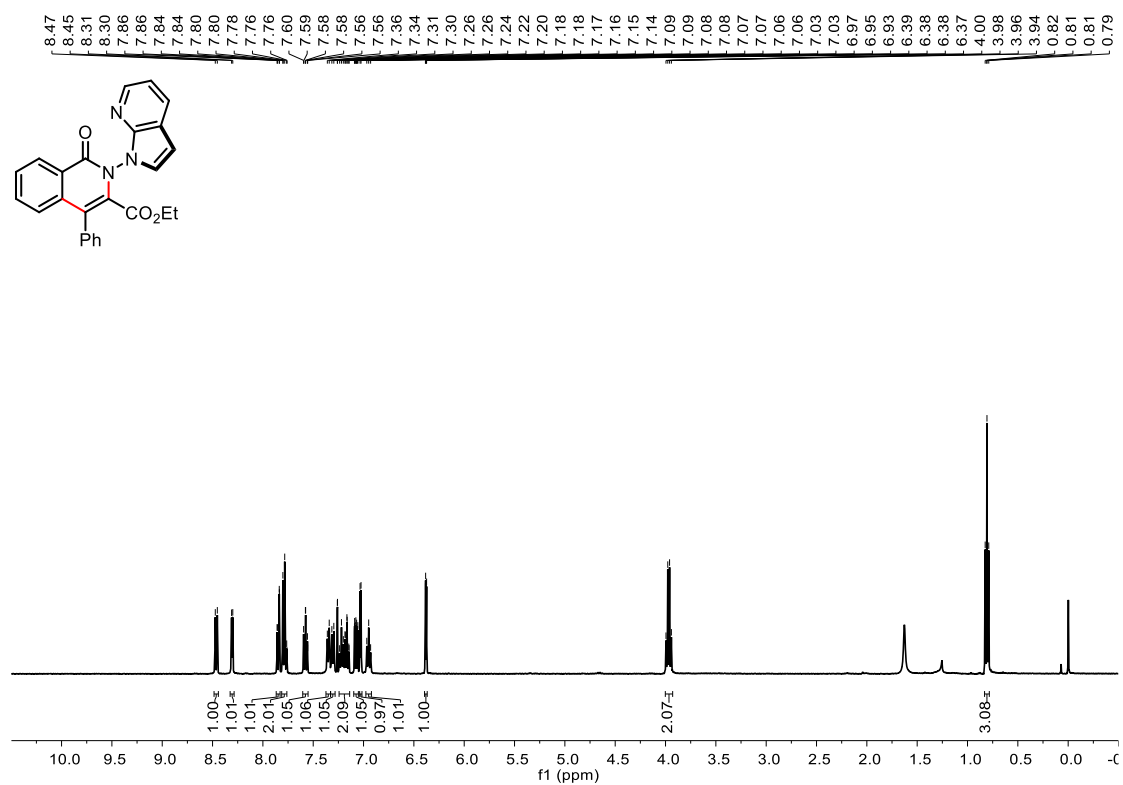

<sup>13</sup>C NMR of **21'** (100 MHz, CDCl<sub>3</sub>)

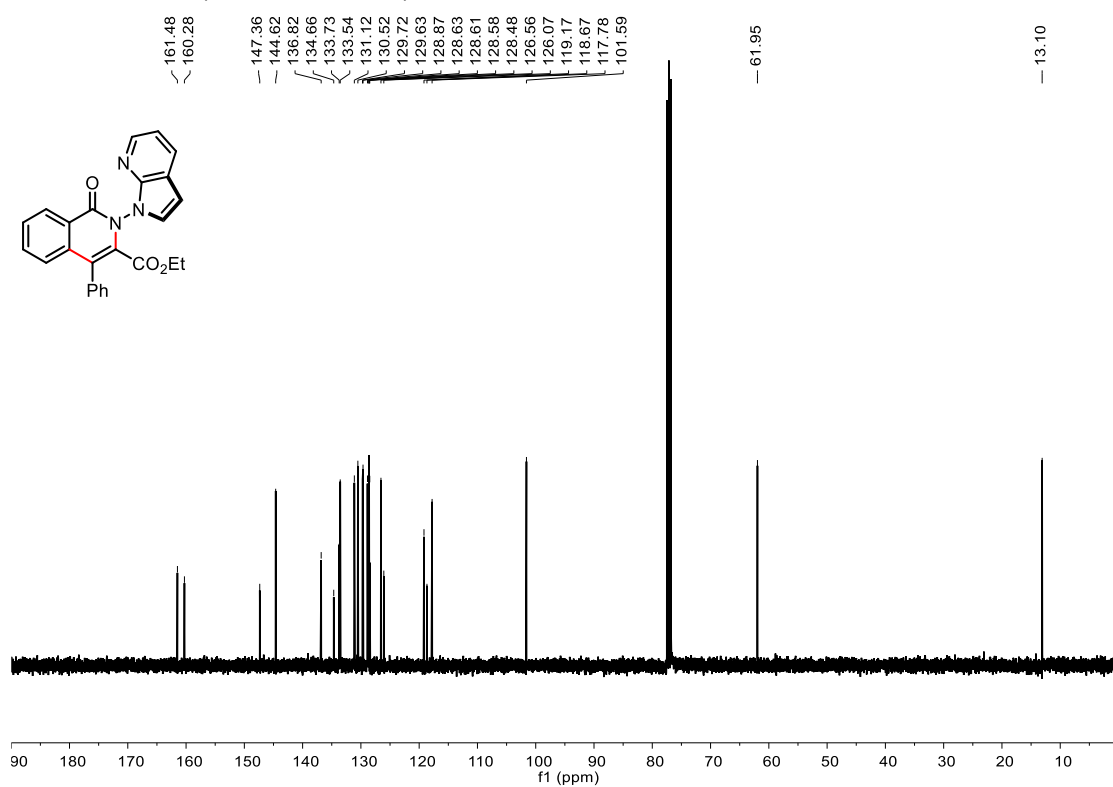

<sup>1</sup>H NMR of **22** (400 MHz, CDCl<sub>3</sub>)

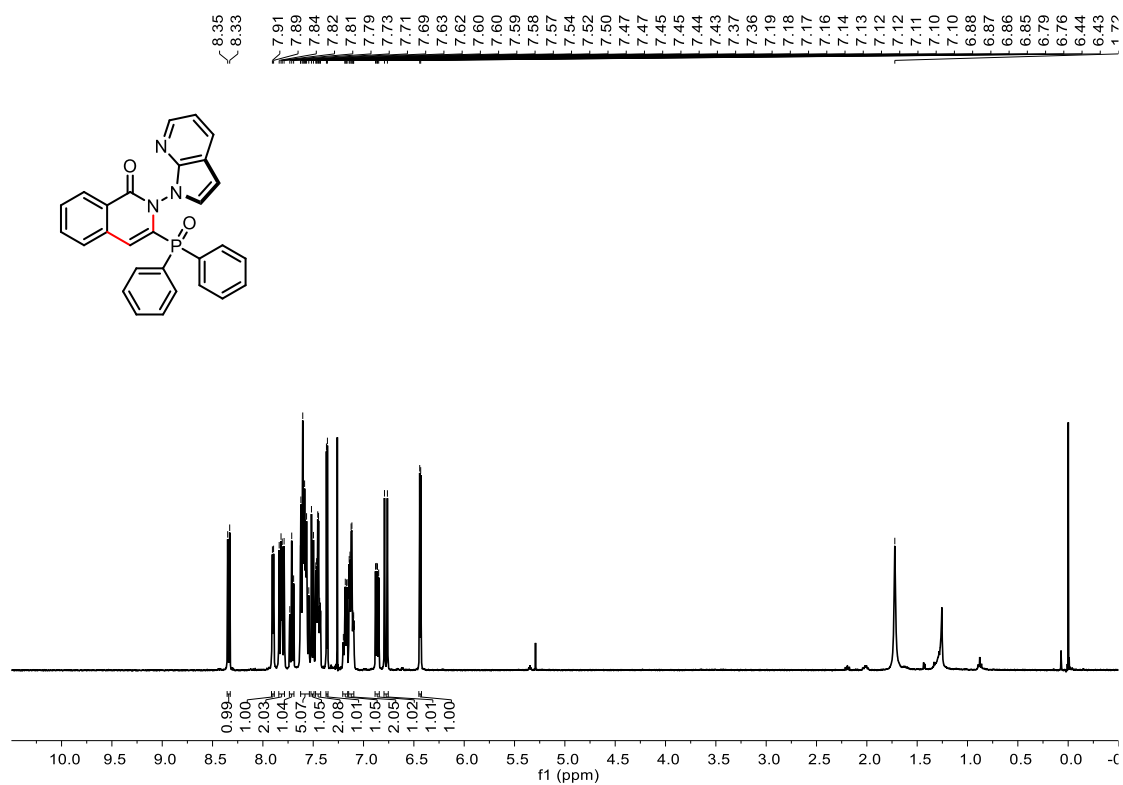

<sup>13</sup>C NMR of **22** (100 MHz, CDCl<sub>3</sub>)

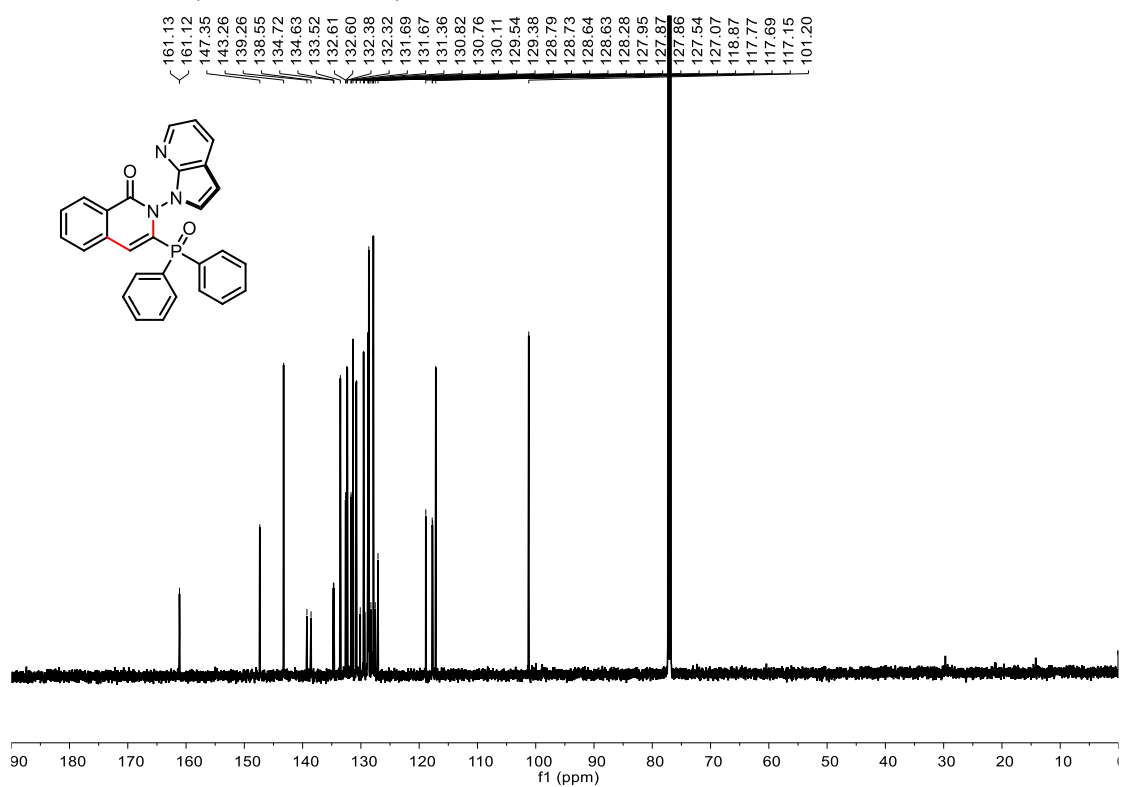

<sup>31</sup>P NMR of **22** (162 MHz, CDCl<sub>3</sub>)

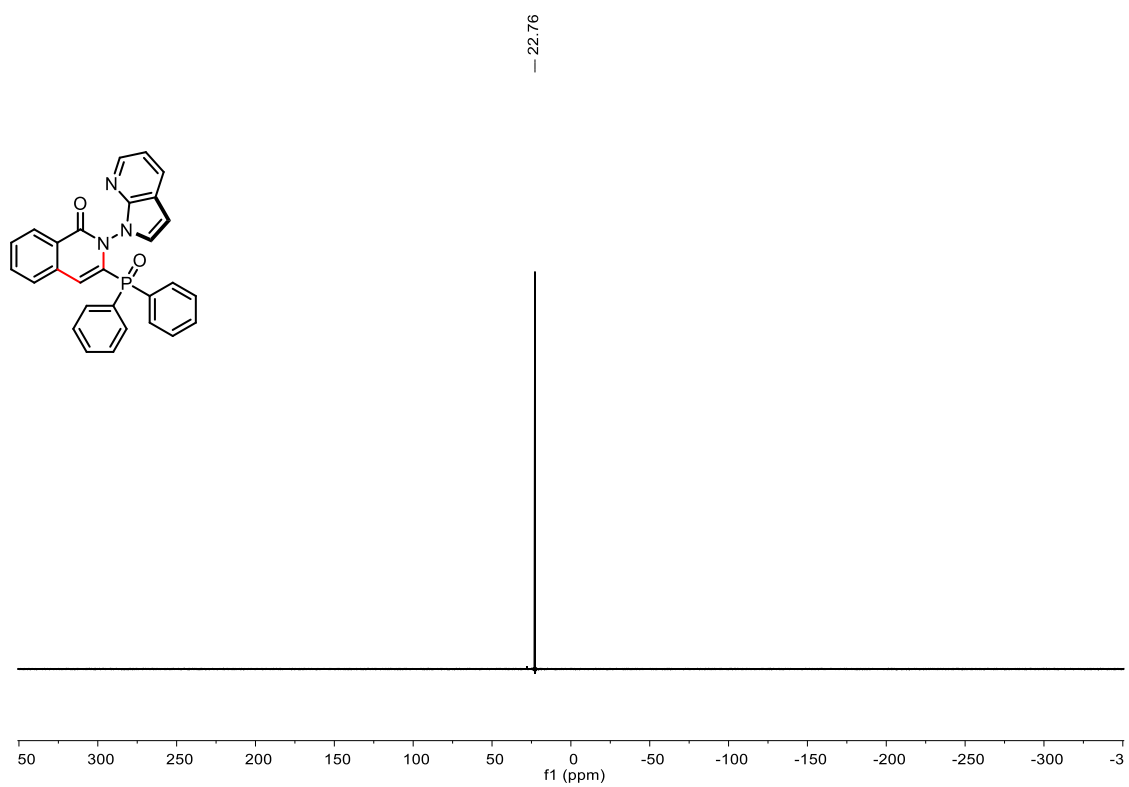



<sup>1</sup>H NMR of **23** (400 MHz, CDCl<sub>3</sub>)

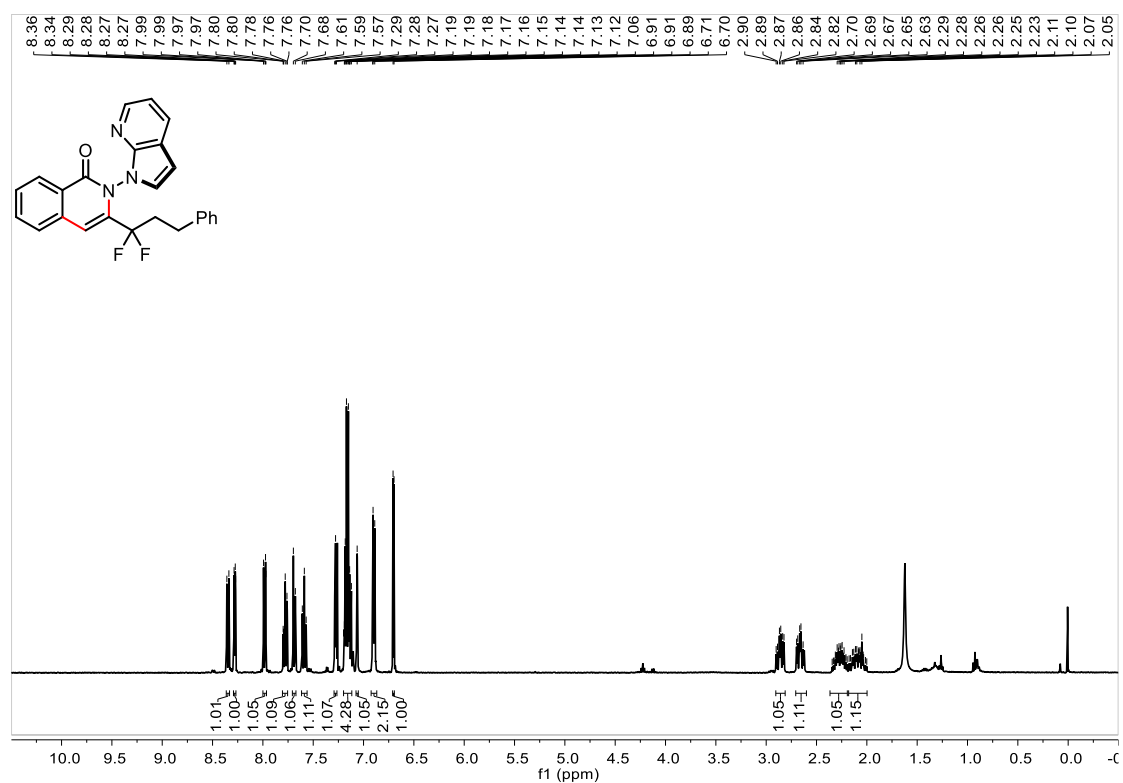

<sup>13</sup>C NMR of **23** (100 MHz, CDCl<sub>3</sub>)

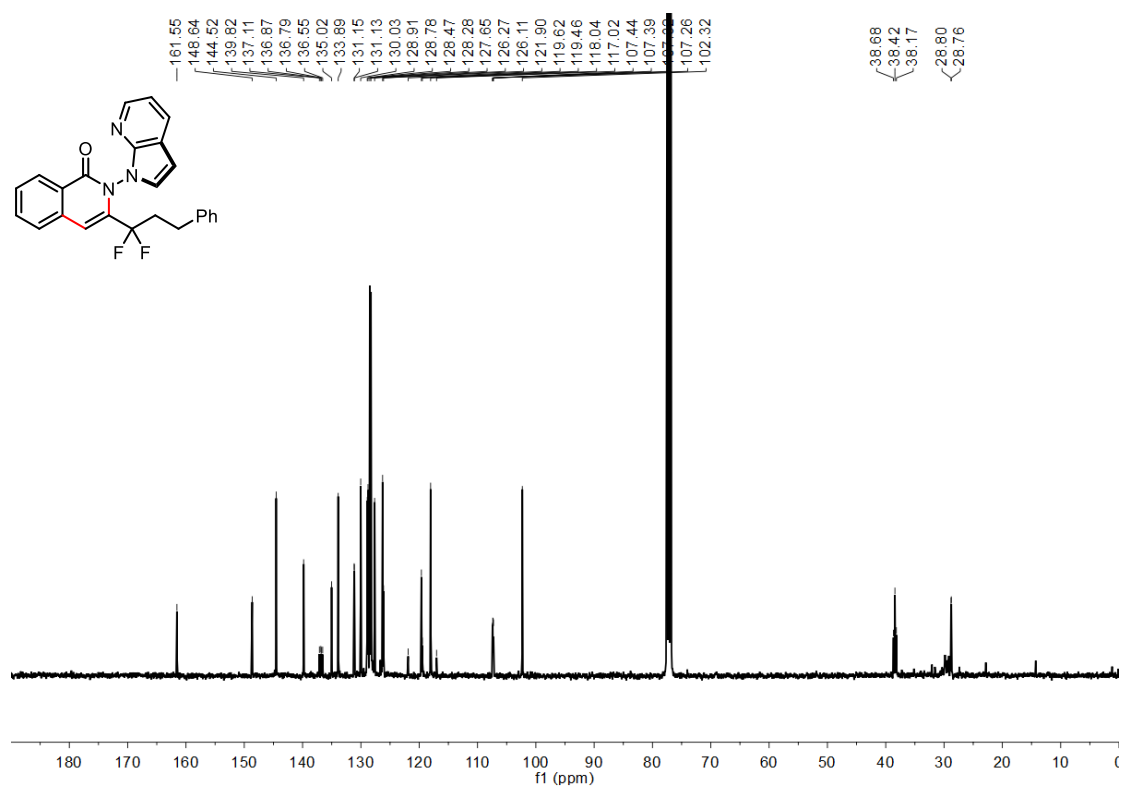

<sup>19</sup>F NMR of **23** (376 MHz, CDCl<sub>3</sub>)

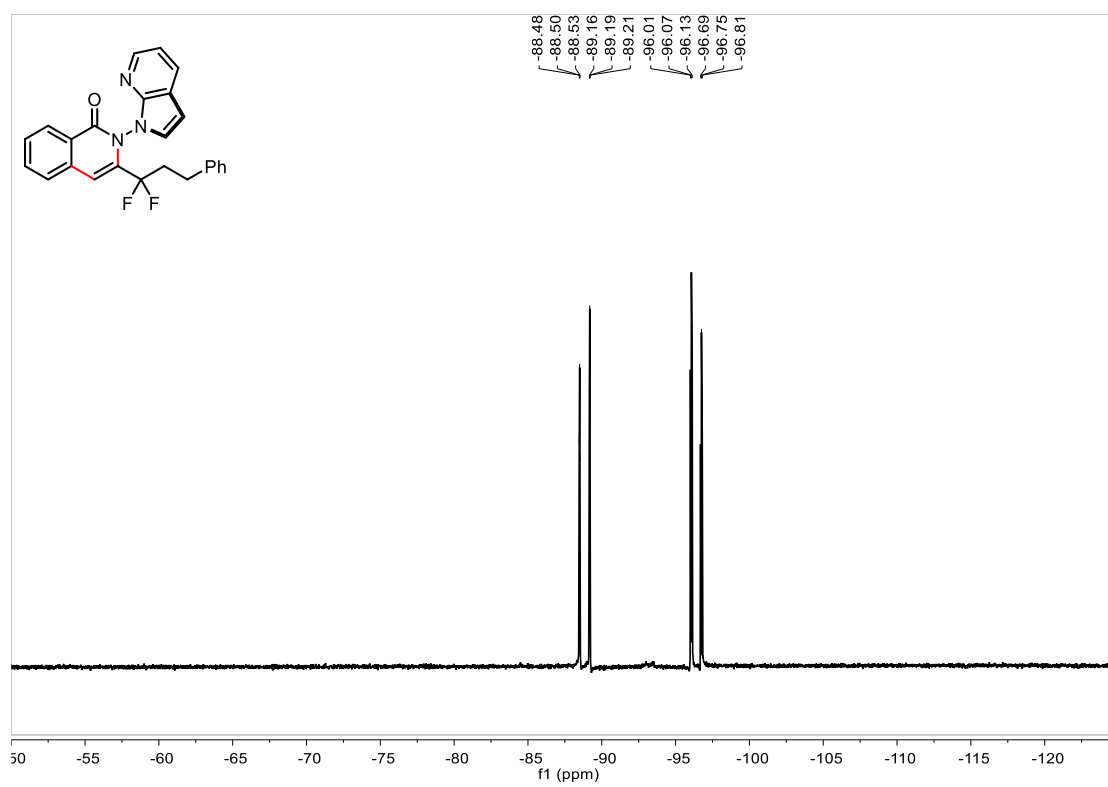

<sup>1</sup>H NMR of **24** (400 MHz, CDCl<sub>3</sub>)

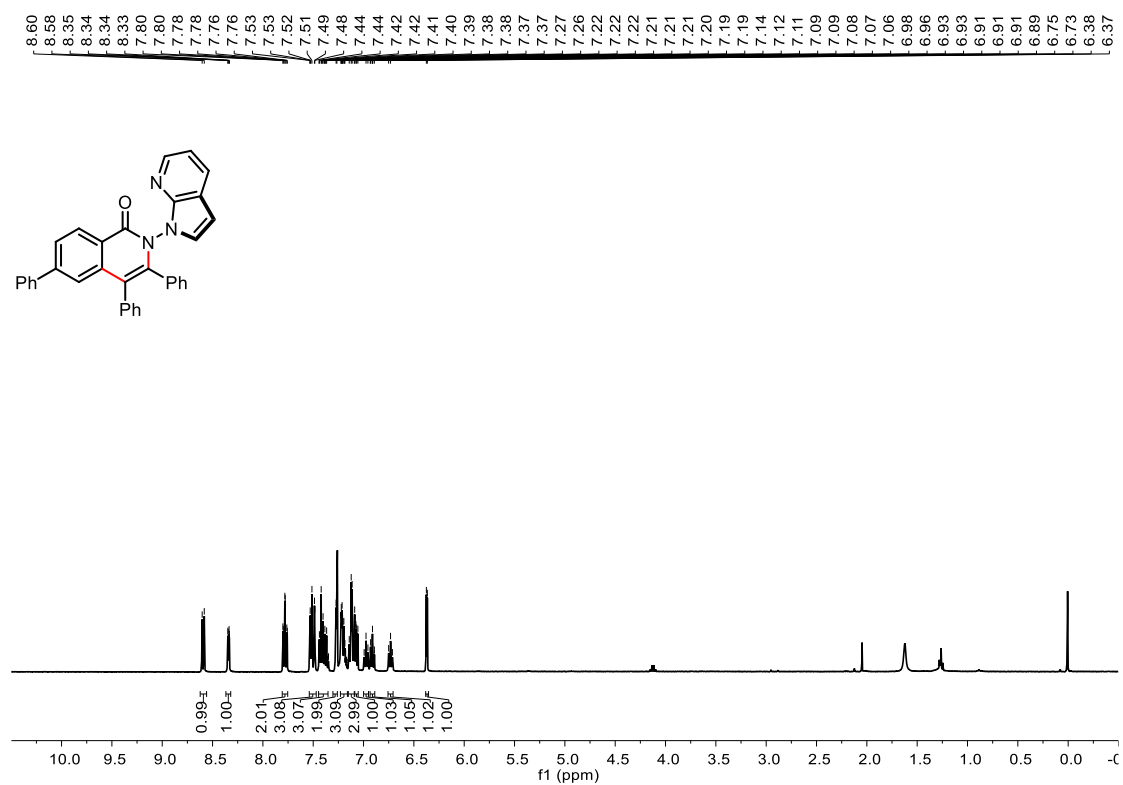

<sup>13</sup>C NMR of **24** (100 MHz, CDCl<sub>3</sub>)

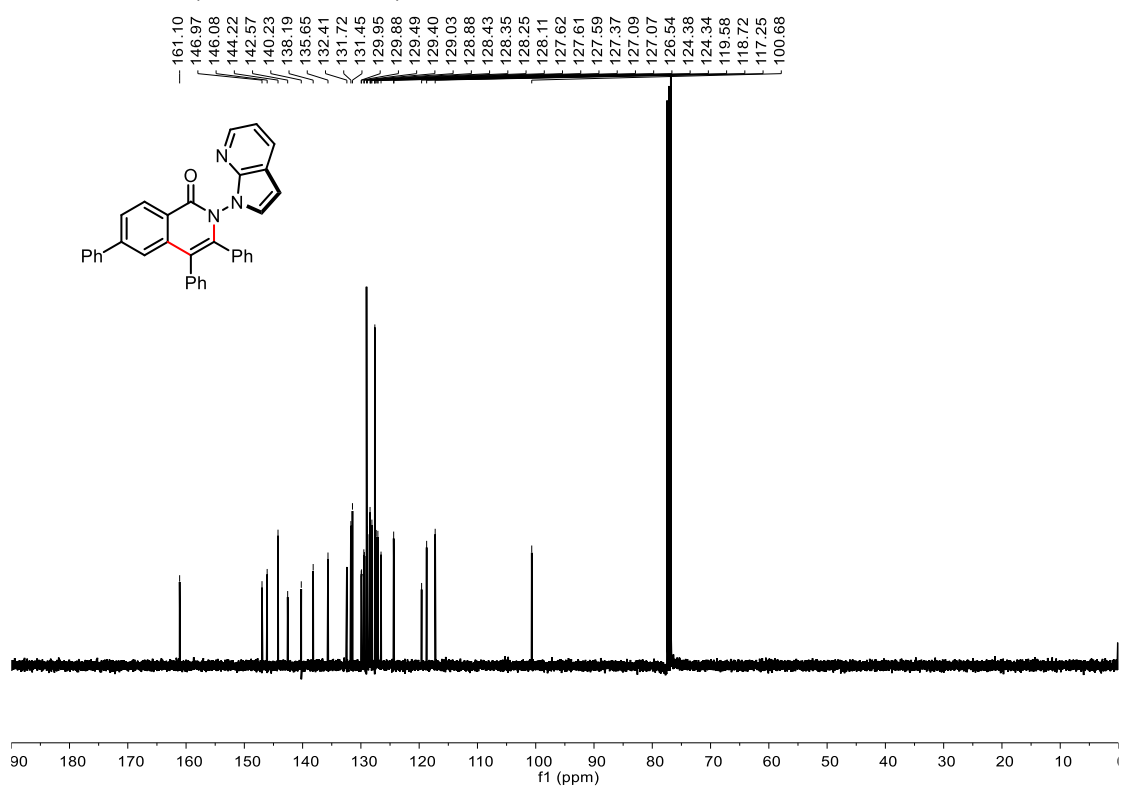

<sup>1</sup>H NMR of **25** (400 MHz, CDCl<sub>3</sub>)

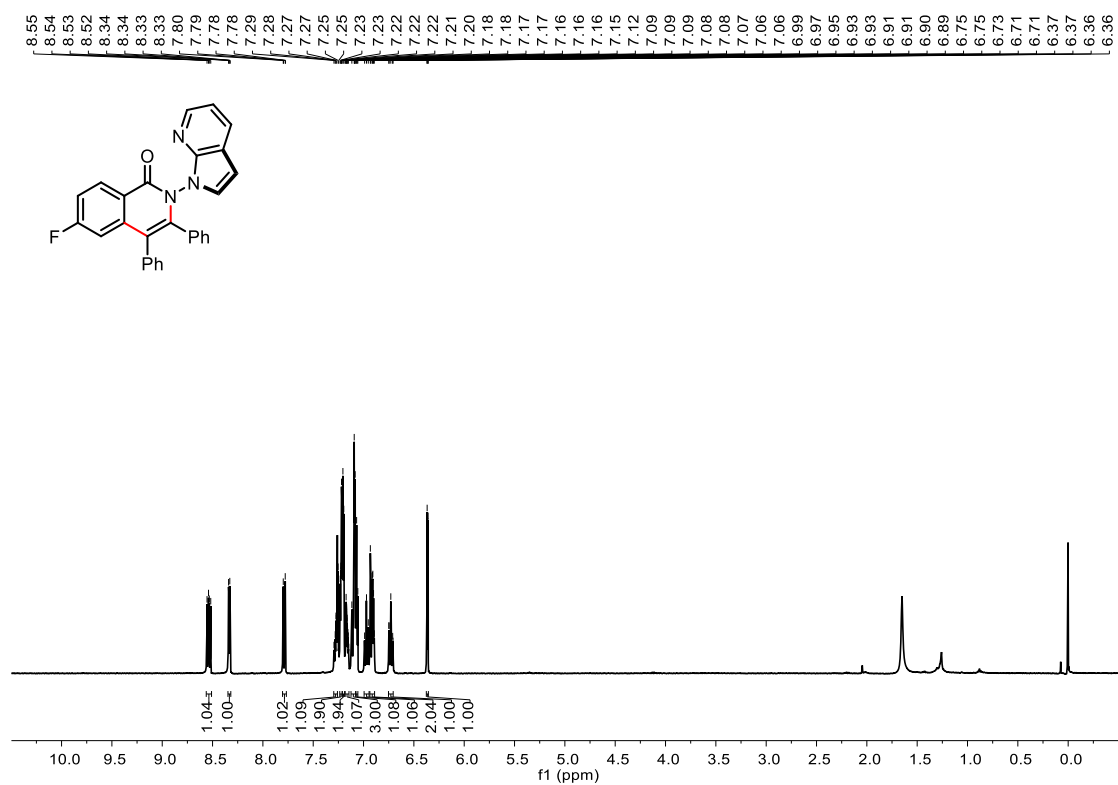

<sup>13</sup>C NMR of **25** (100 MHz, CDCl<sub>3</sub>)

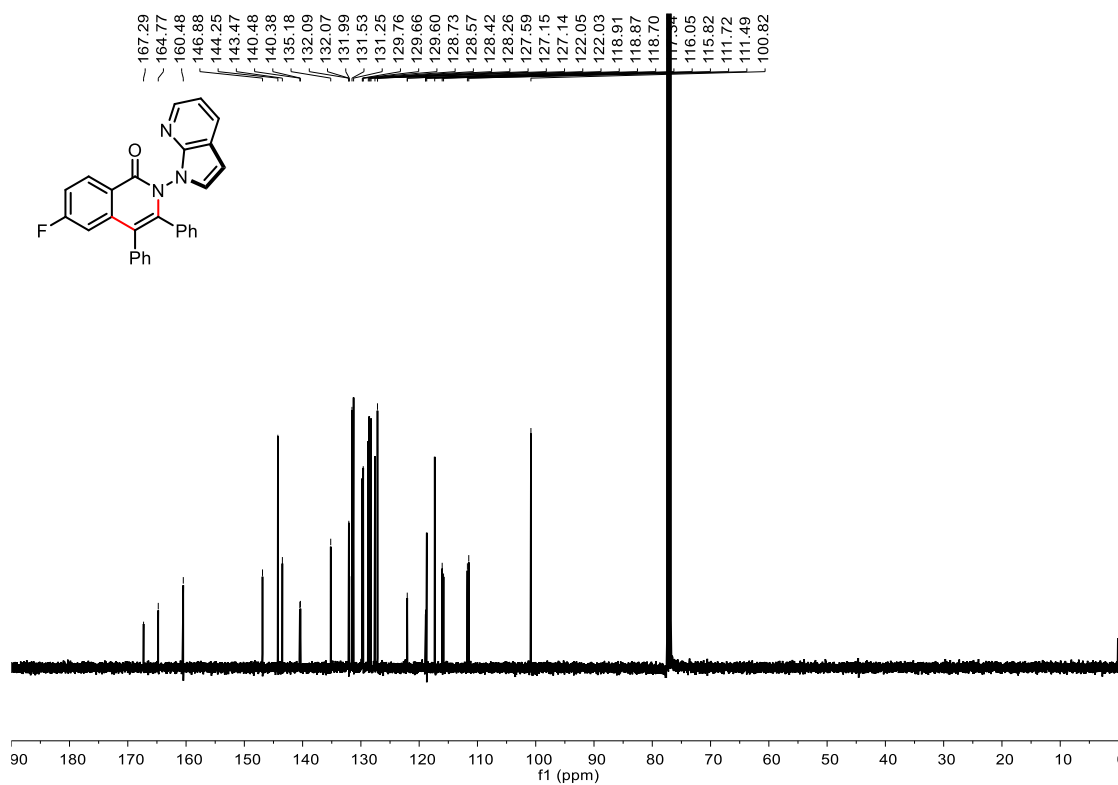

$^{19}\text{F}$  NMR of **25** (376 MHz,  $\text{CDCl}_3$ )

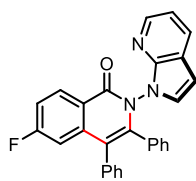

-103.65  
-103.67  
-103.69  
-103.71

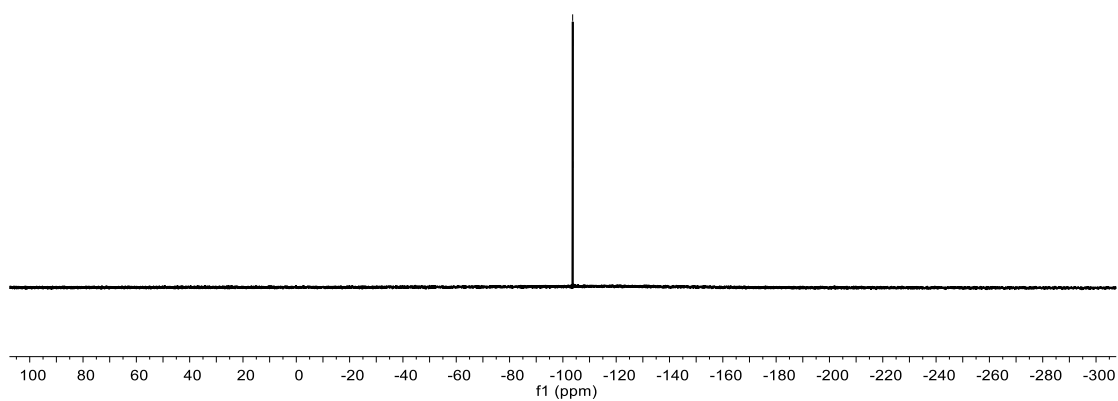

<sup>1</sup>H NMR of **26** (400 MHz, CDCl<sub>3</sub>)

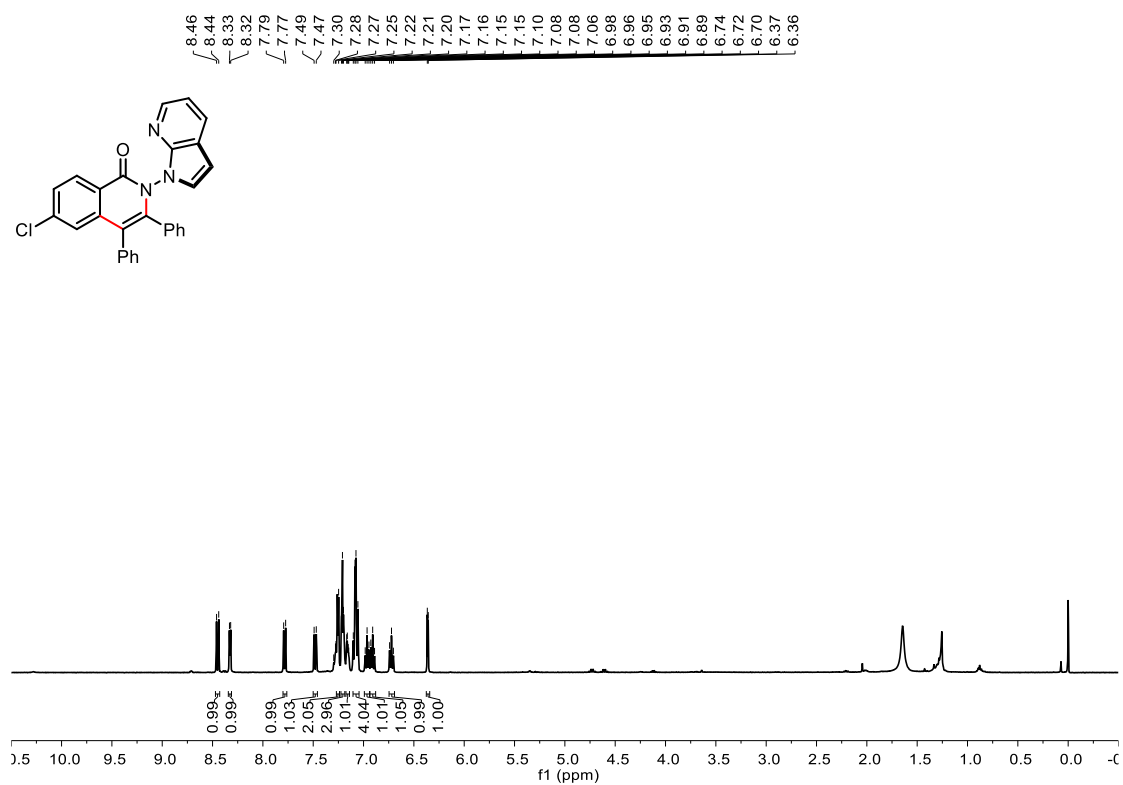

<sup>13</sup>C NMR of **26** (100 MHz, CDCl<sub>3</sub>)

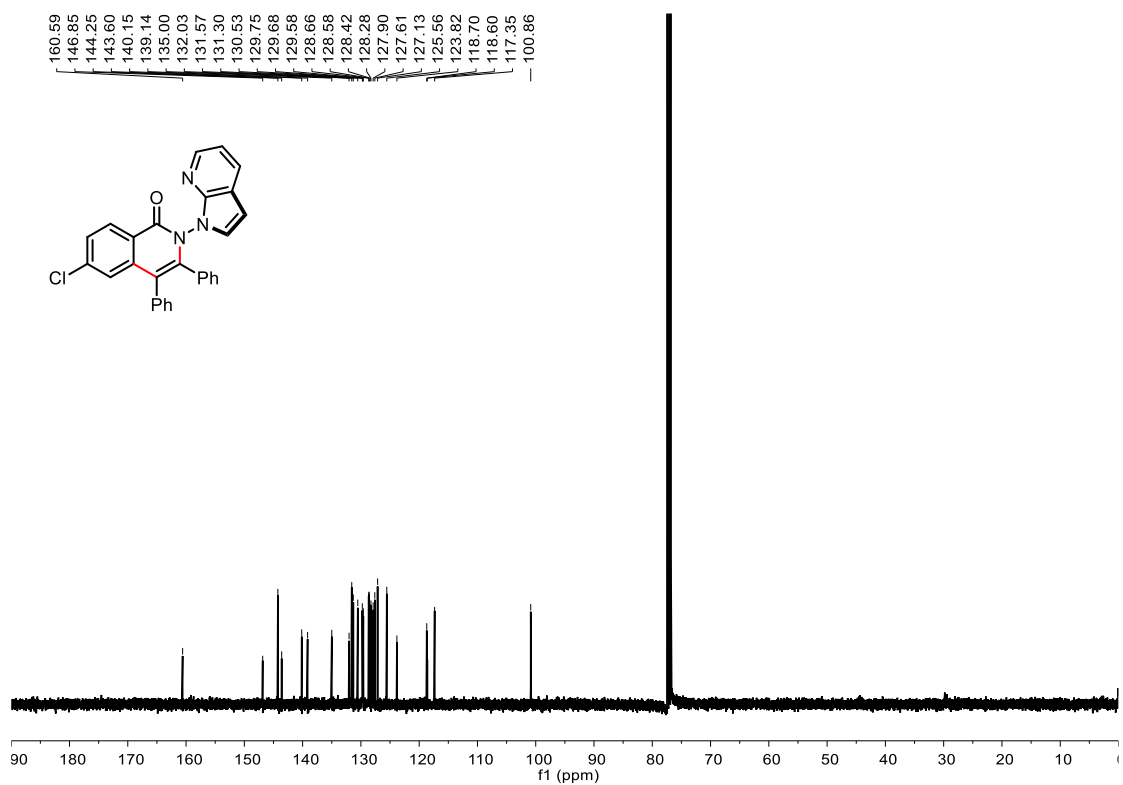

<sup>1</sup>H NMR of **27** (400 MHz, CDCl<sub>3</sub>)

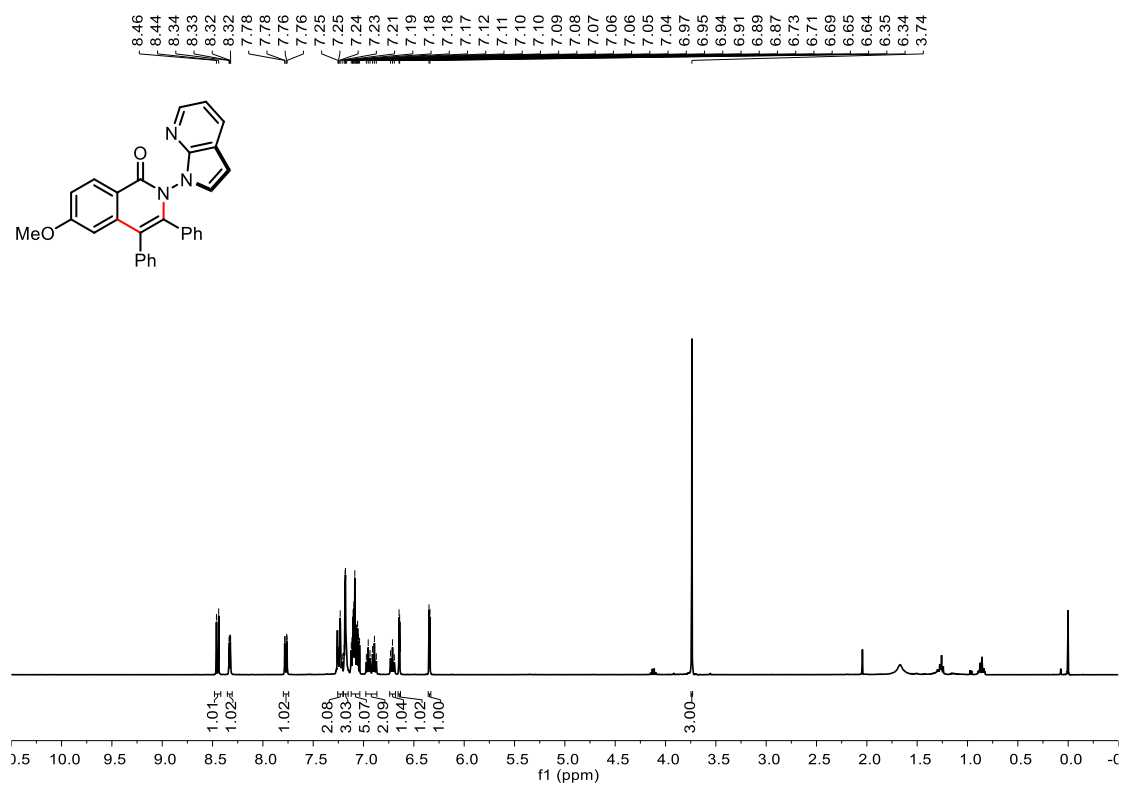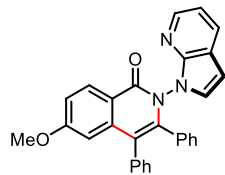

<sup>13</sup>C NMR of **27** (100 MHz, CDCl<sub>3</sub>)

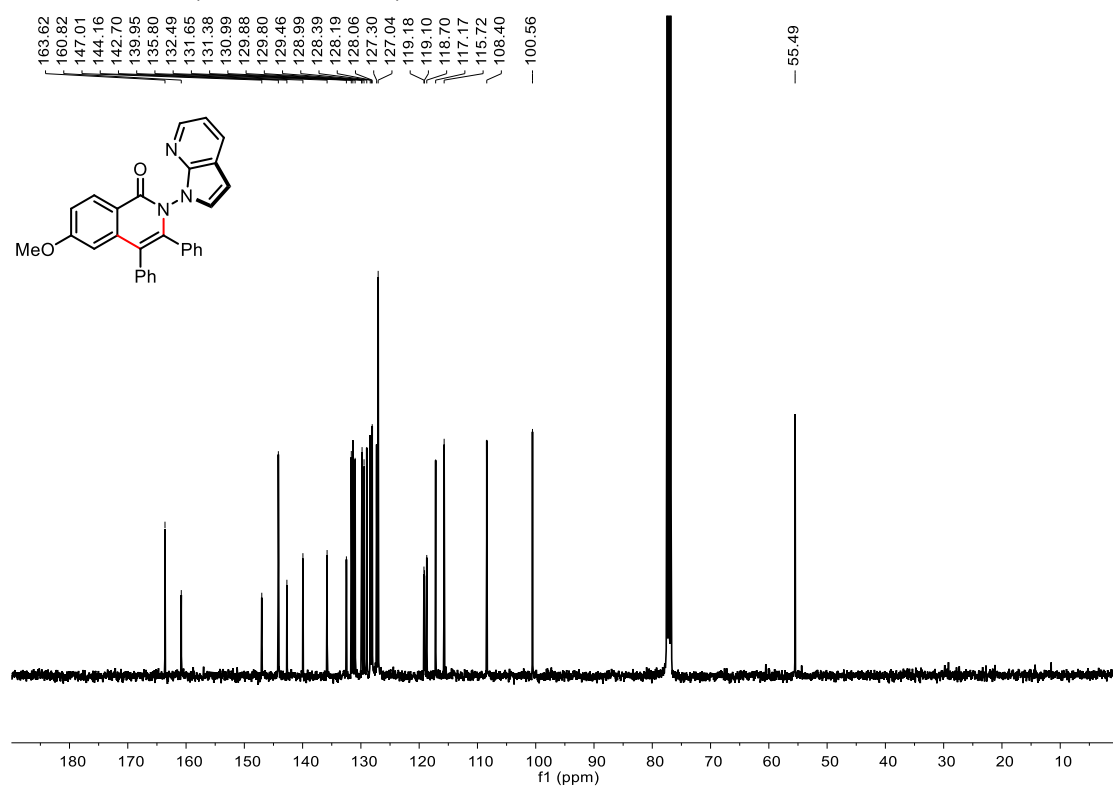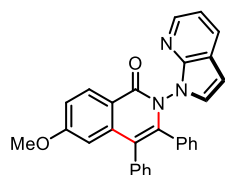

<sup>1</sup>H NMR of **28** (400 MHz, CDCl<sub>3</sub>)

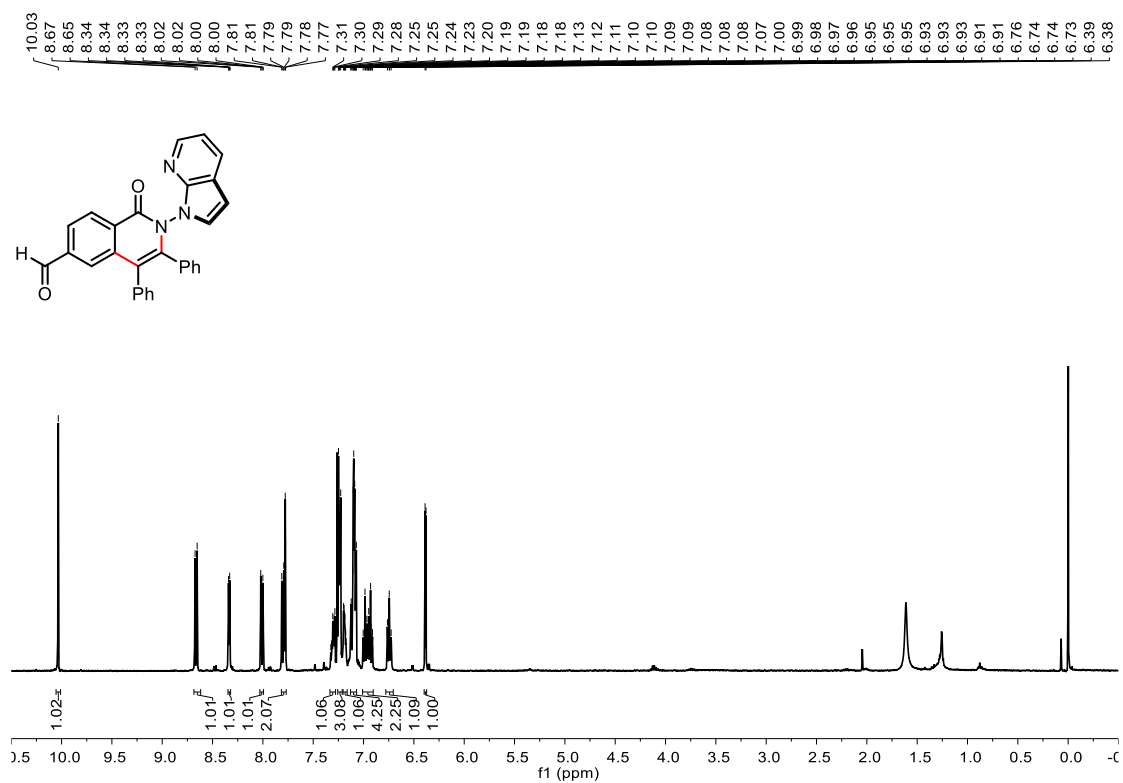

<sup>13</sup>C NMR of **28** (100 MHz, CDCl<sub>3</sub>)

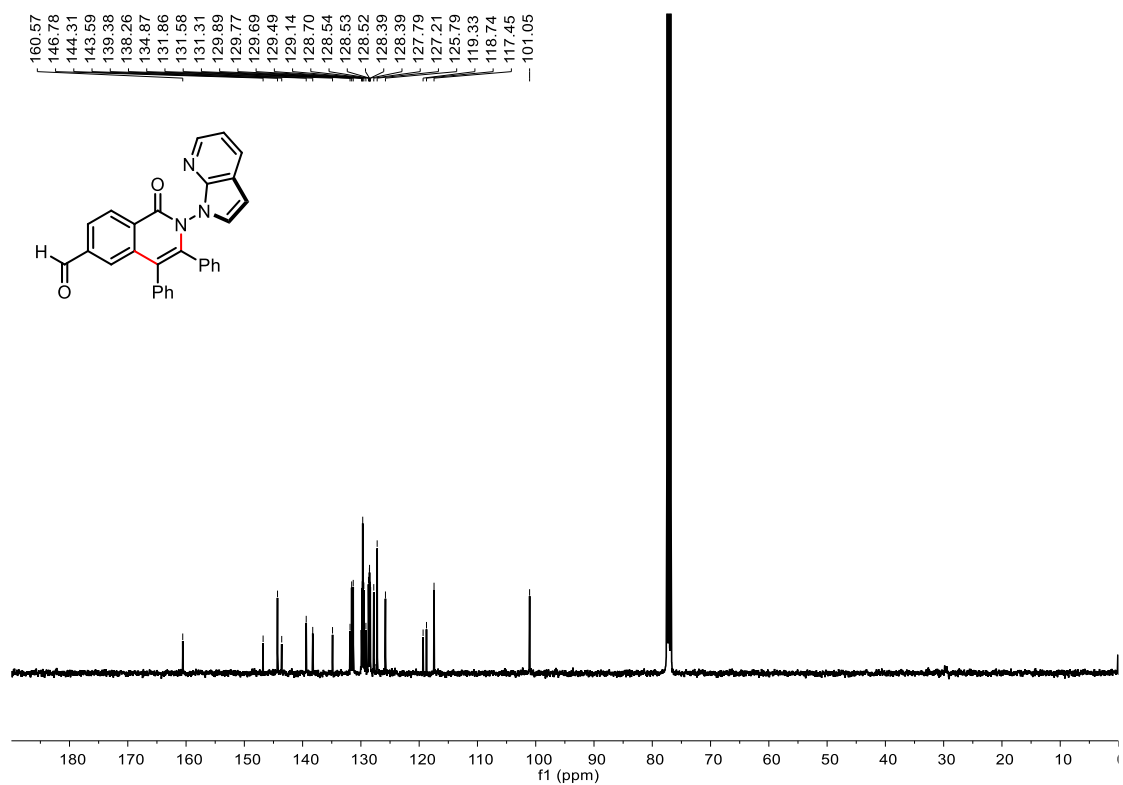



<sup>1</sup>H NMR of **29** (400 MHz, CDCl<sub>3</sub>)

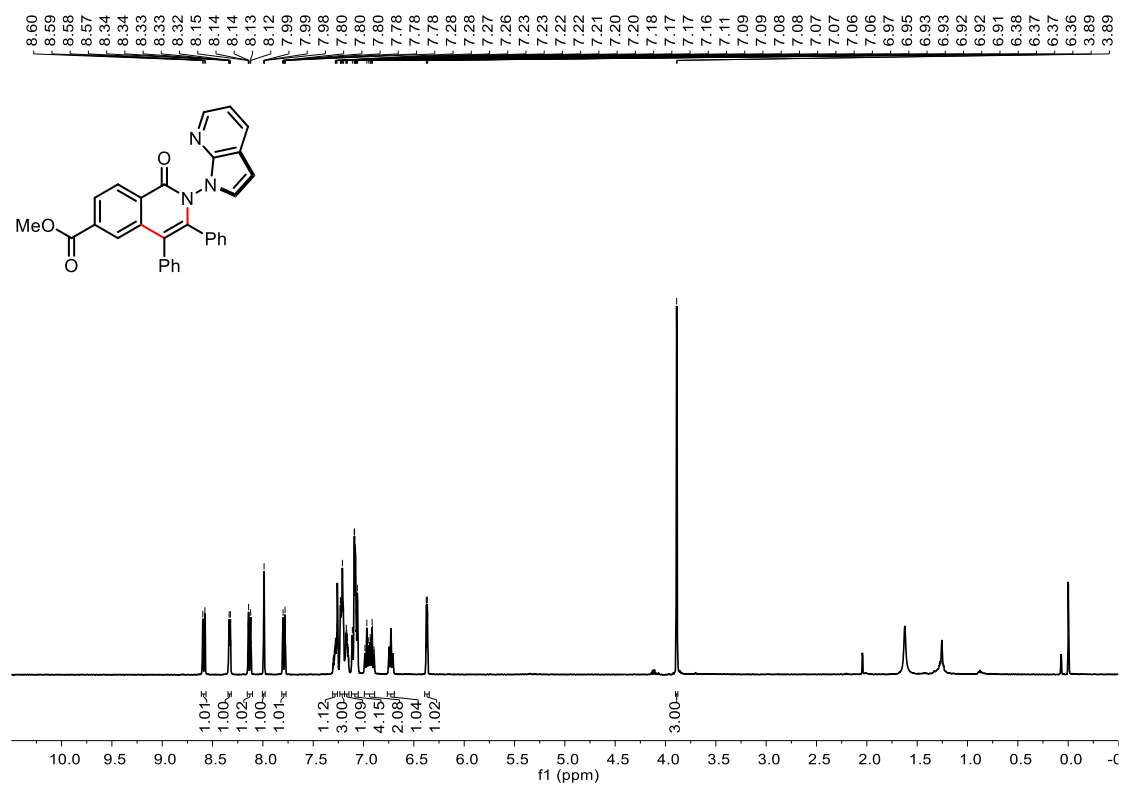

<sup>13</sup>C NMR of **29** (100 MHz, CDCl<sub>3</sub>)

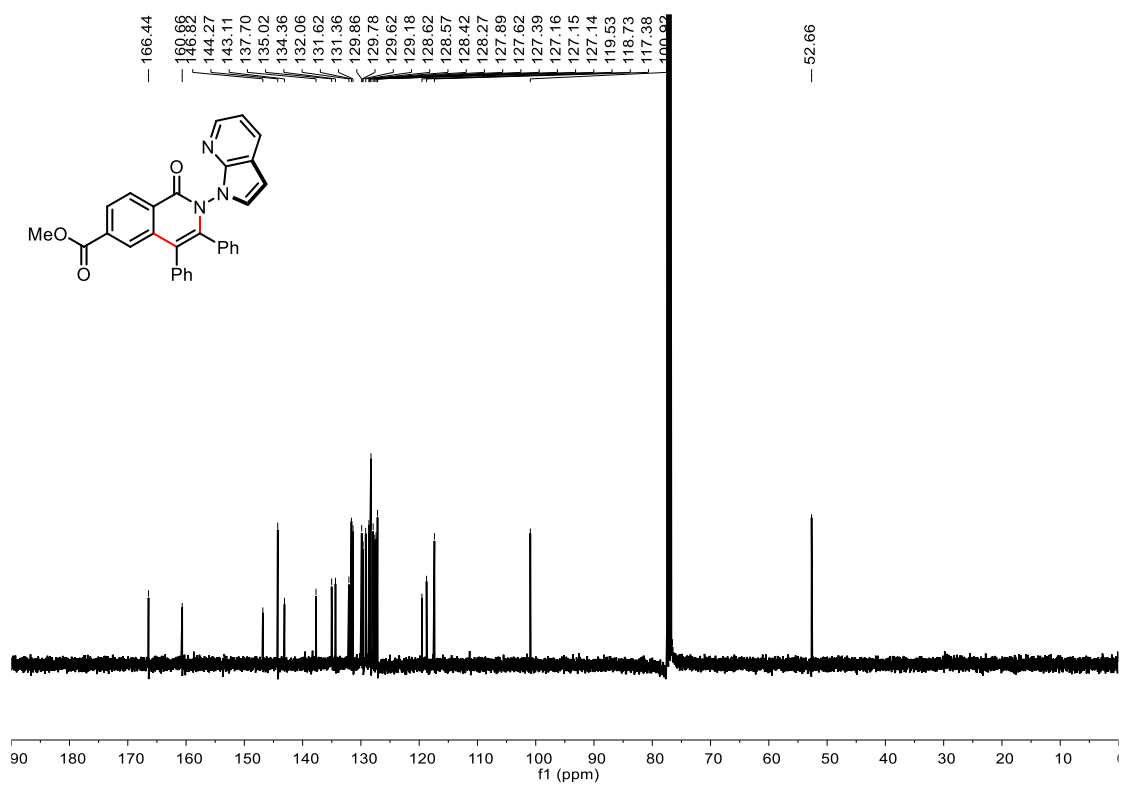

<sup>1</sup>H NMR of **30** (400 MHz, CDCl<sub>3</sub>)

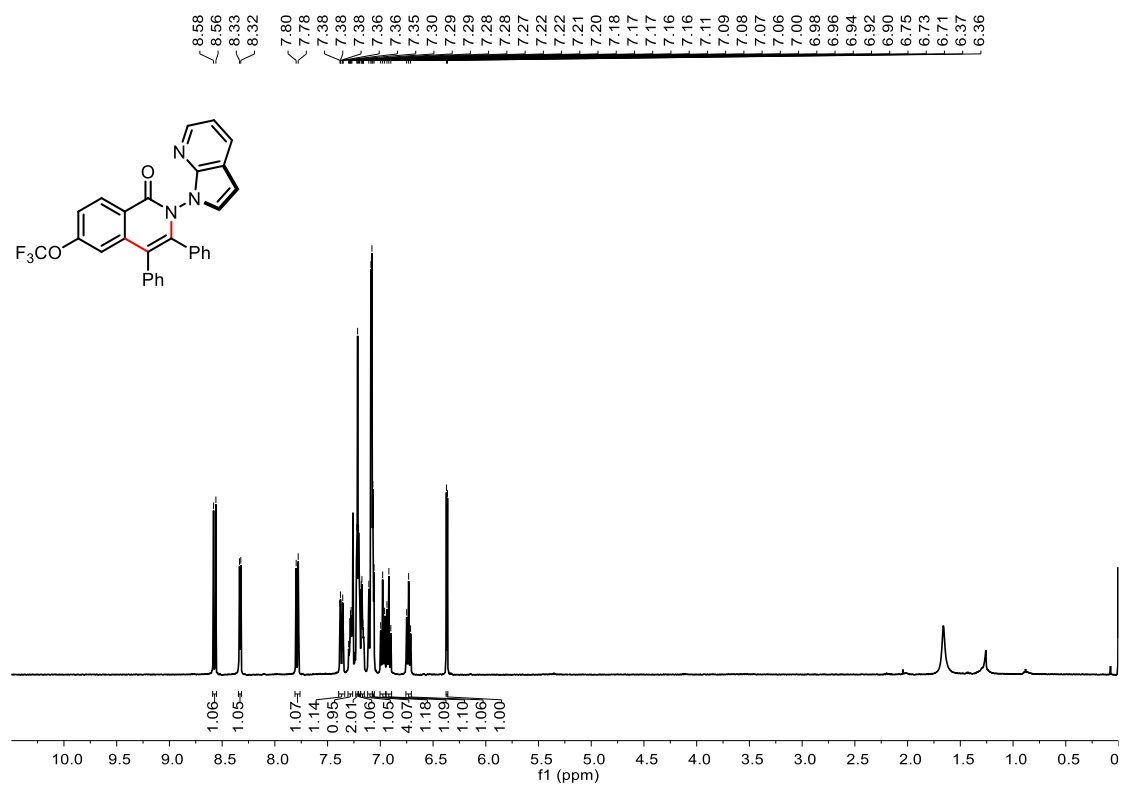

<sup>13</sup>C NMR of **30** (100 MHz, CDCl<sub>3</sub>)

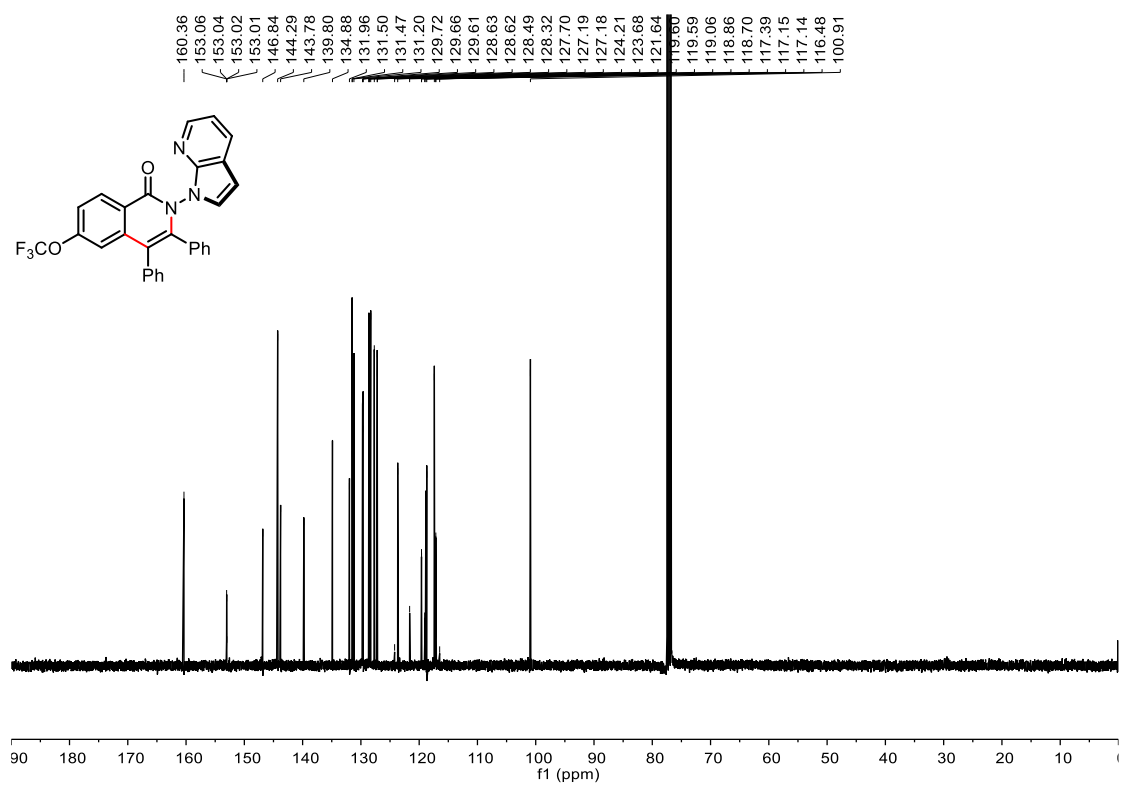

$^{19}\text{F}$  NMR of **30** (376 MHz,  $\text{CDCl}_3$ )

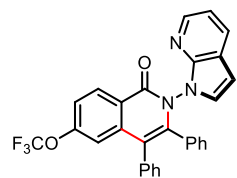

-57.31

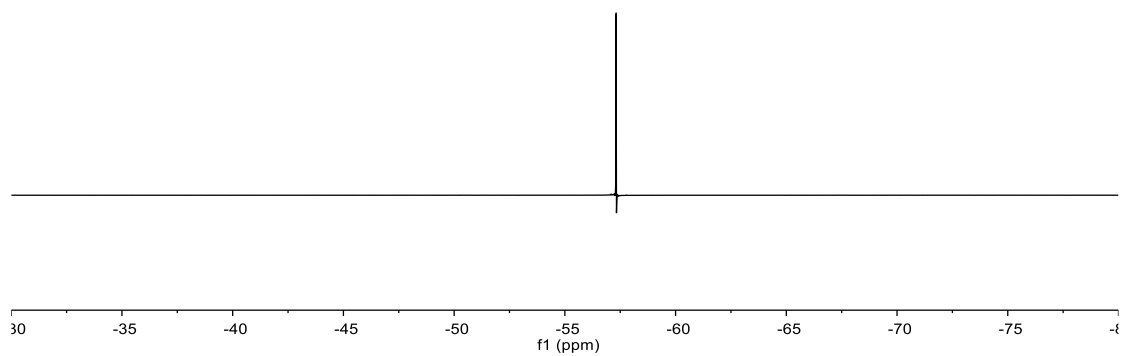

<sup>1</sup>H NMR of **31** (400 MHz, CDCl<sub>3</sub>)

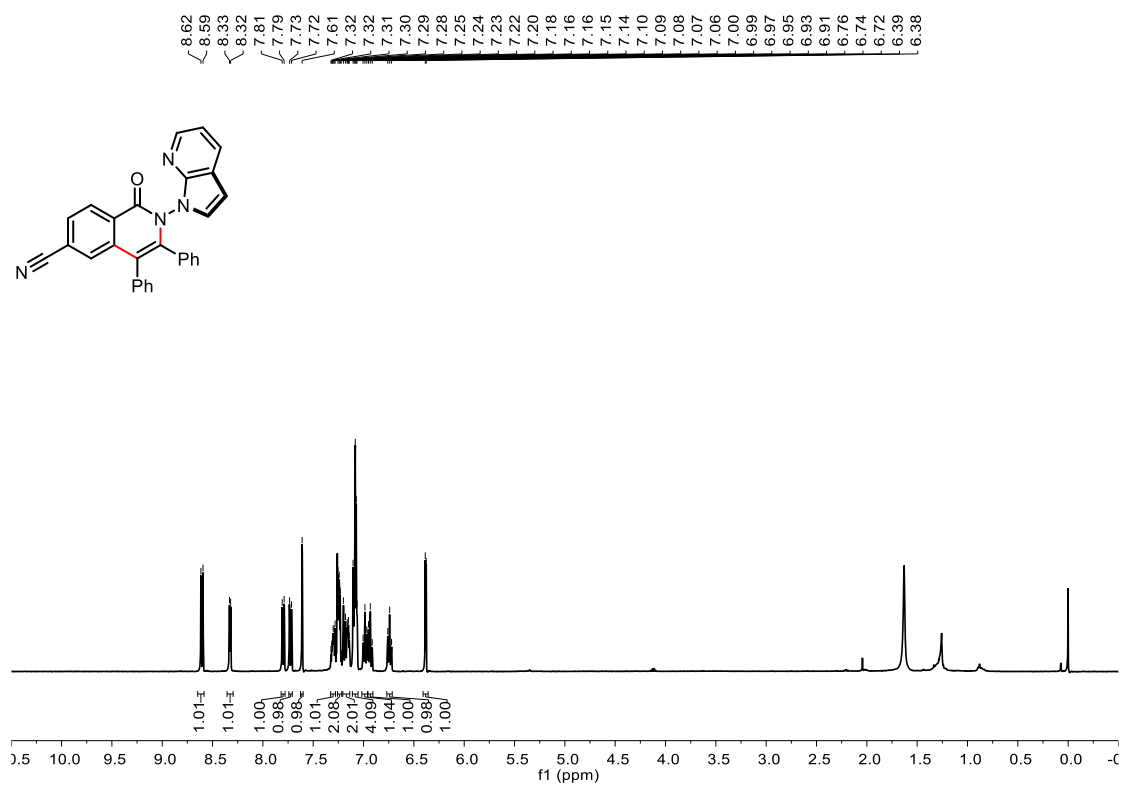

<sup>13</sup>C NMR of **31** (100 MHz, CDCl<sub>3</sub>)

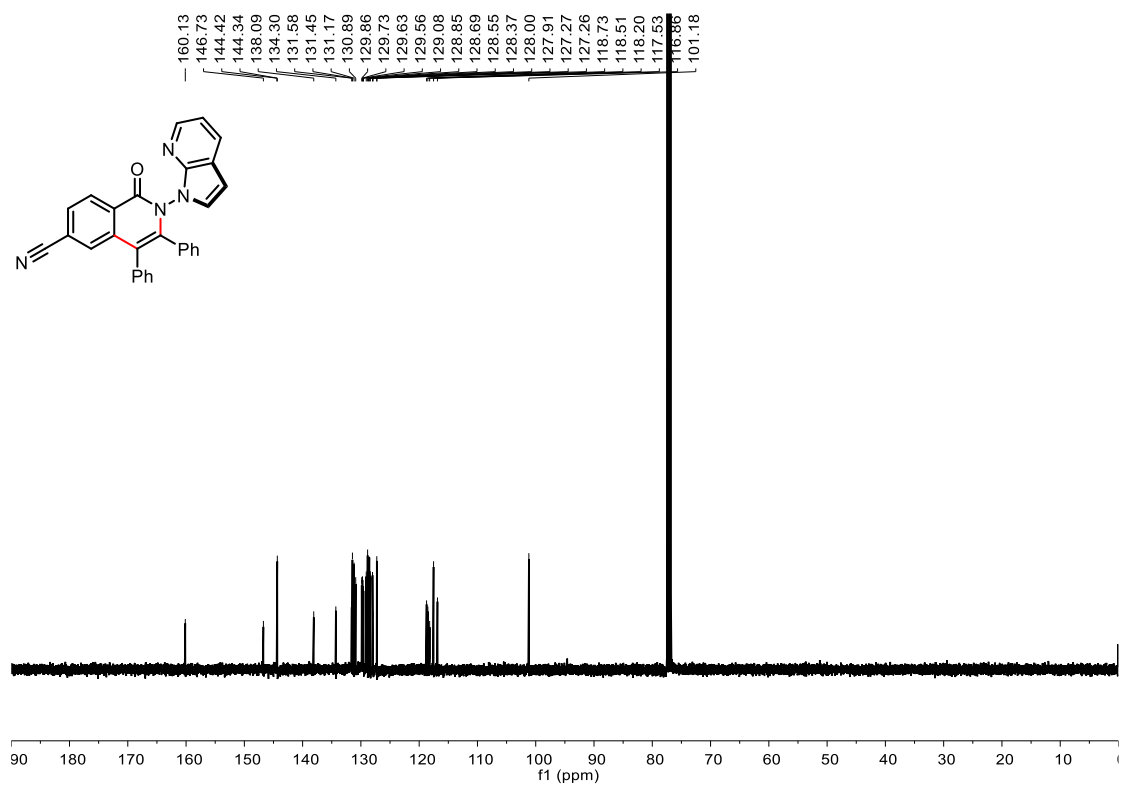

<sup>1</sup>H NMR of **32** (400 MHz, CDCl<sub>3</sub>)

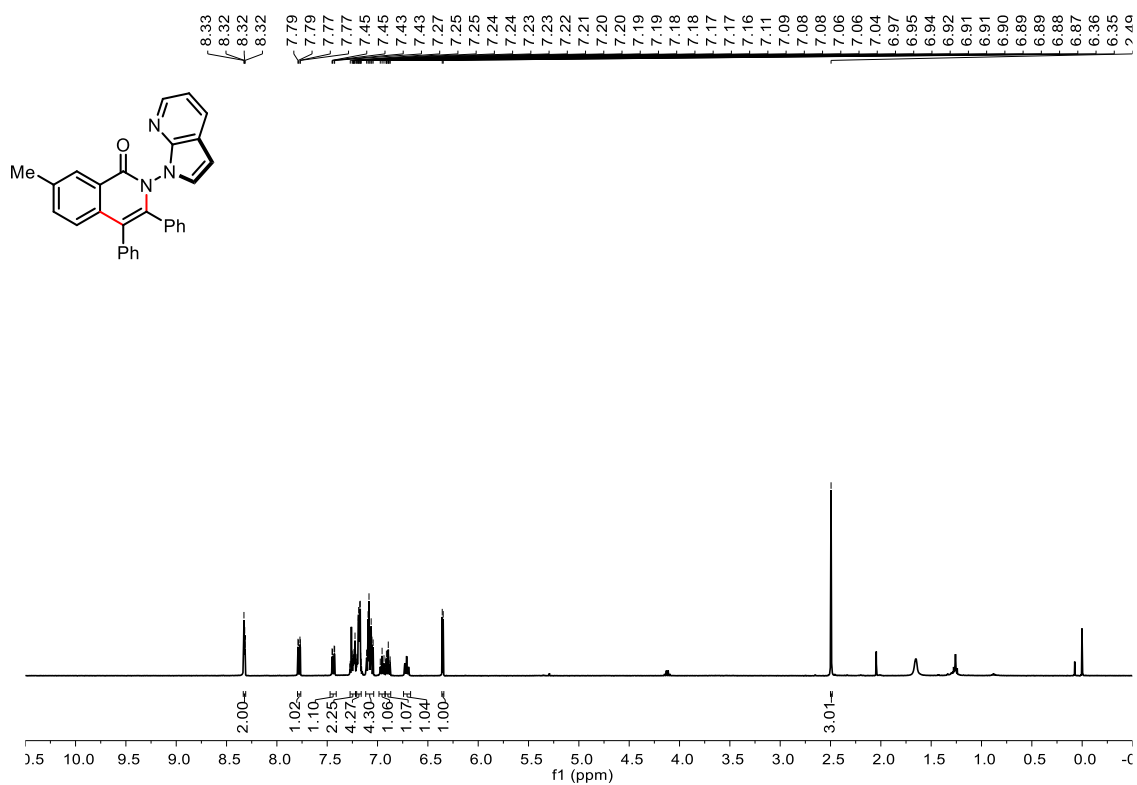

<sup>13</sup>C NMR of **32** (100 MHz, CDCl<sub>3</sub>)

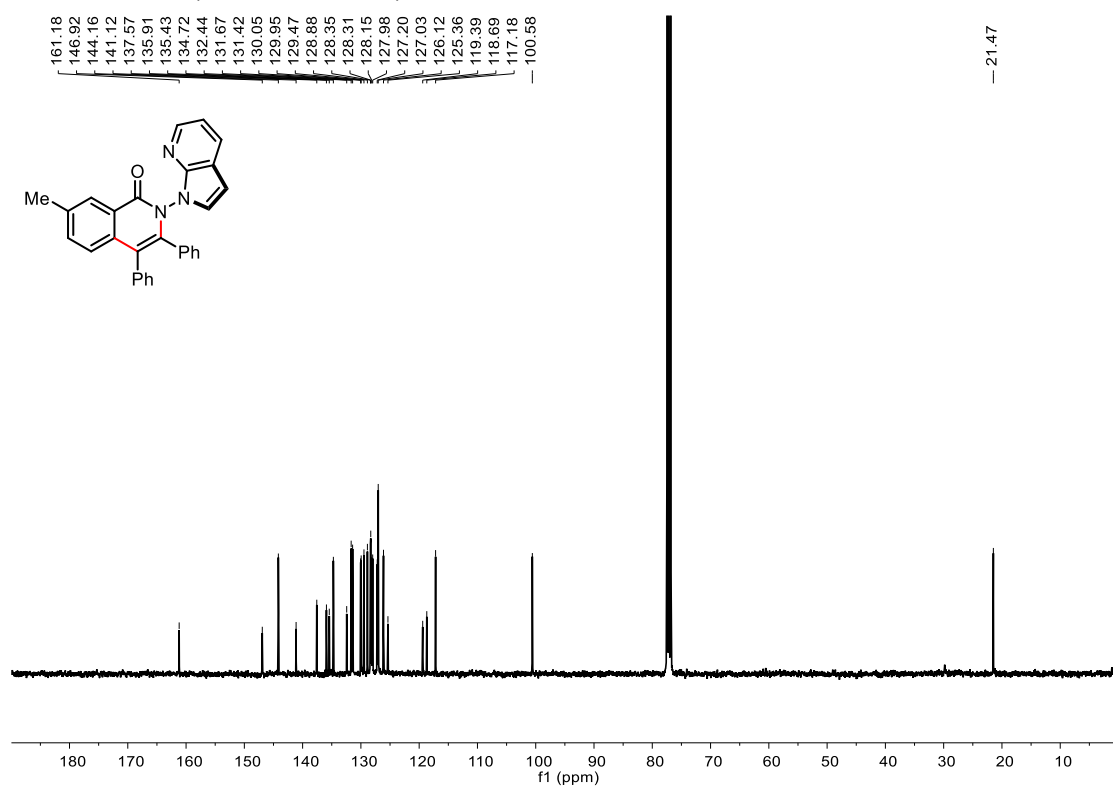

<sup>1</sup>H NMR of **33** (400 MHz, CDCl<sub>3</sub>)

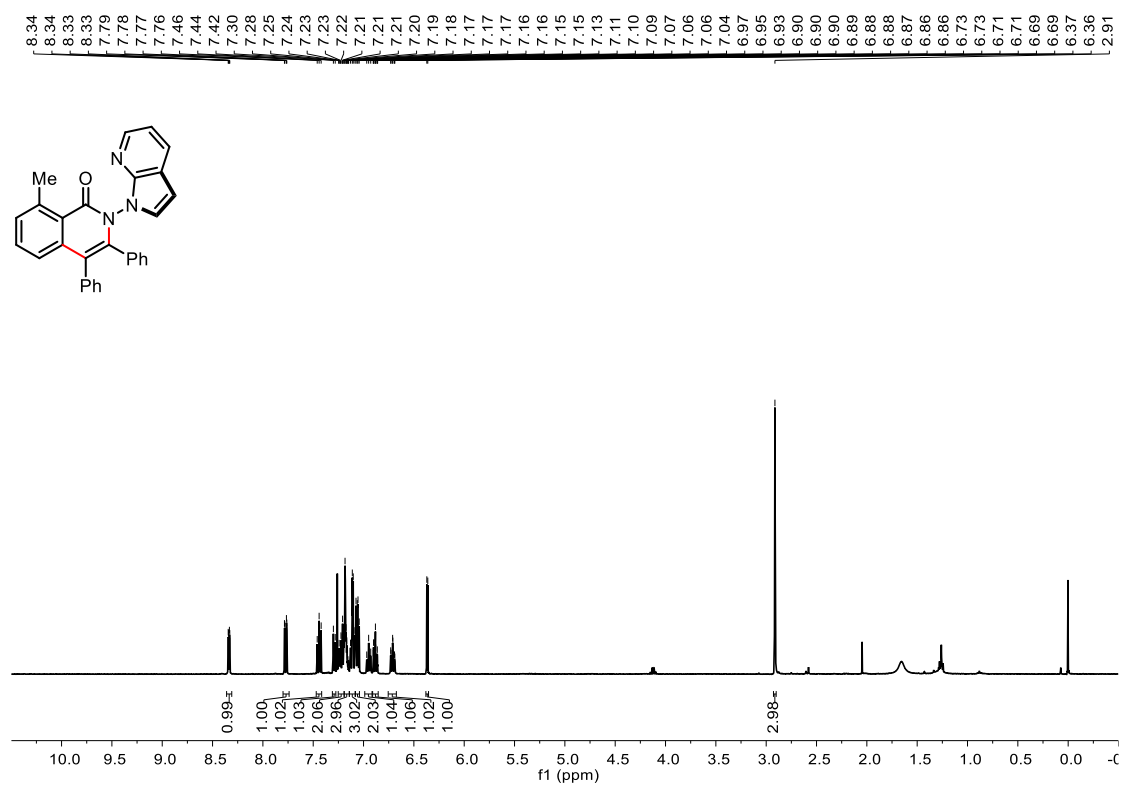

<sup>13</sup>C NMR of **33** (100 MHz, CDCl<sub>3</sub>)

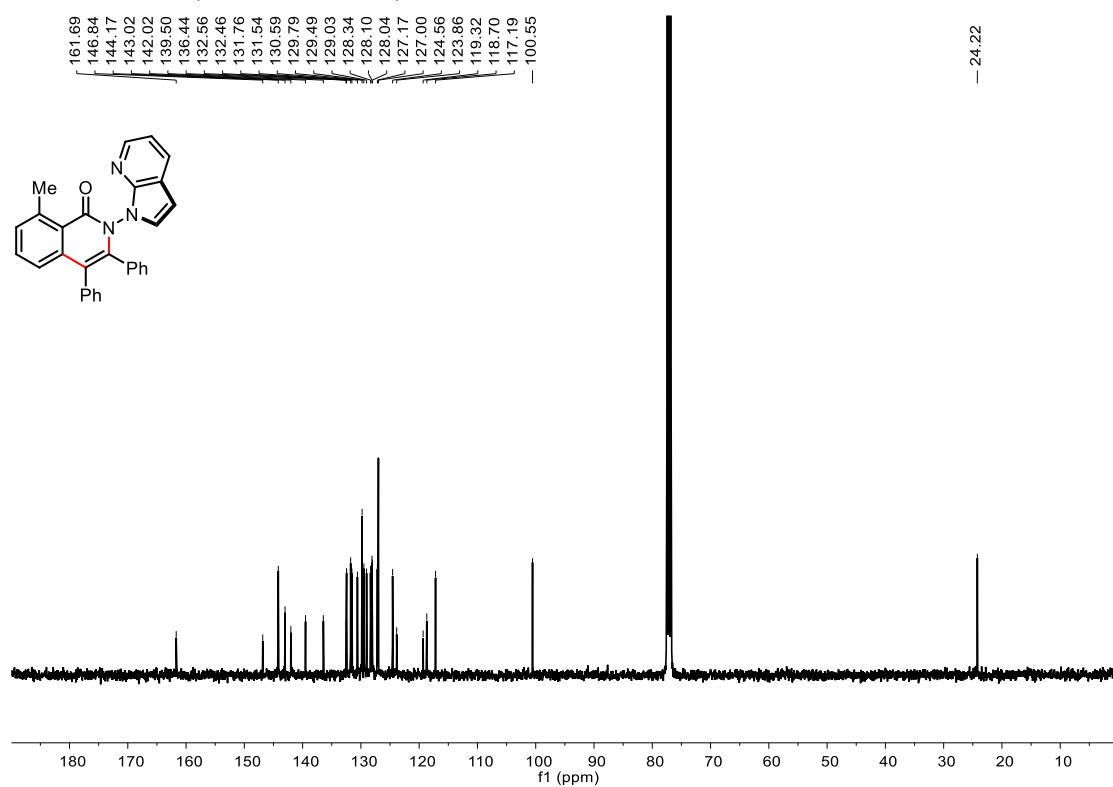

<sup>1</sup>H NMR of **34** (400 MHz, CDCl<sub>3</sub>)

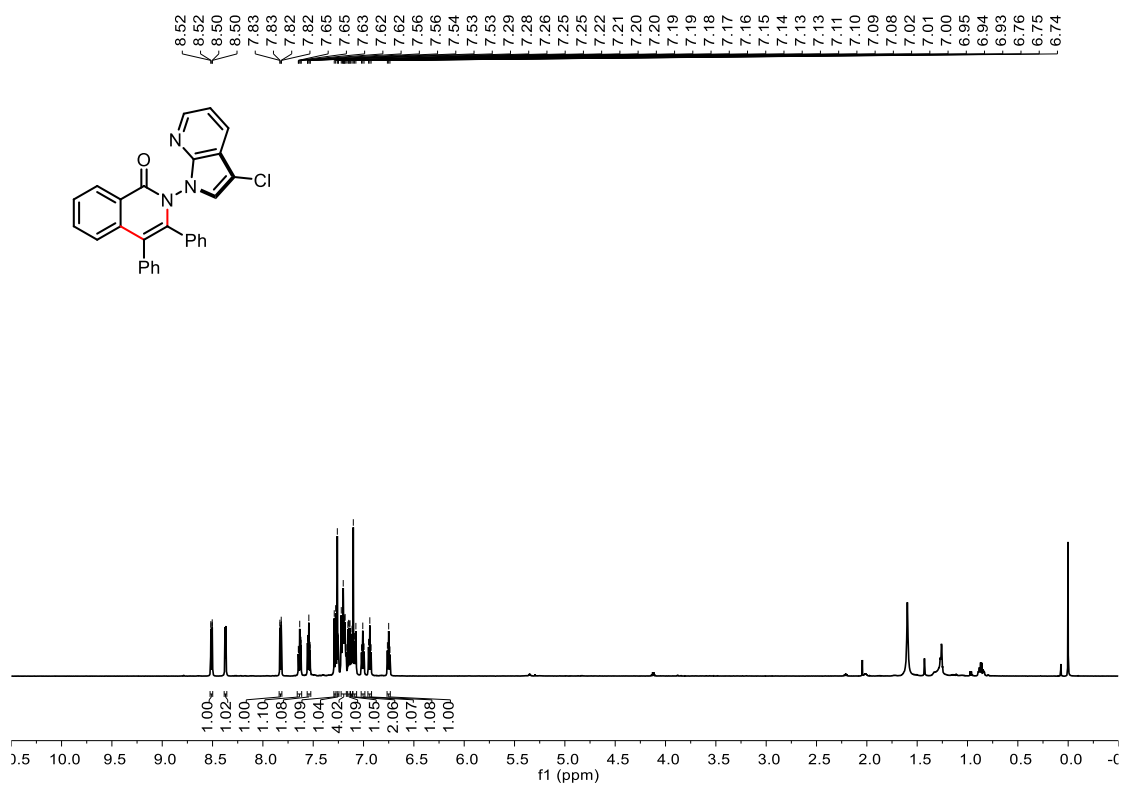

<sup>13</sup>C NMR of **34** (100 MHz, CDCl<sub>3</sub>)

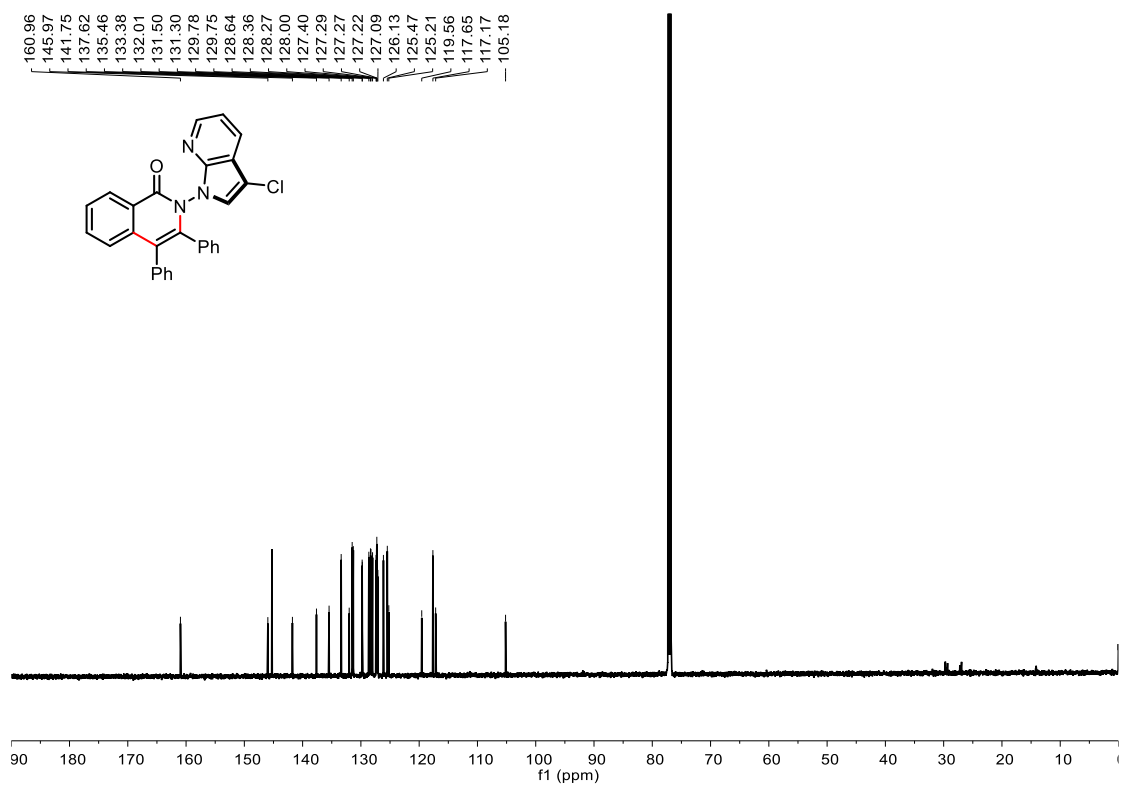

<sup>1</sup>H NMR of **35** (400 MHz, CDCl<sub>3</sub>)

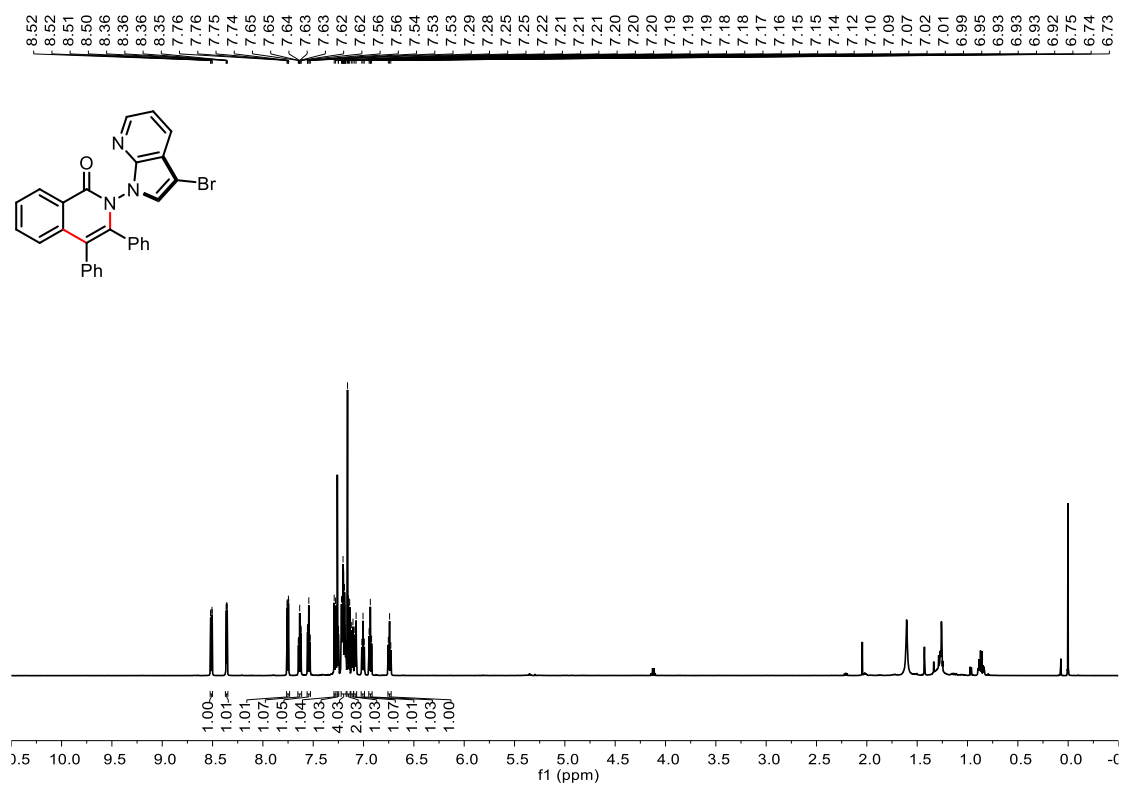

<sup>13</sup>C NMR of **35** (100 MHz, CDCl<sub>3</sub>)

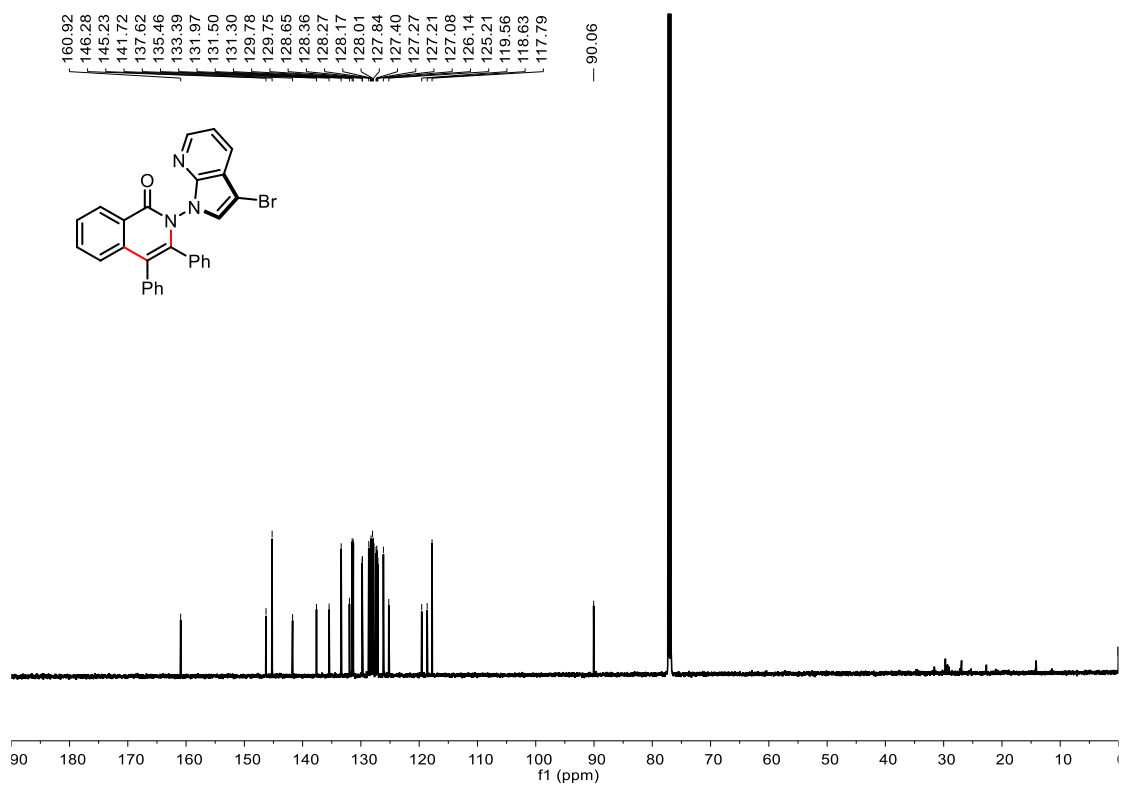



<sup>1</sup>H NMR of **36** (400 MHz, CDCl<sub>3</sub>)

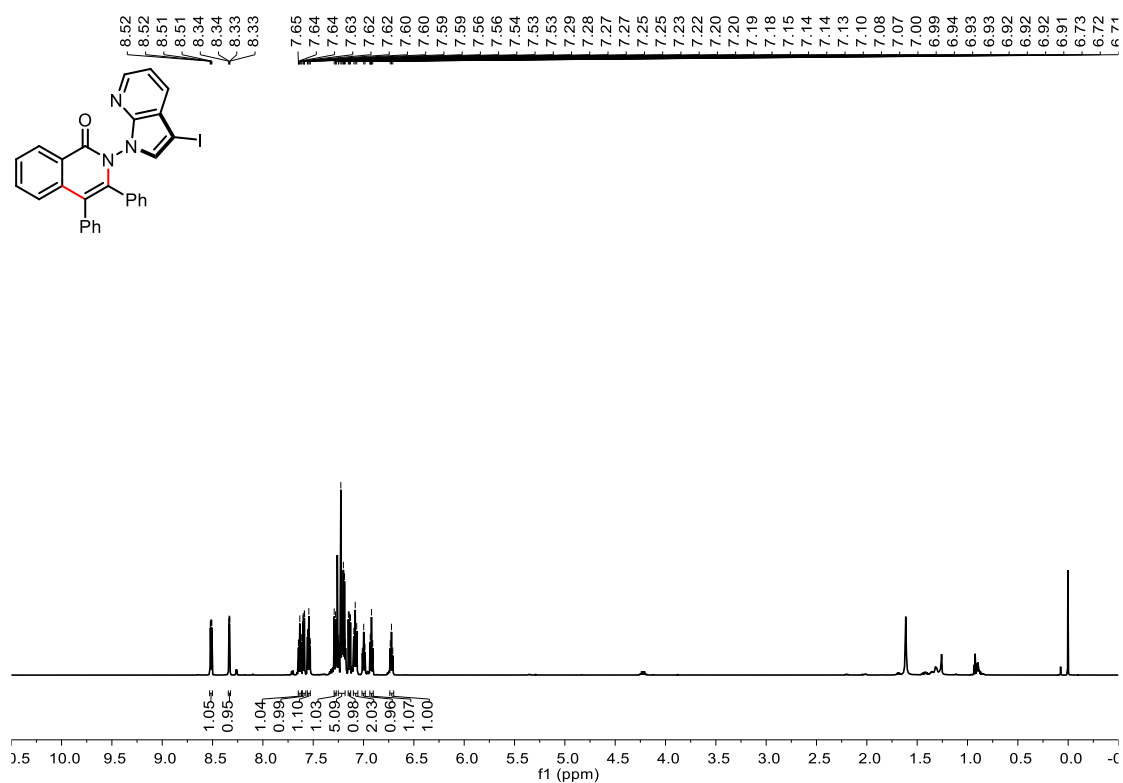

<sup>13</sup>C NMR of **36** (100 MHz, CDCl<sub>3</sub>)

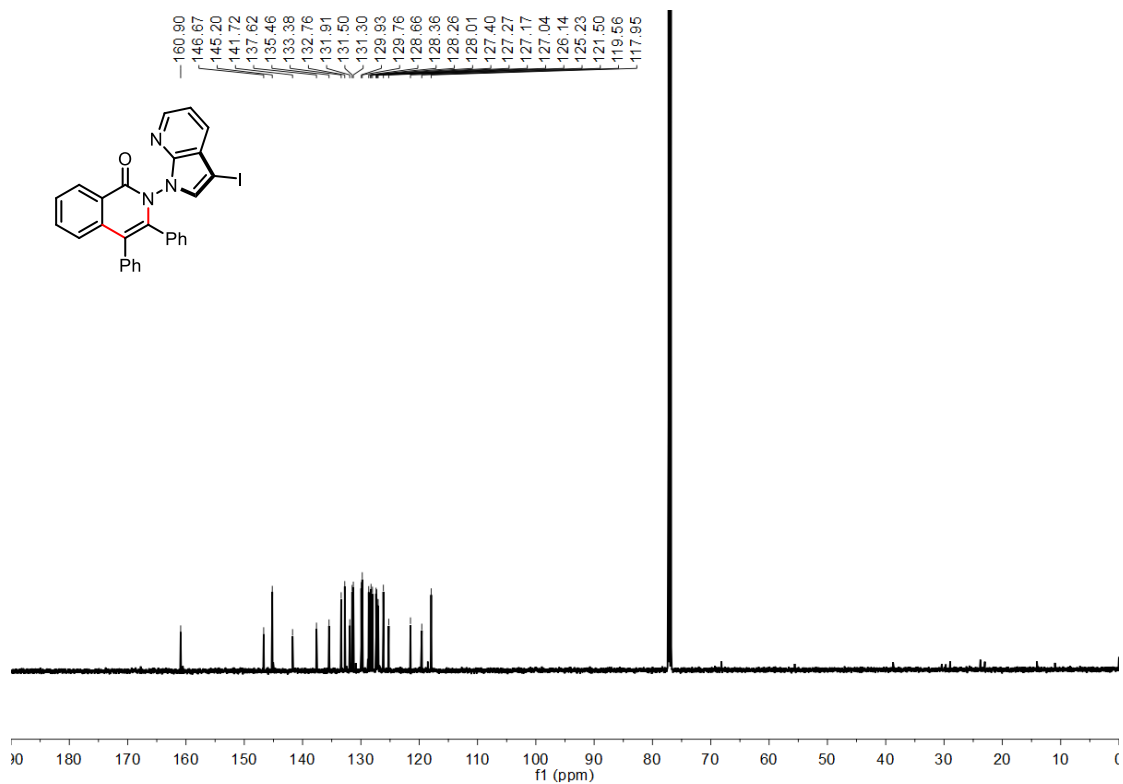

<sup>1</sup>H NMR of **37** (400 MHz, CDCl<sub>3</sub>)

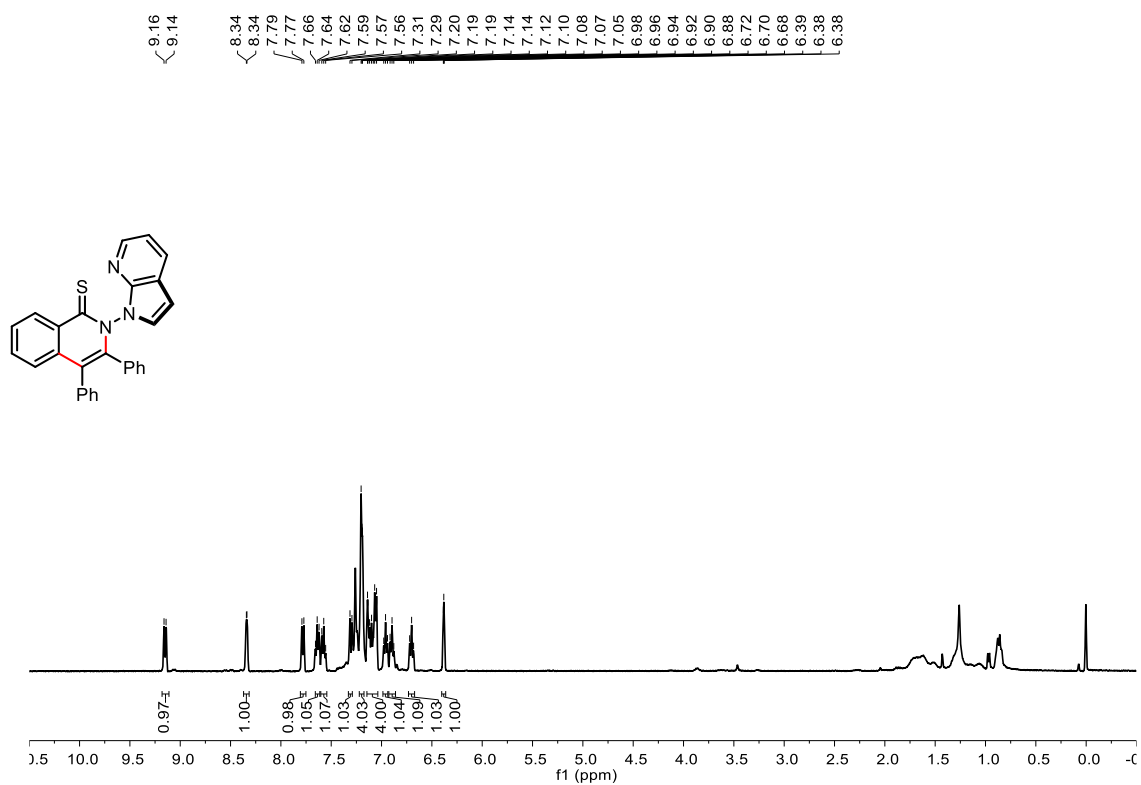

<sup>13</sup>C NMR of **37** (100 MHz, CDCl<sub>3</sub>)

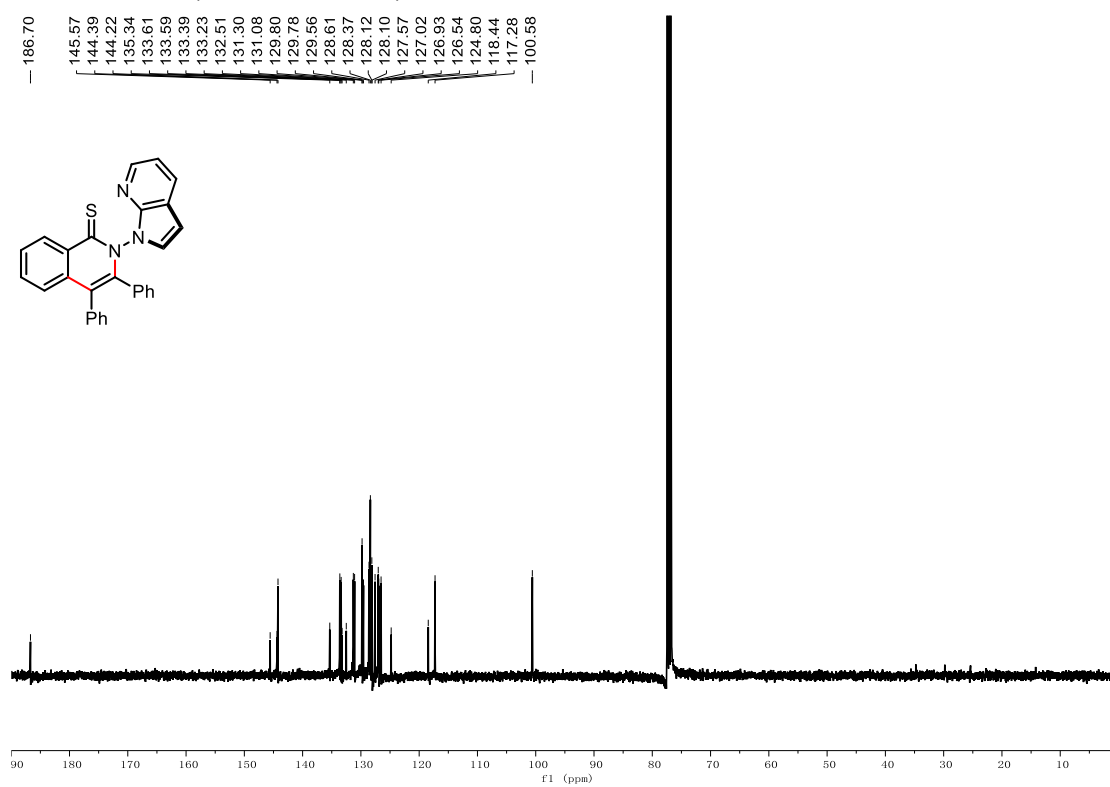

## 9. References

- 1 P. S. Sagara, P. F. Siril and P. C. Ravikumar, *J. Org. Chem.*, 2019, **84**, 12314–12323.
- 2 P. Zhang, Q. Xu, X.-M. Wang, J. Feng, C.-J. Lu, Y. Li and R.-R. Liu, *Angew. Chem. Int. Ed.*, 2022, **61**, e202212101.
- 3 Q.-J. Yao, F.-R. Huang, J.-H. Chen, M.-Y. Zhong and B. Shi, *Angew. Chem. Int. Ed.*, 2023, **62**, e202218533.
- 4 W. Chen, H. Xu, F. Liu, K. Chen, Z. Zhou and W. Yi, *Angew. Chem. Int. Ed.*, 2024, **63**, e202401498.
- 5 X. Zhu, H. Wu, Y. Wang, G. Huang, F. Wang and X. Li, *Chem. Sci.*, 2023, **14**, 8564–8569.
